# Supplementary material for: Evidence of human occupation in Mexico around the Last Glacial Maximum
Source: Springer Nature journal article supplement (doi:10.1038/s41586-020-2509-0), 2020-07-22

**Supplementary file 2. This file contains plots used in the assessment of ancient DNA authentication for the animal taxa found.** The first column contains the read length distribution (in Bp) of the reads aligning to the reference (see supplementary metadata file), the second columns plots the number of mismatches (edit distance) of each read to the same reference. In the third column, the fraction of C-T transitions due to DNA damage, as calculated by mapDamage2.0, is plotted. Each new row contains a new species from a specific layer.

### UE1201 Corvus

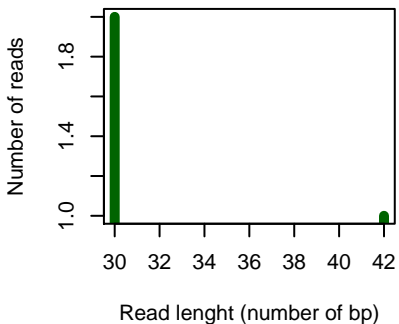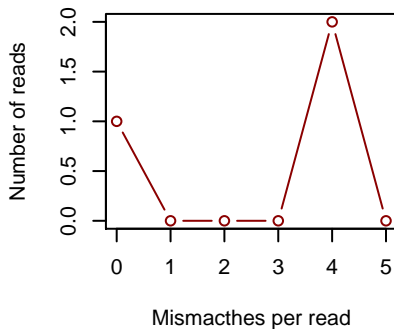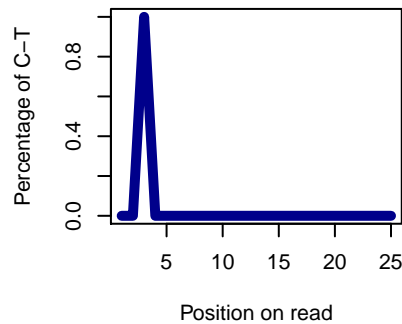

### UE1201 Desmodus

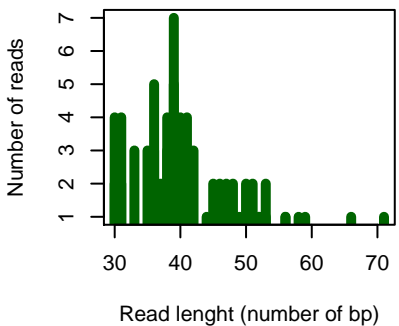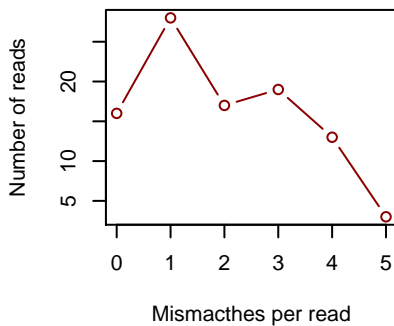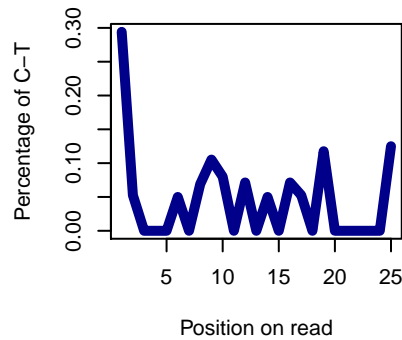

### UE1201 Dipodomys

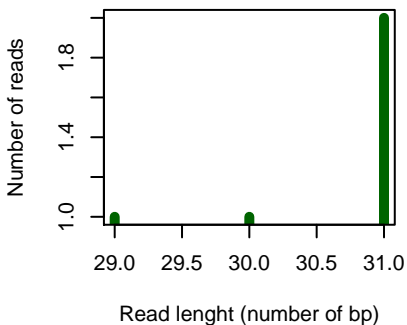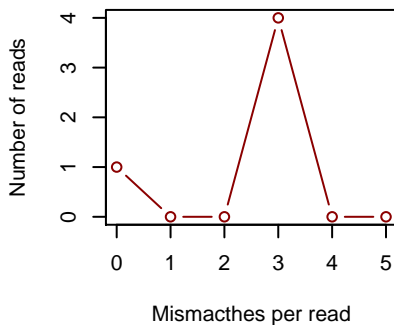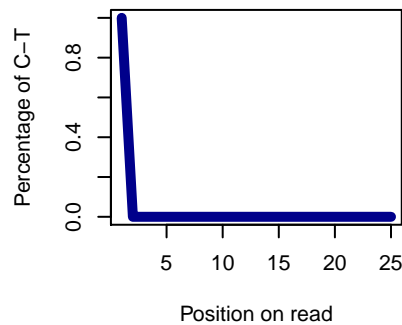

### UE1201 Eptesicus

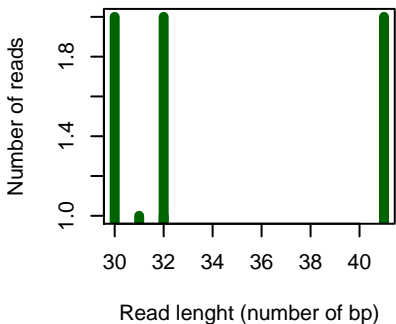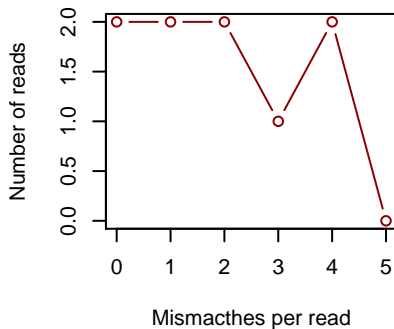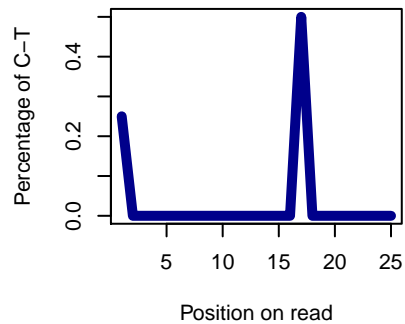

### UE1201 Equus[1]

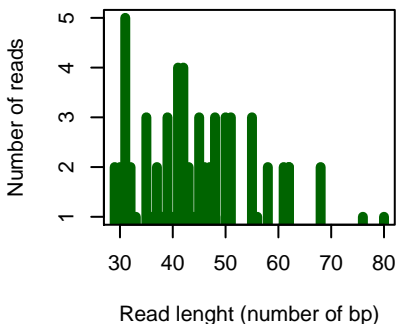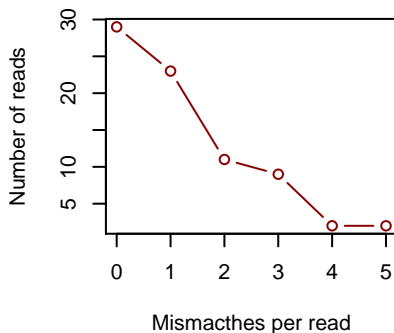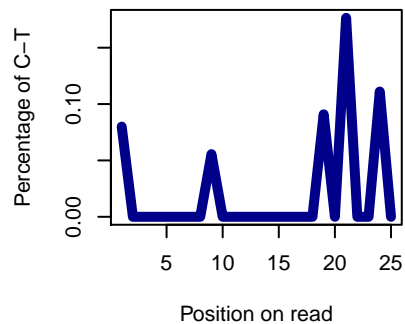

### UE1201 Equus[2]

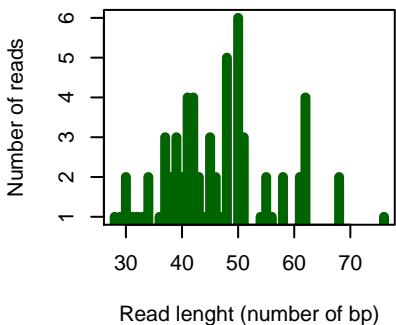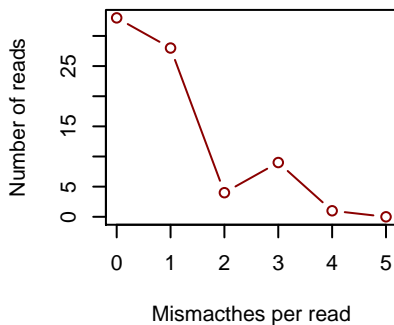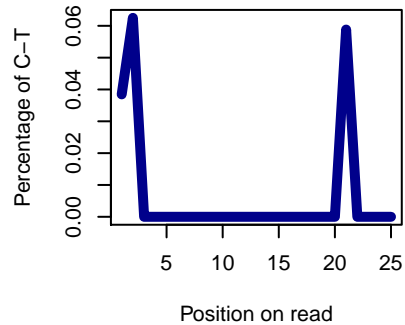

### UE1201 Myotis

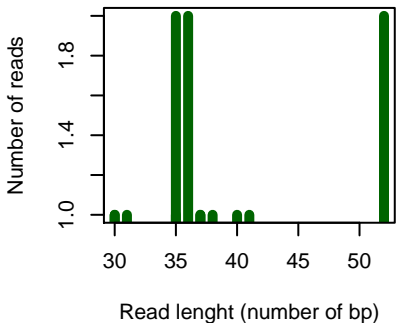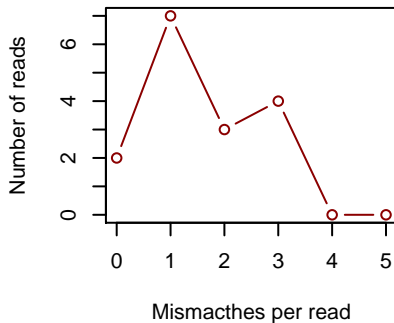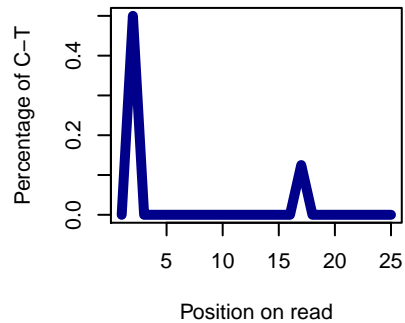

### UE1201 Ovis

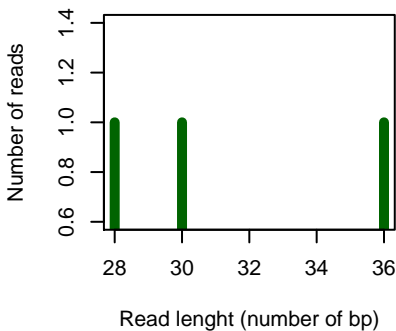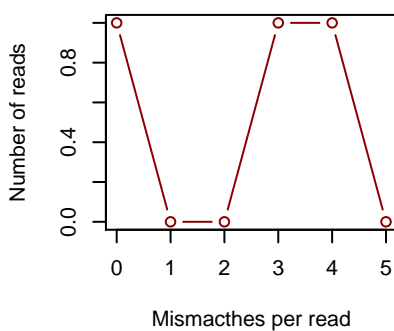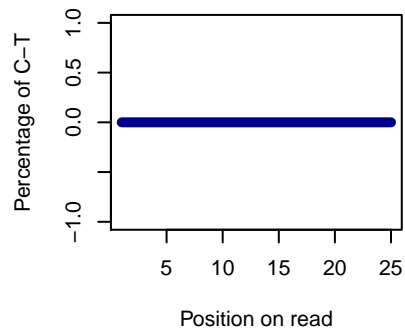

### UE1201 Ursus

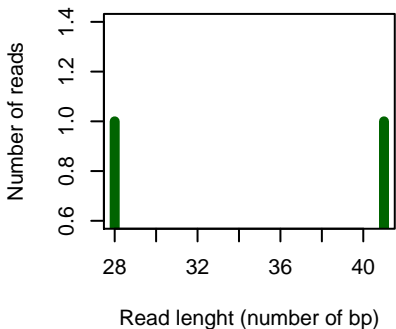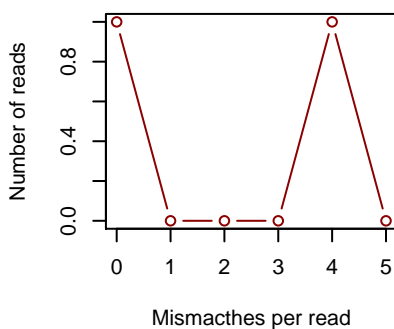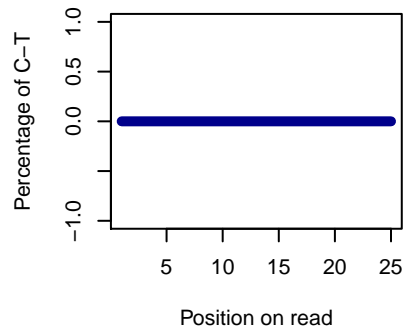

### UE1204C Desmodus

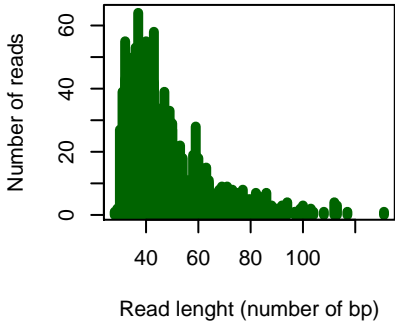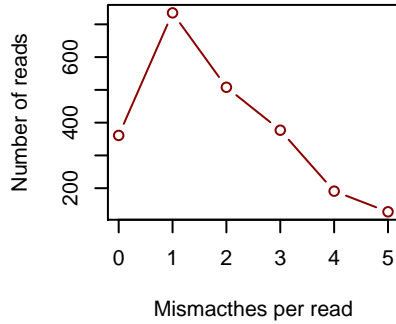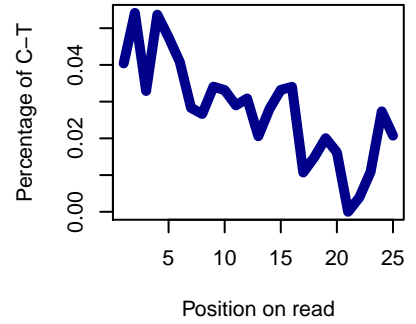

### UE1204C Eptesicus

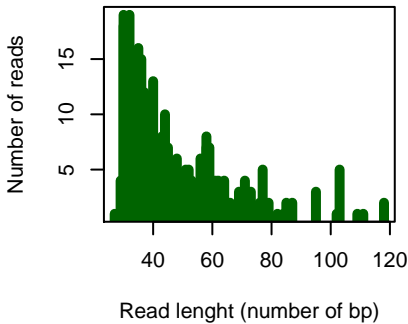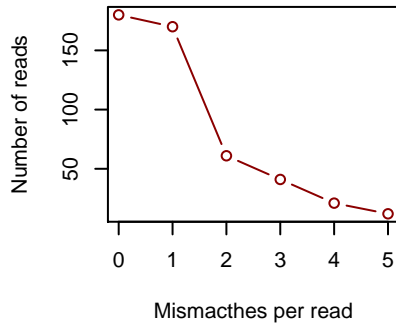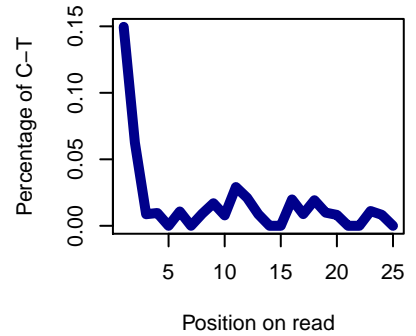

### UE1204C Equus[1]

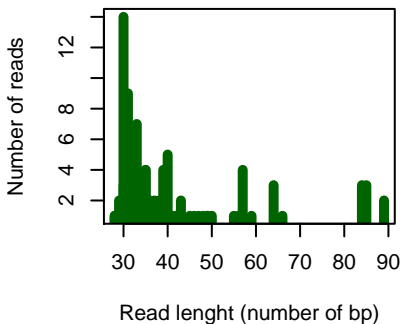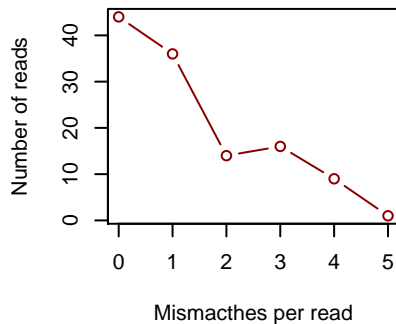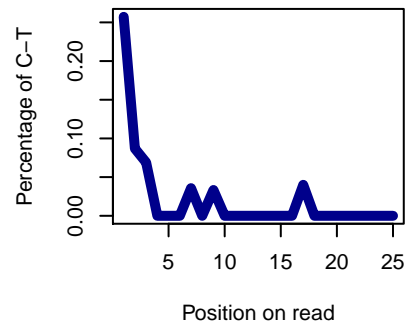

### UE1204C Equus[2]

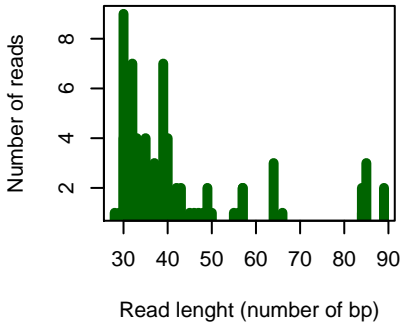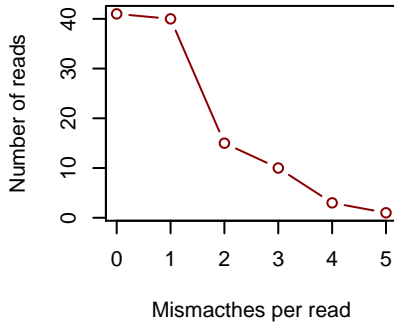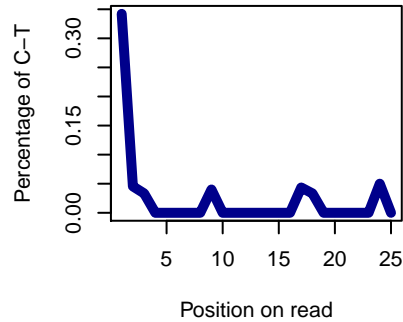

### UE1204C Ictidomys

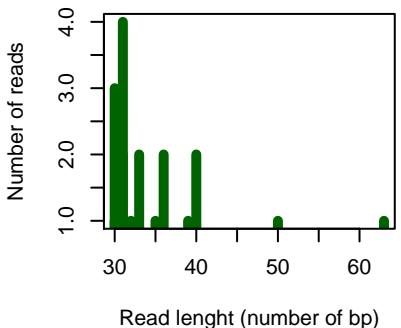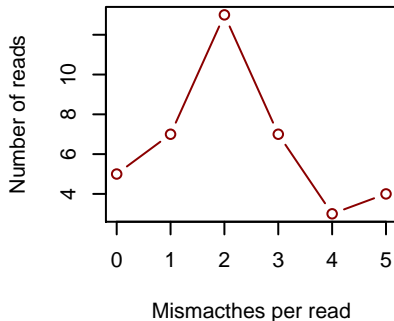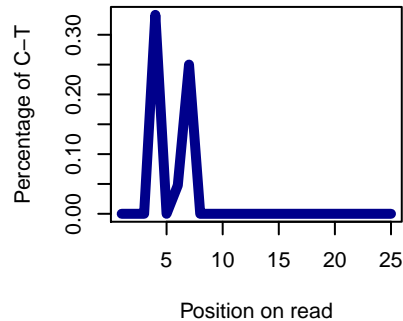

### UE1204C Marmota

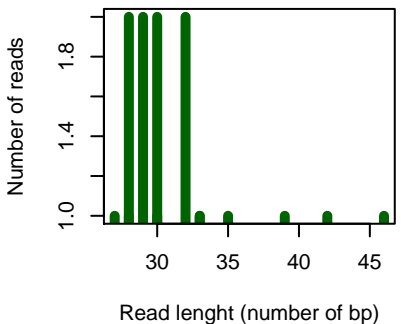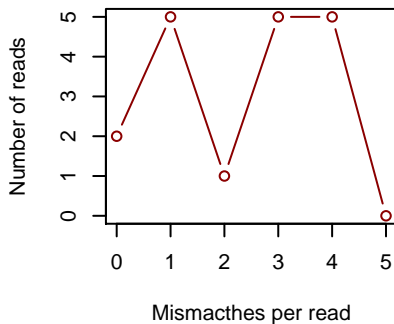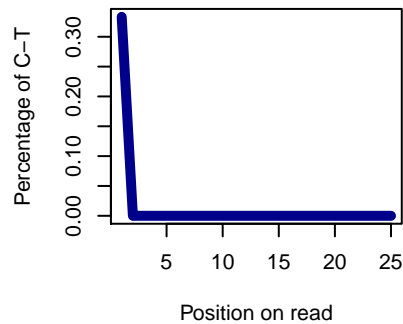

### UE1204C *Microtus*

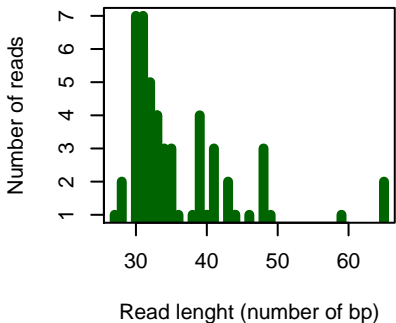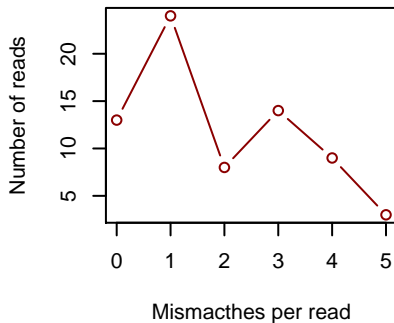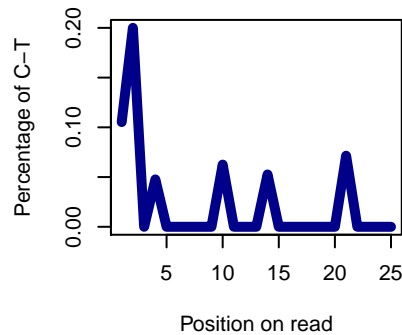

### UE1204C *Myotis*

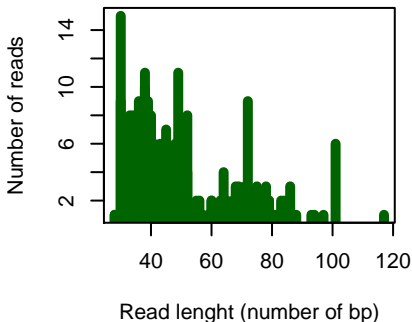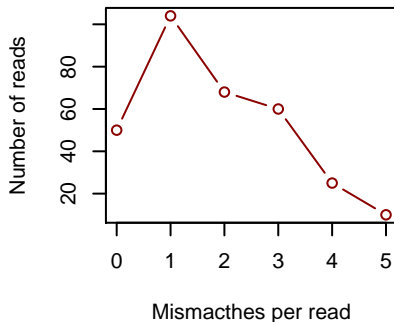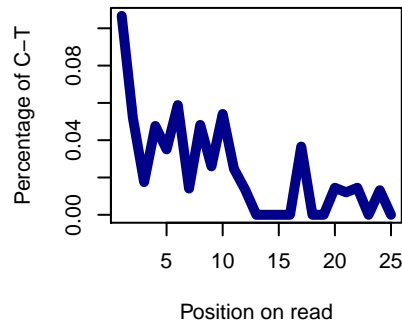

### UE1204C *Peromyscus*

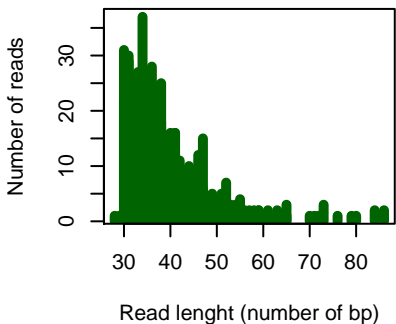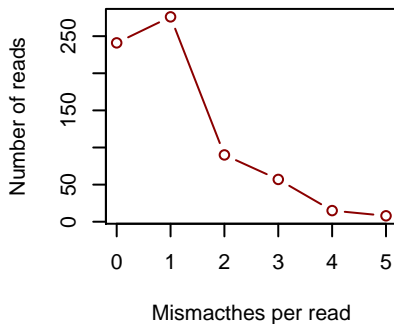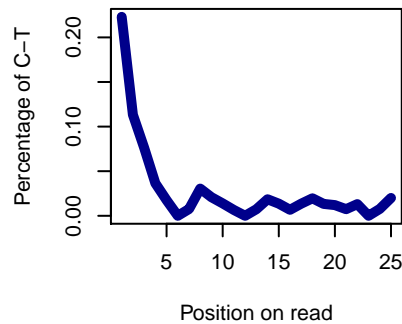

### UE1204C Ursus

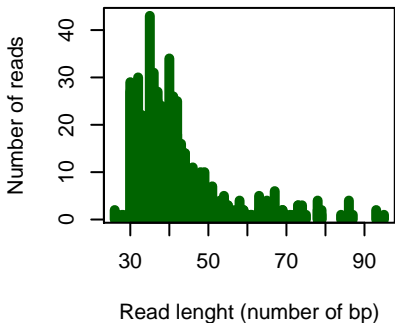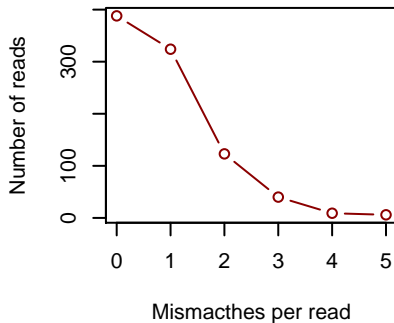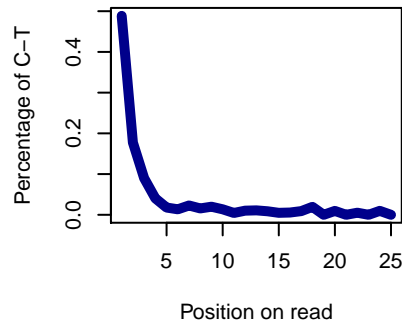

### UE1206 Eptesicus

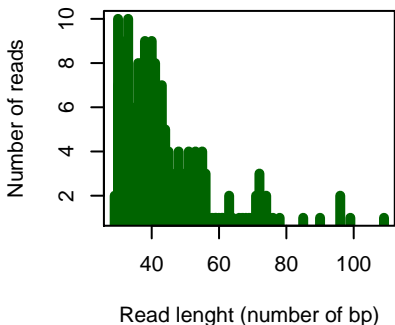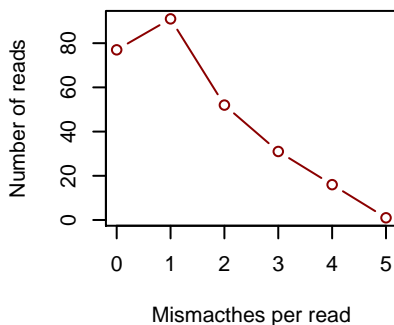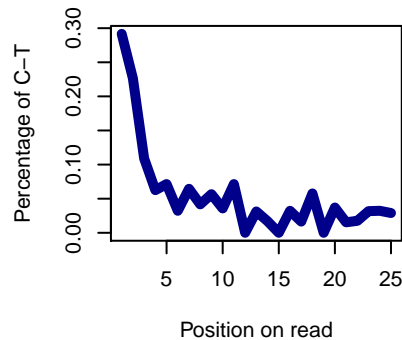

### UE1206 Myotis

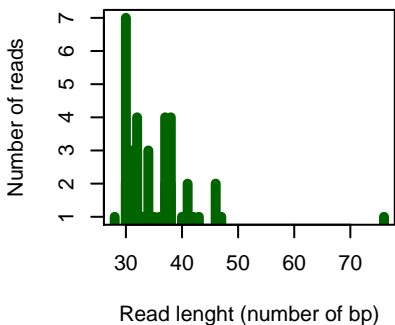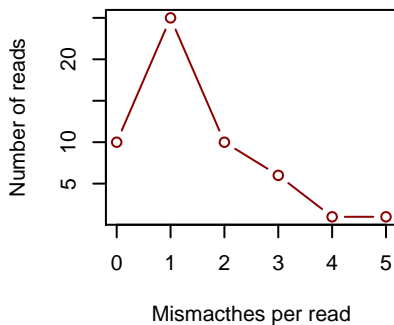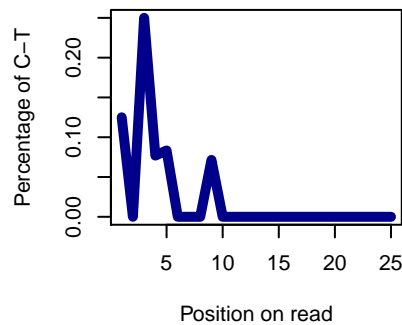



### UE1206 Peromyscus

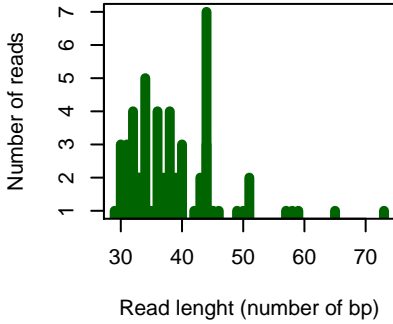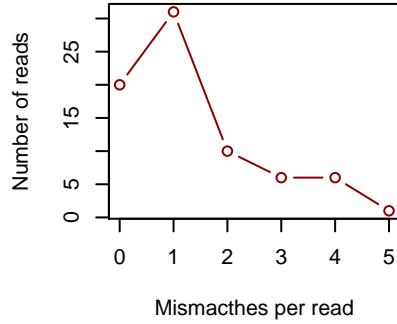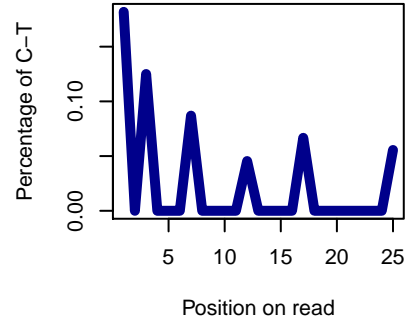

### UE1206 Ursus

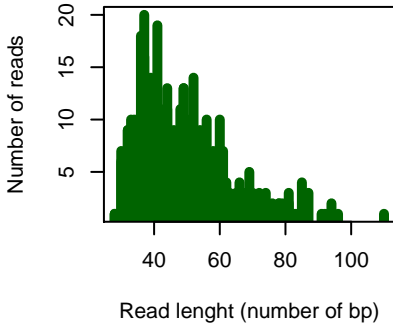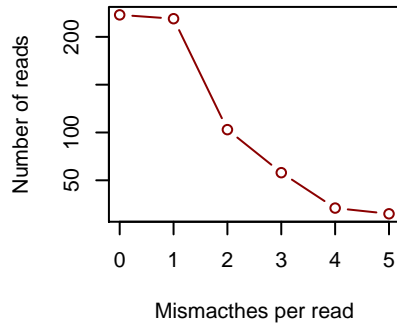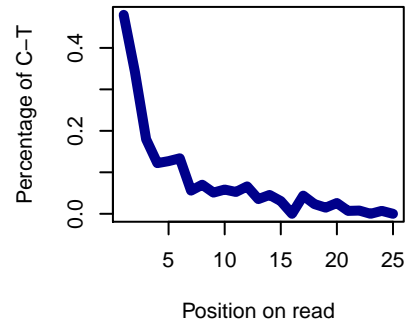

### UE1207A Eptesicus

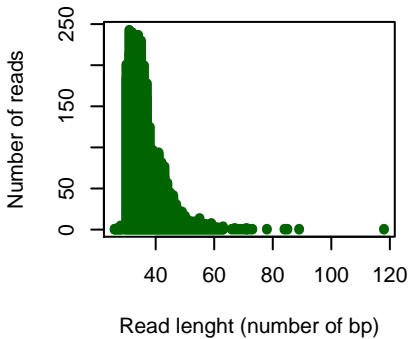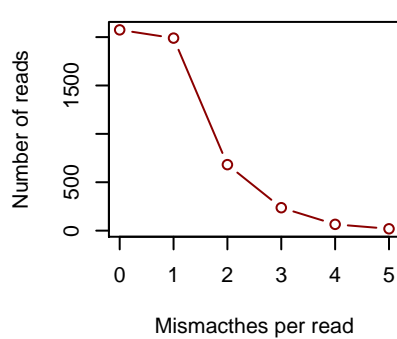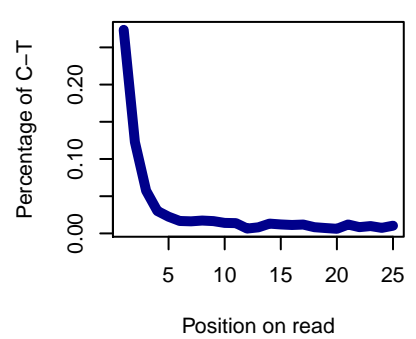

### UE1207A *Microtus*

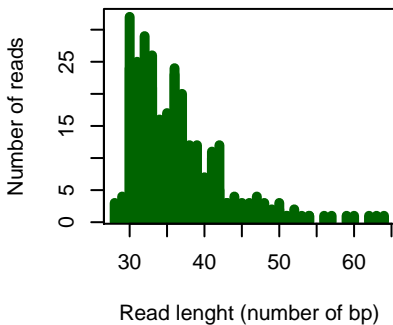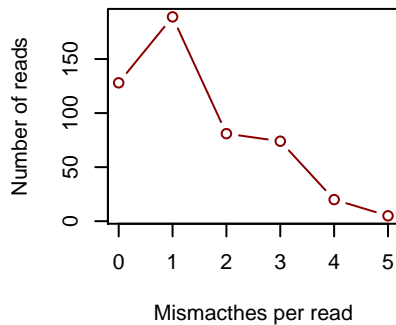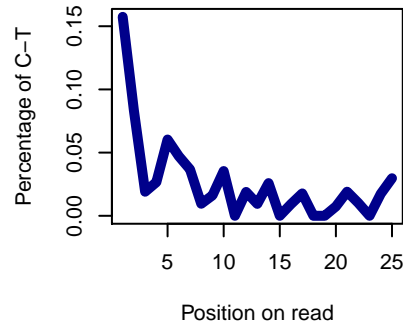

### UE1207A *Myotis*

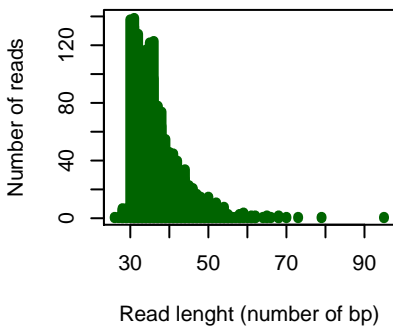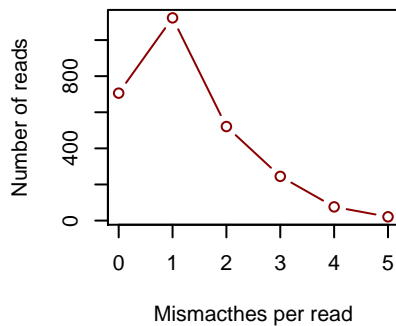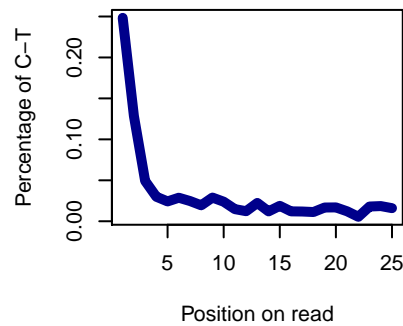

### UE1207A *Peromyscus*

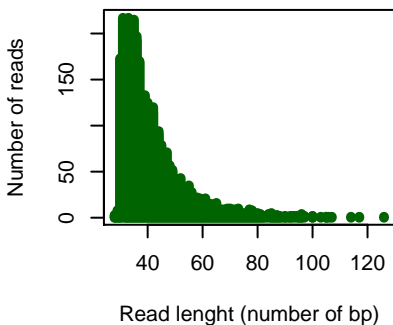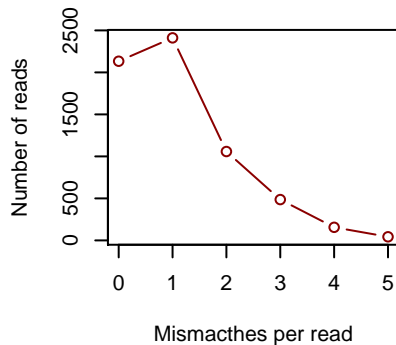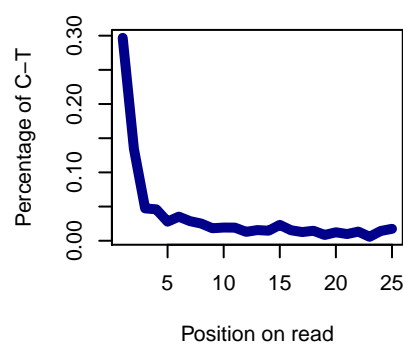

### UE1207A Ursus

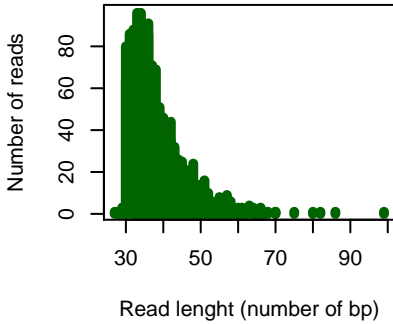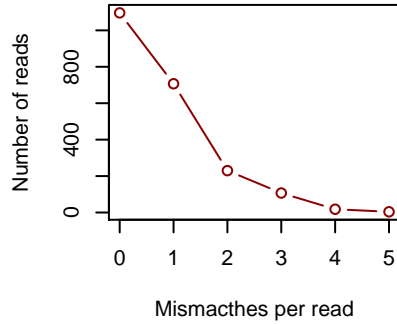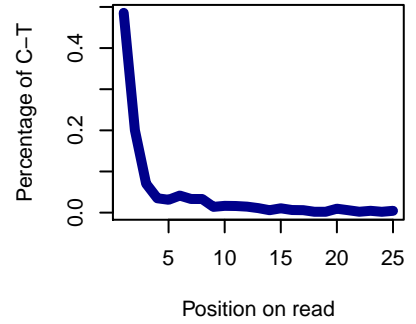

### UE1207C Eptesicus

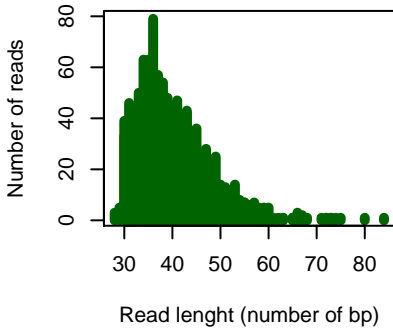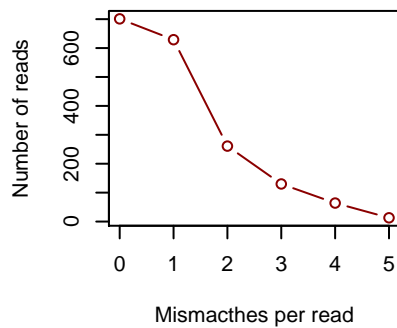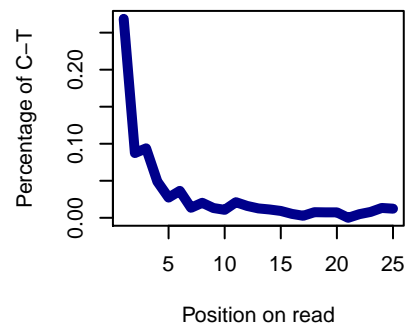

### UE1207C Equus[1]

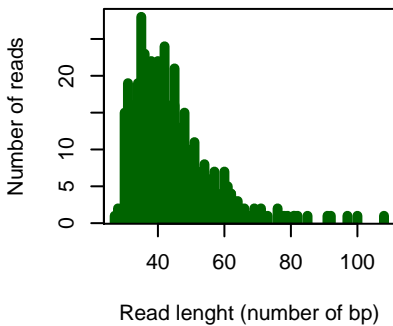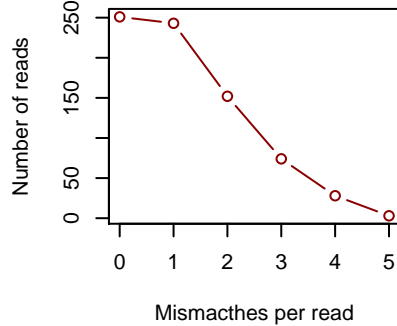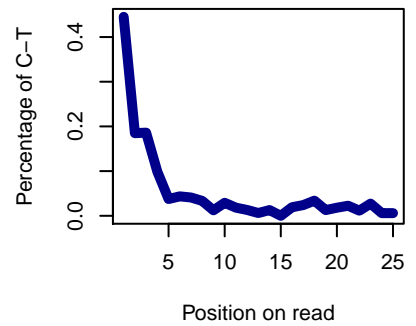

### UE1207C Equus[2]

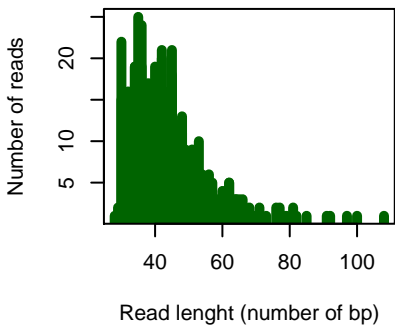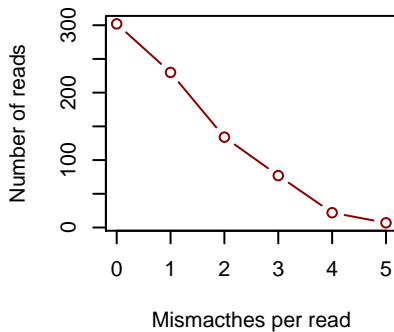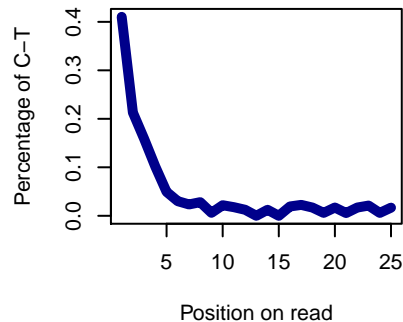

### UE1207C Ictidomys

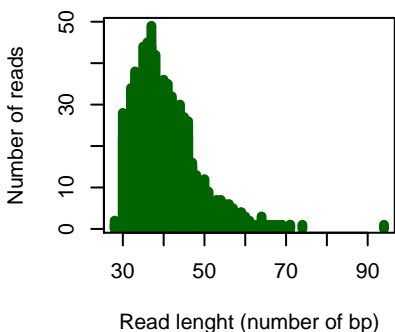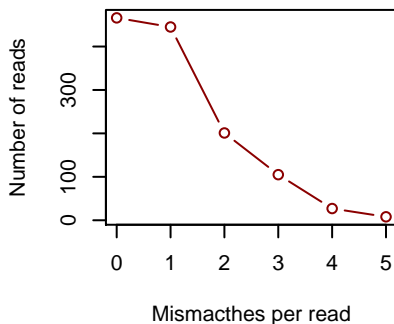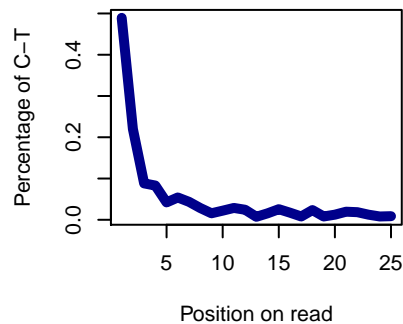

### UE1207C Marmota

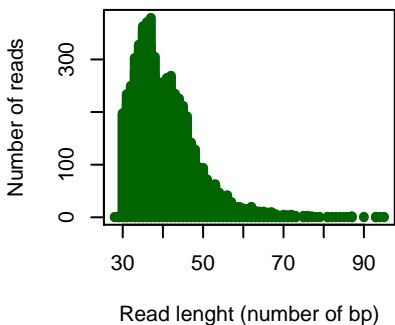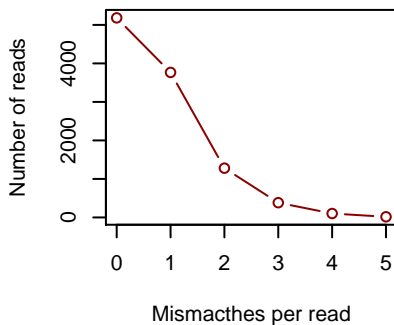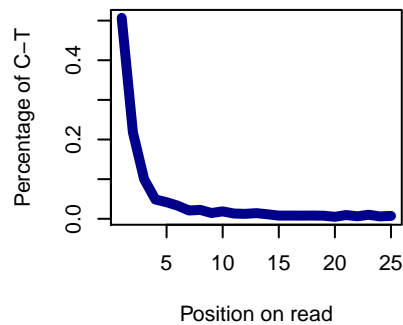

### UE1207C *Microtus*

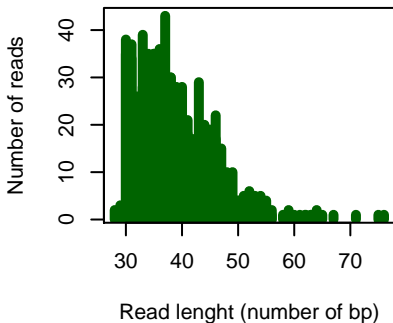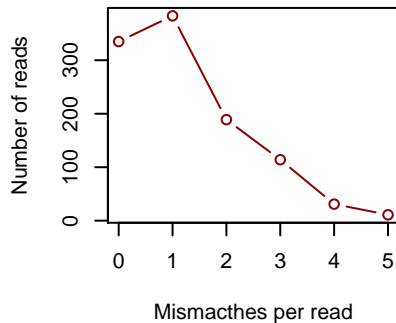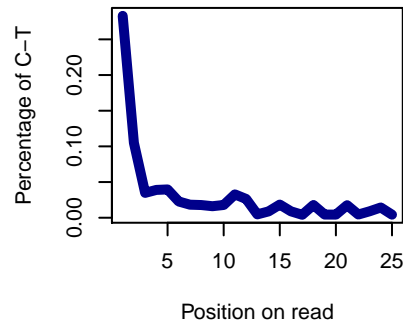

### UE1207C *Myotis*

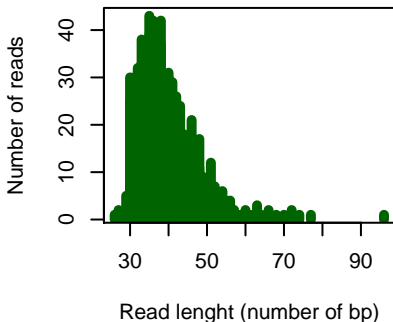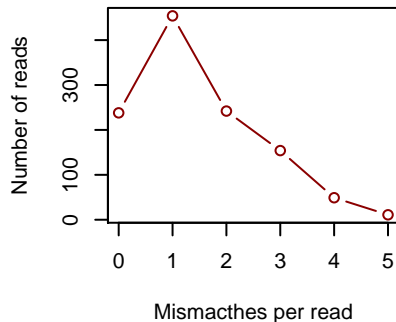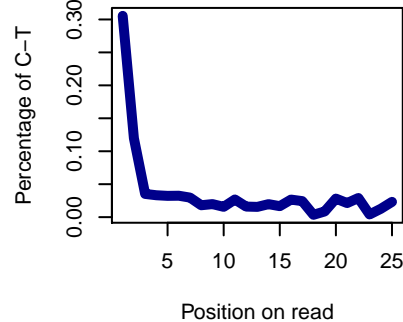

### UE1207C *Peromyscus*

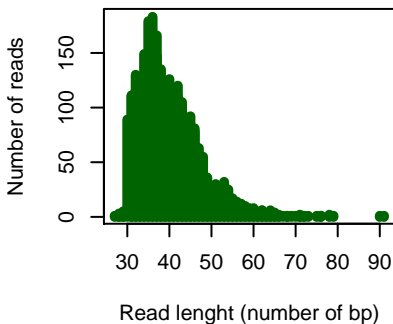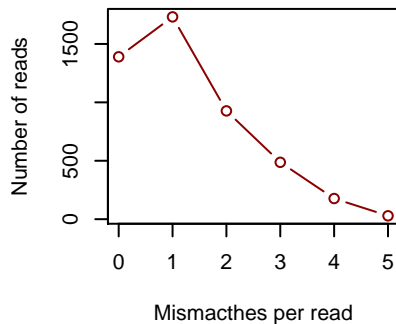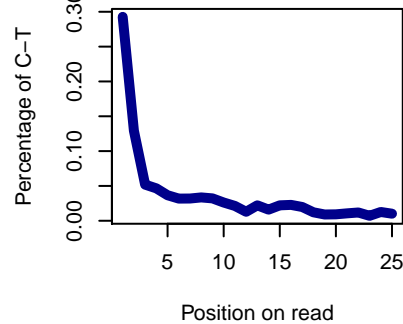

### UE1207C Urocitellus

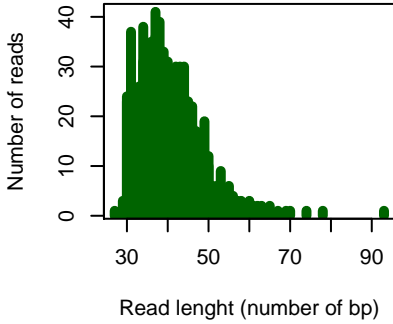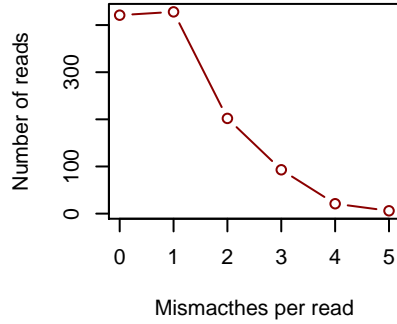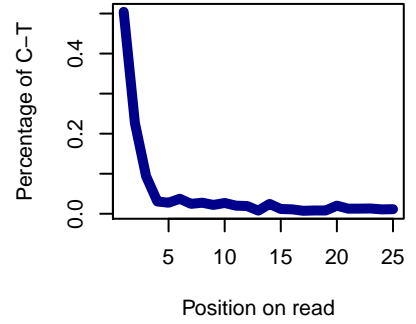

### UE1207C Ursus

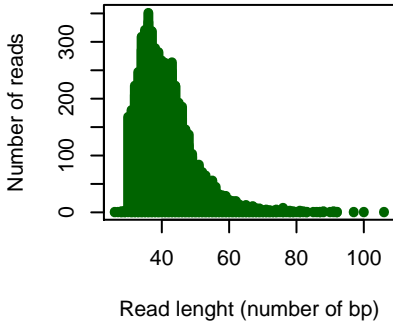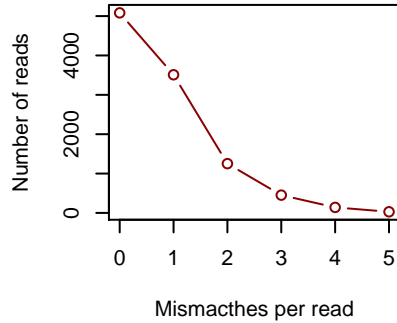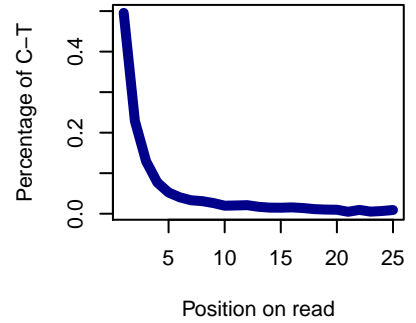

### UE1208 Eptesicus

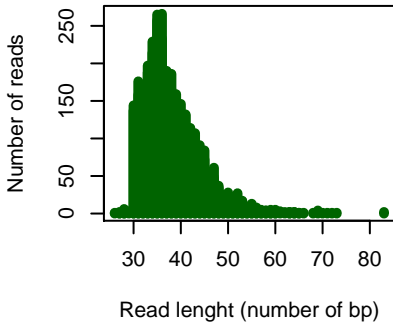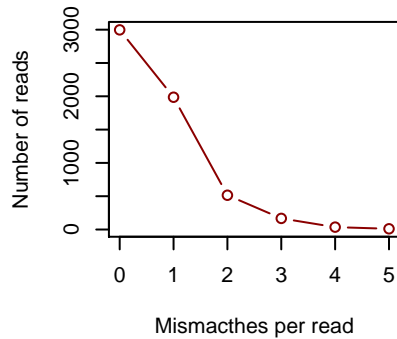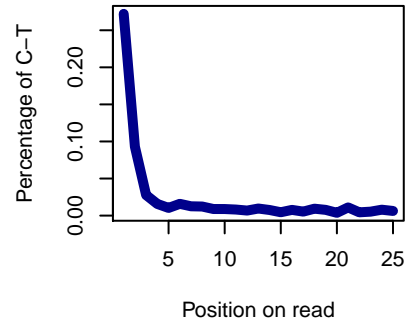

### UE1208 Equus[1]

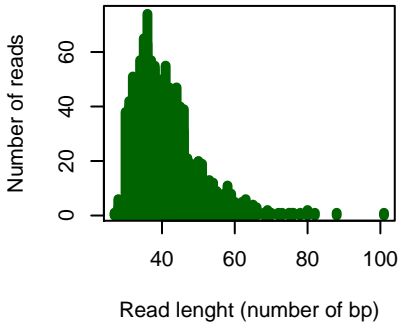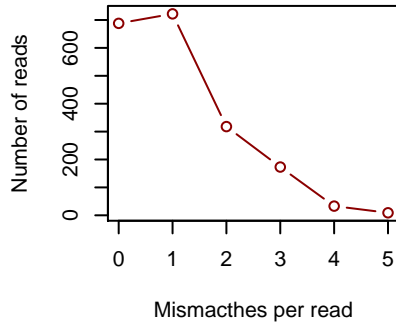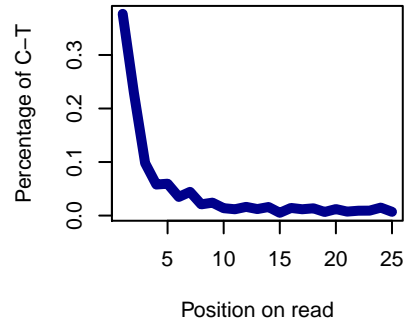

### UE1208 Equus[2]

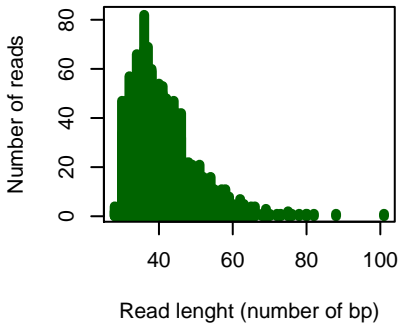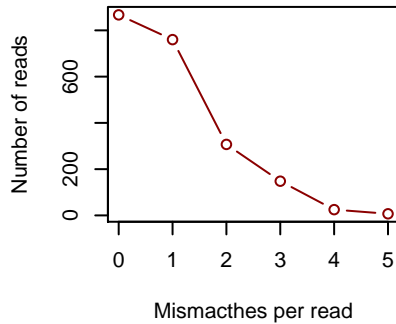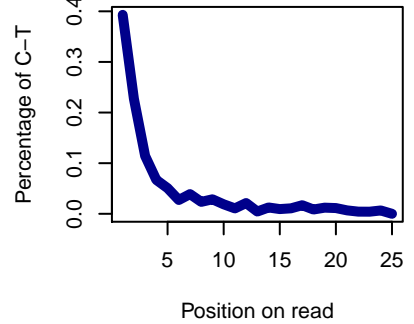

### UE1208 Ictidomys

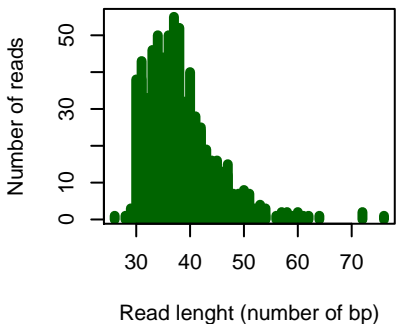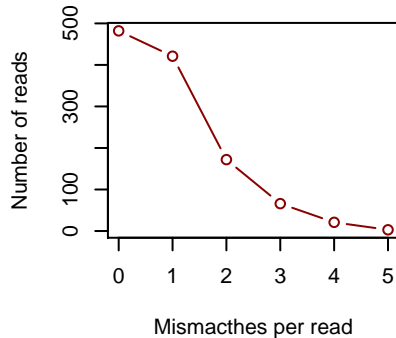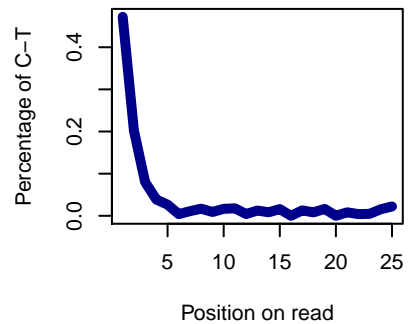

### UE1208 Marmota

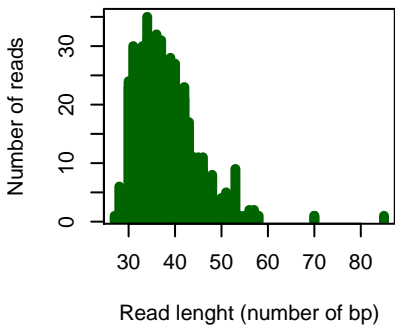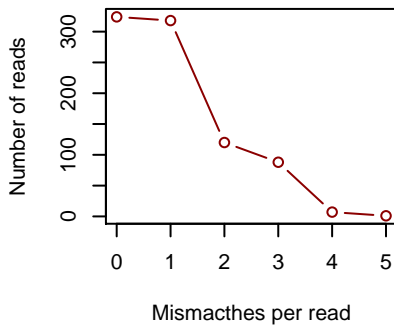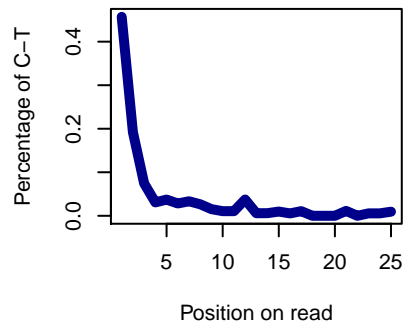

### UE1208 Microtus

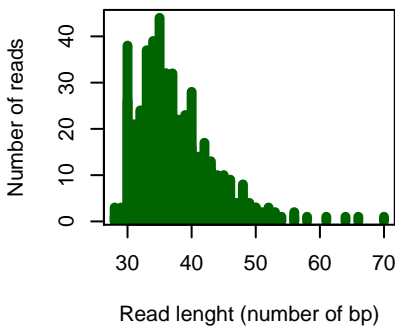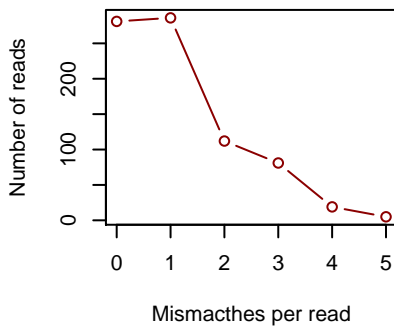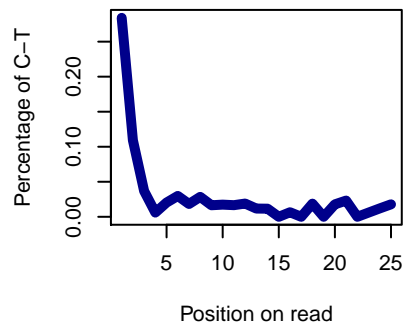

### UE1208 Myotis

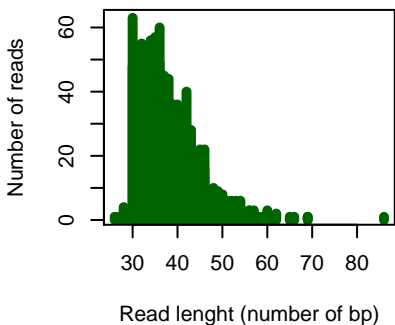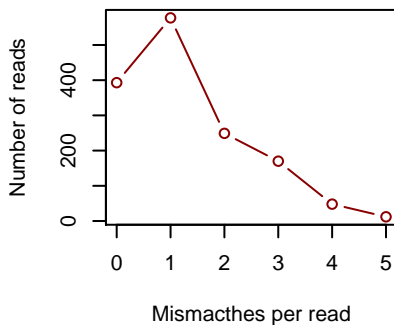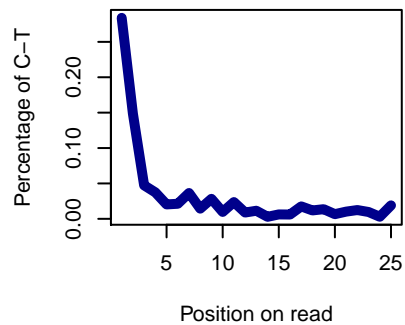



### UE1208 Peromyscus

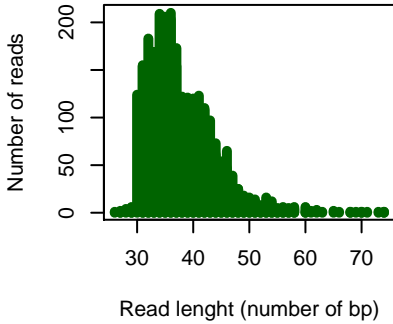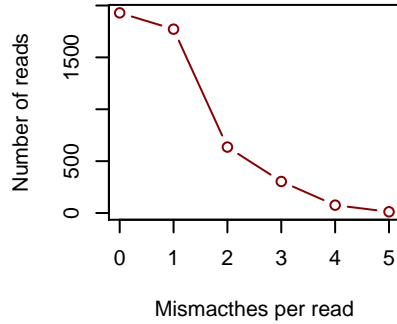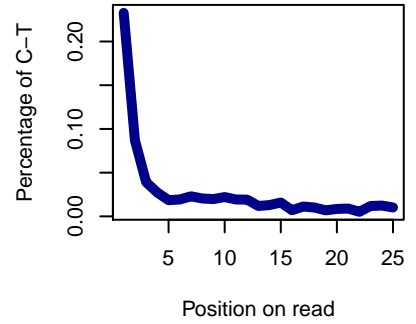

### UE1208 Urocitellus

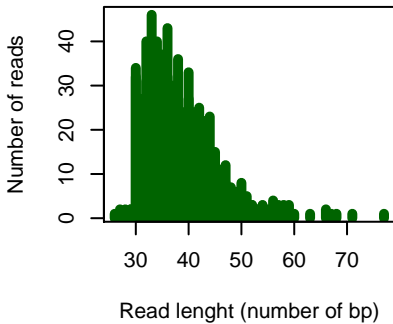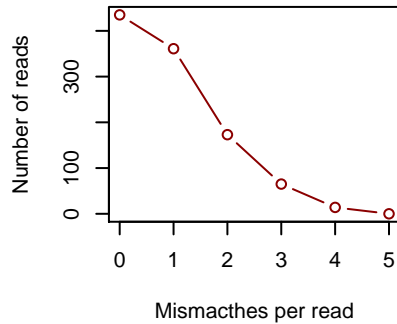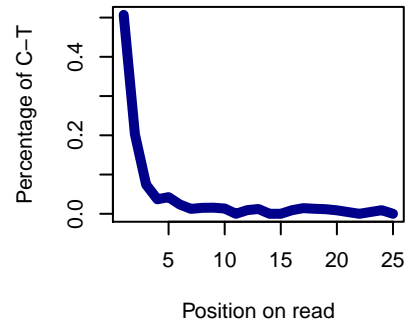

### UE1208 Ursus

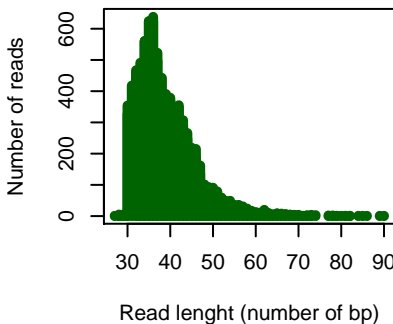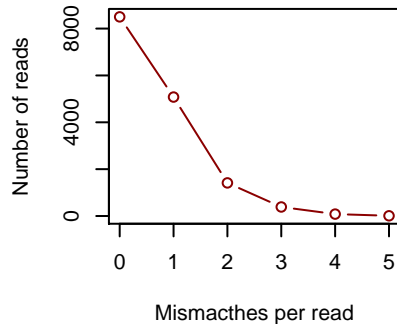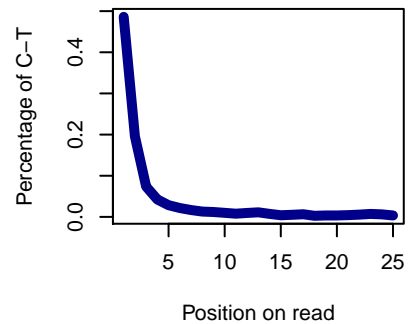

### UE1210 Eptesicus

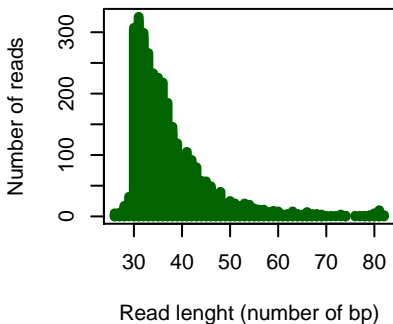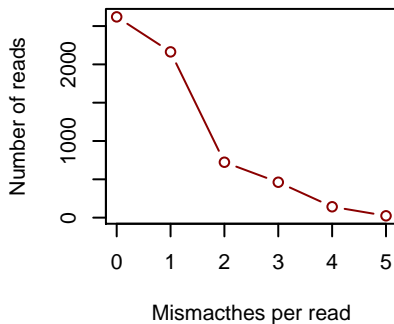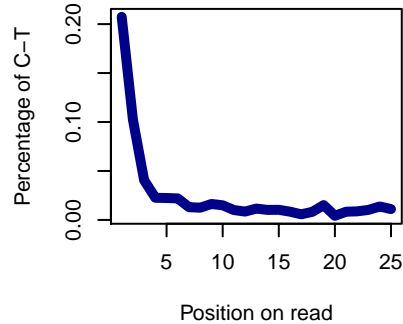

### UE1210 Marmota

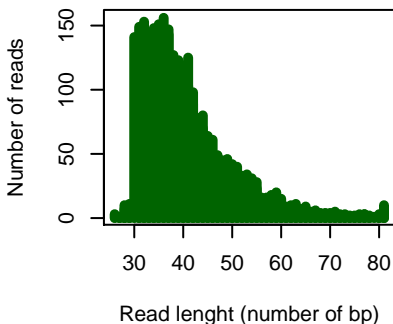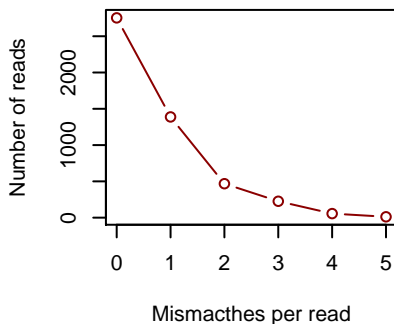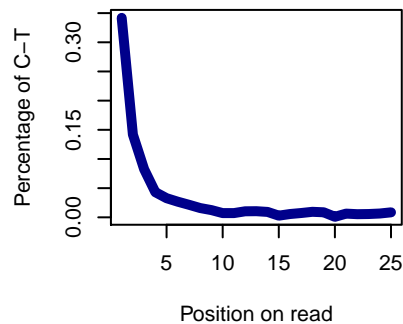

### UE1210 Microtus

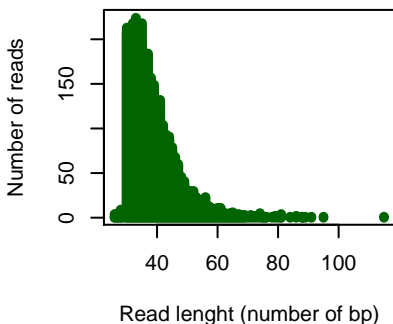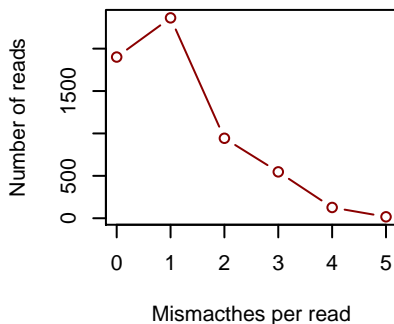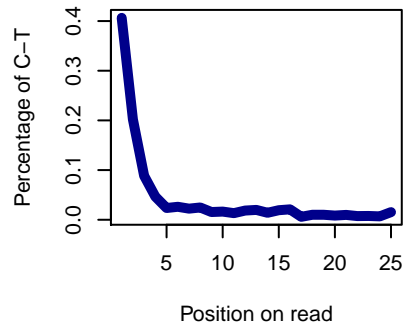

### UE1210 Myotis

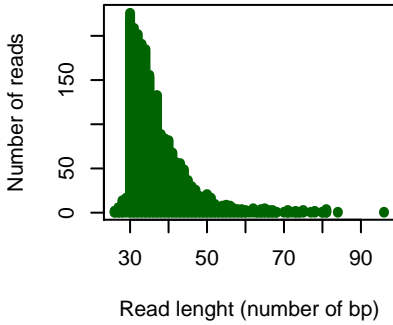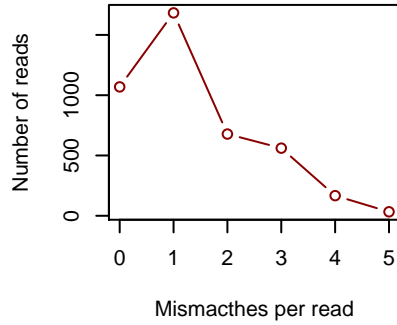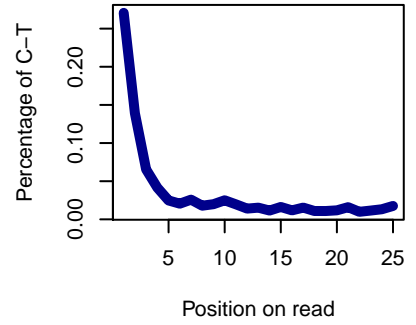

### UE1210 Peromyscus

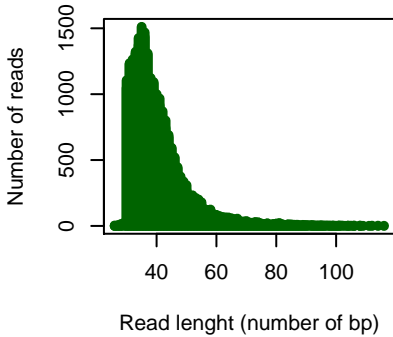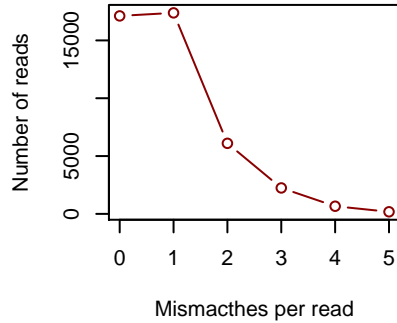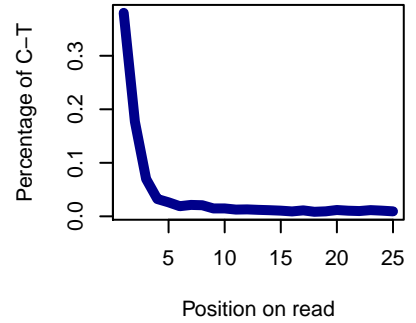

### UE1210 Ursus

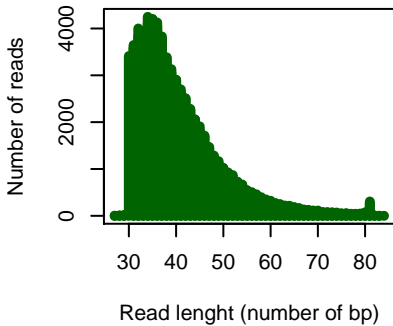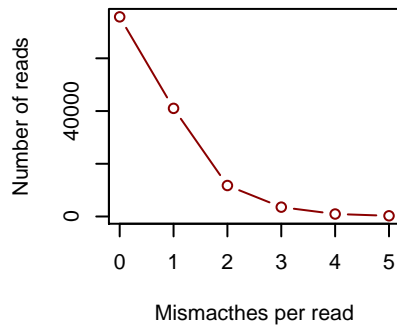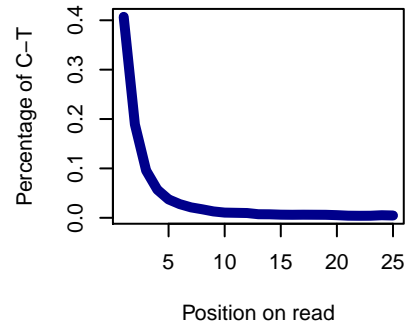

### UE1212 Eptesicus

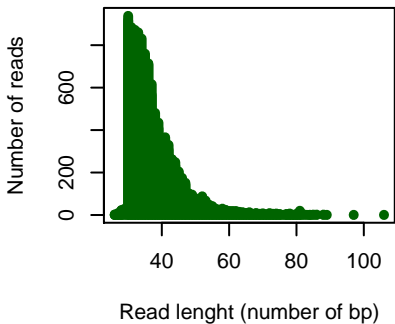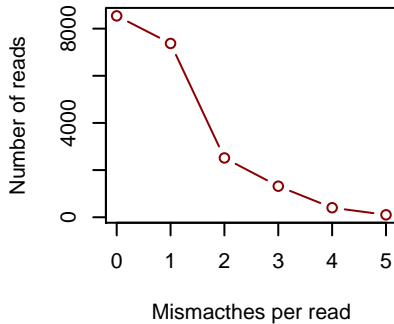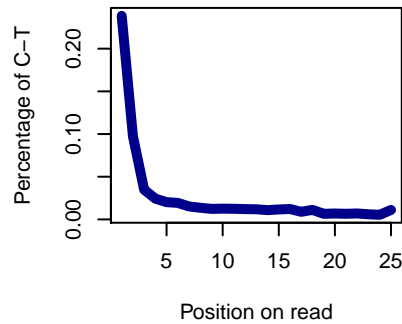

### UE1212 Marmota

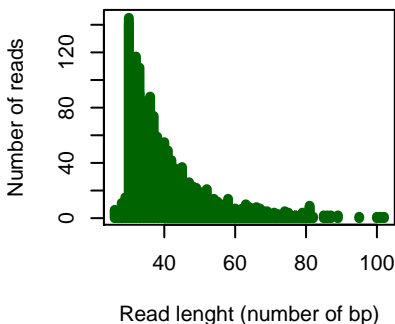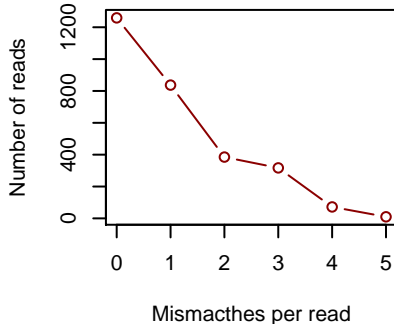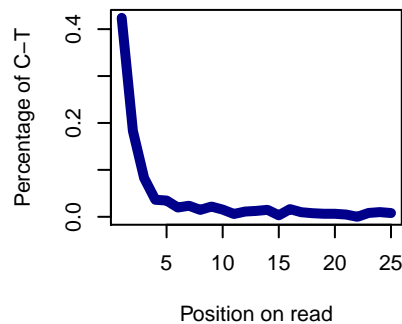

### UE1212 Microtus

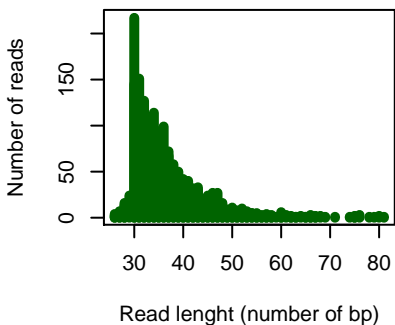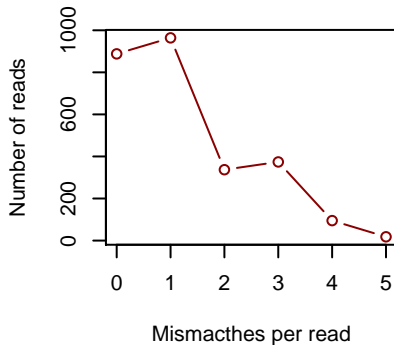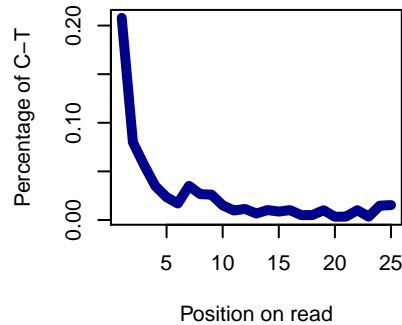

### UE1212 Myotis

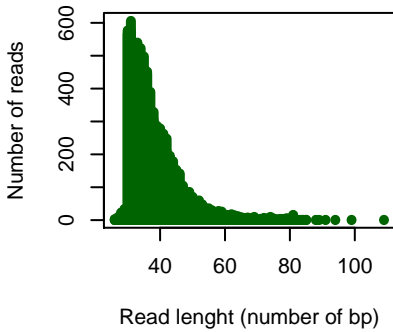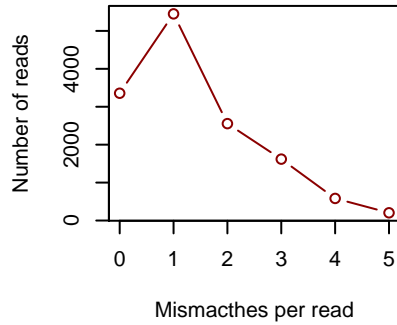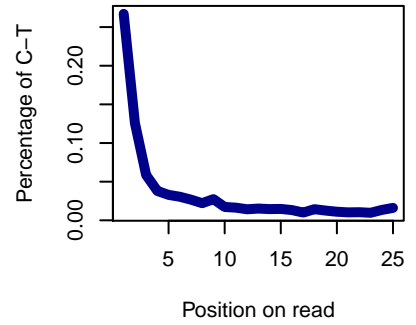

### UE1212 Peromyscus

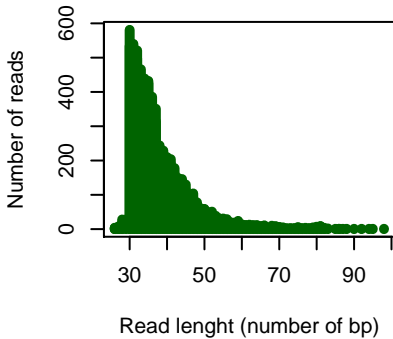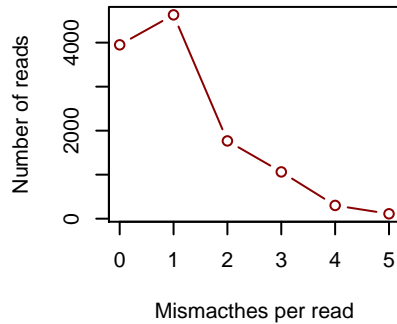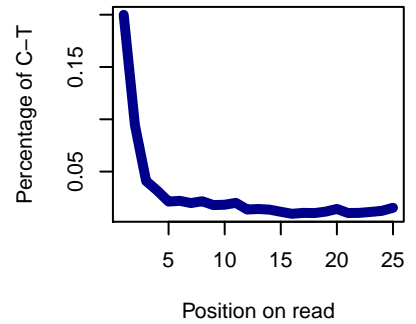

### UE1212 Ursus

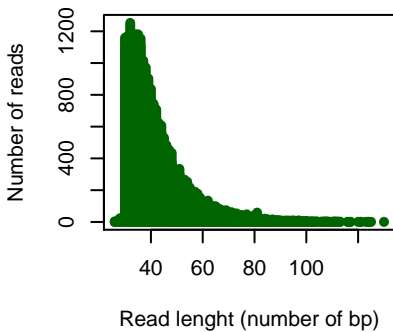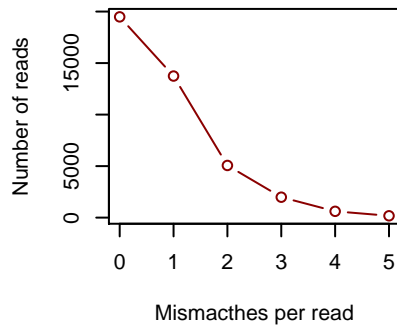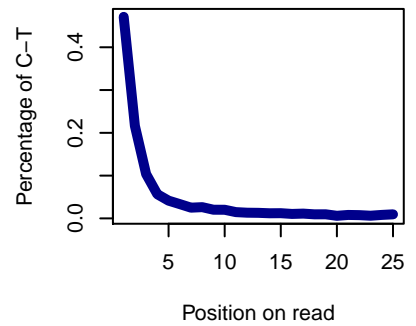

### UE1215 Eptesicus

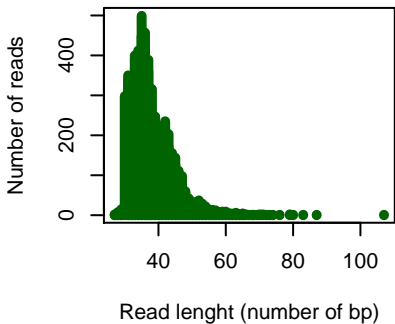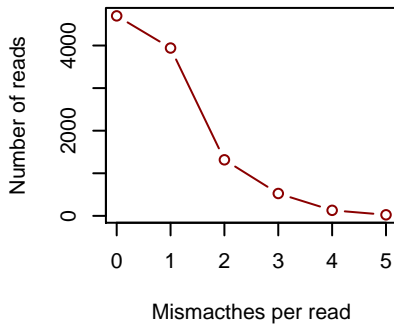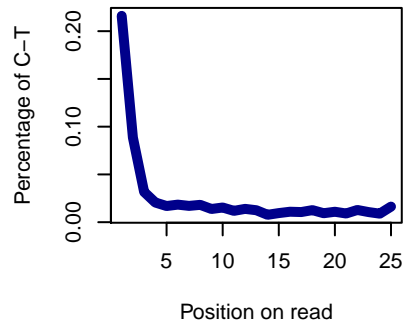

### UE1215 Equus[1]

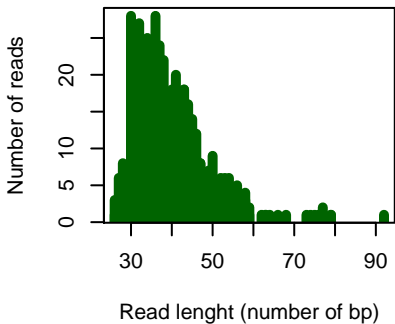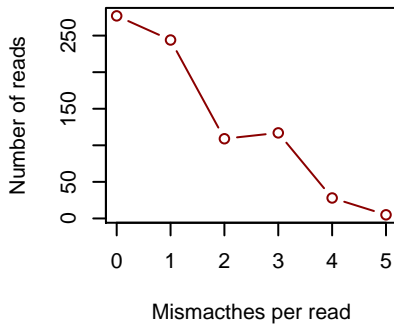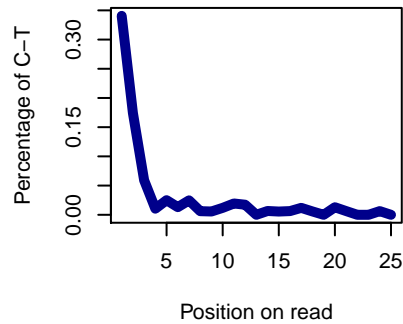

### UE1215 Equus[2]

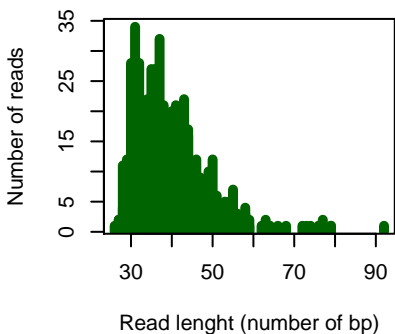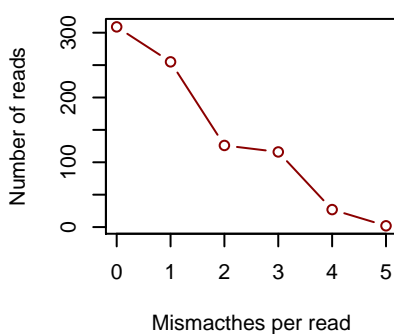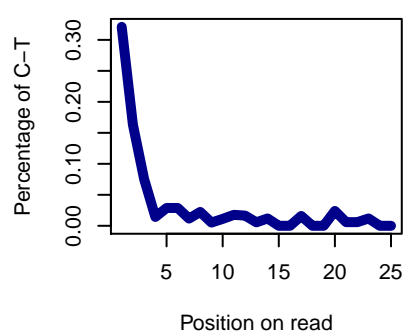

### UE1215 Marmota

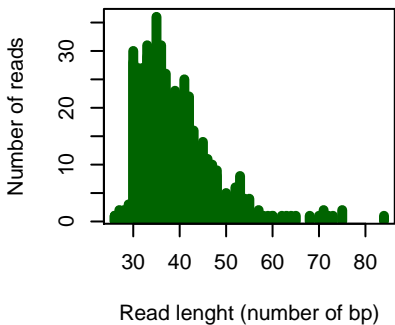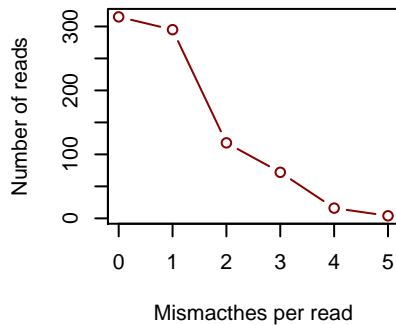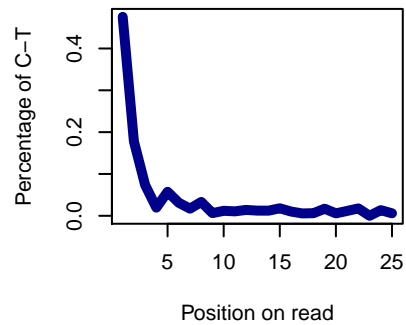

### UE1215 Microtus

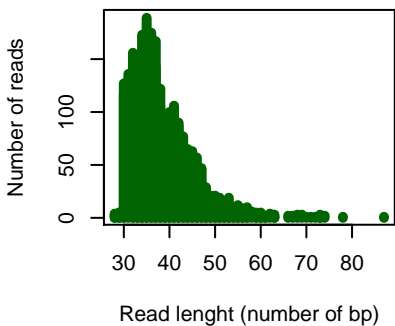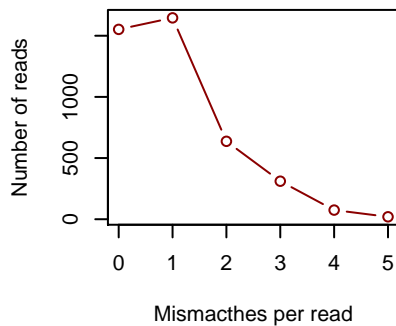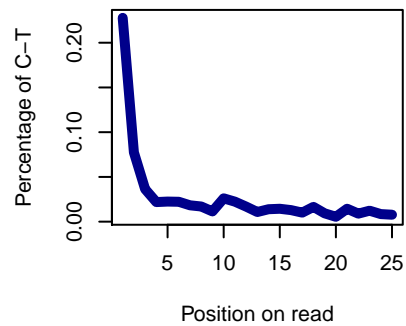

### UE1215 Myotis

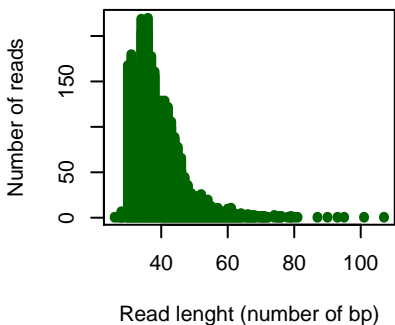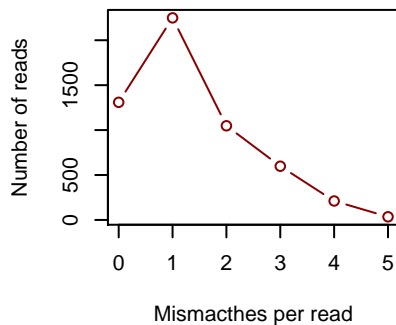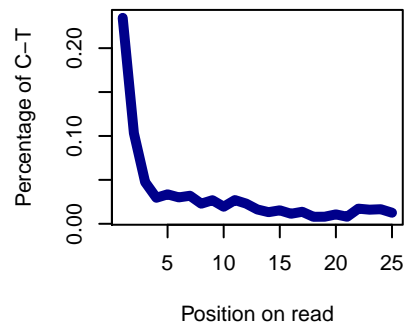

### UE1215 Peromyscus

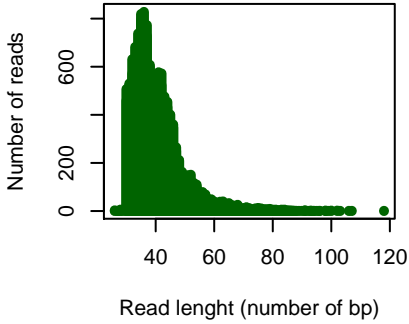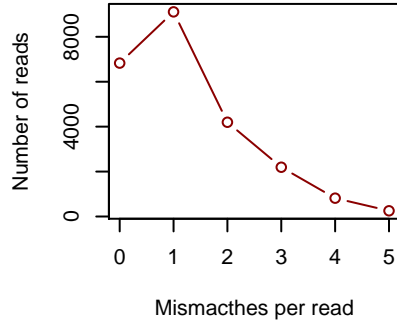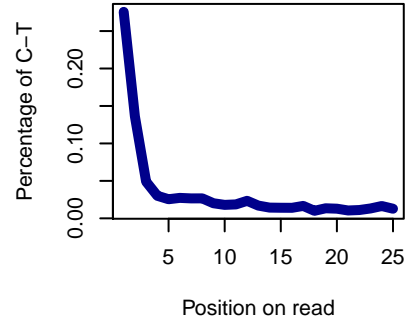

### UE1215 Ursus

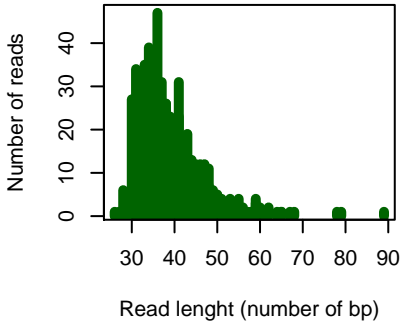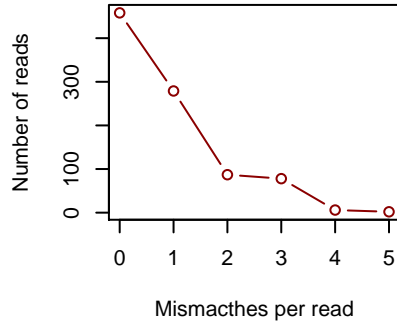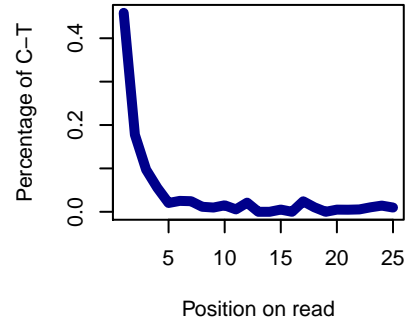

### UE1217 Eptesicus

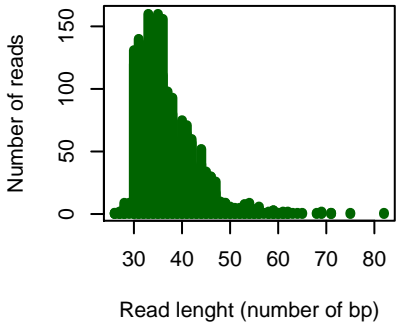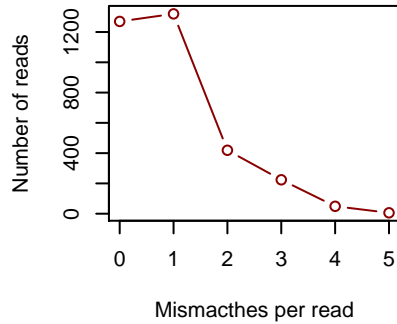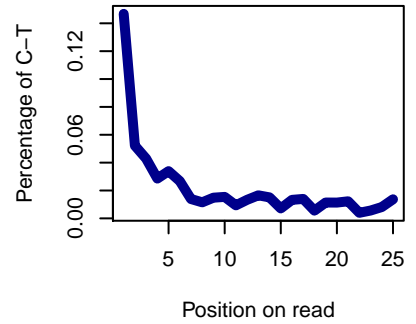



### UE1217 Equus[1]

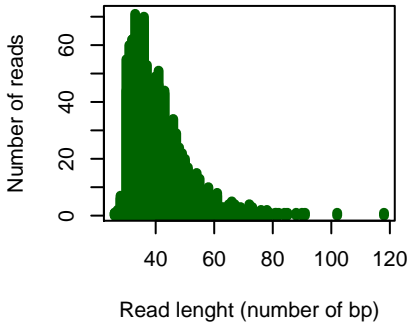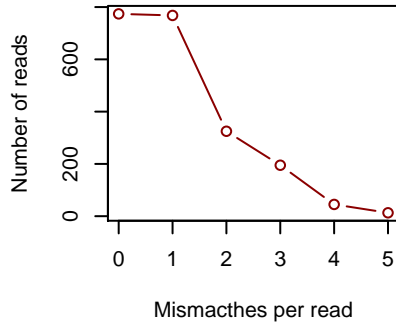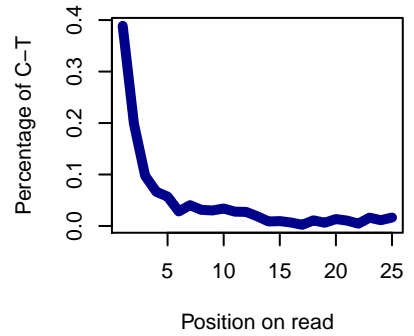

### UE1217 Equus[2]

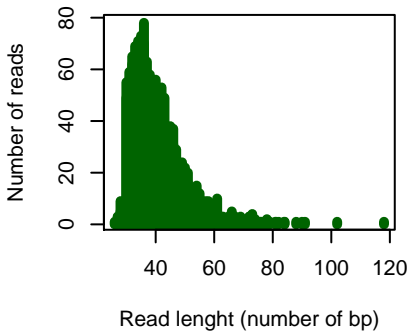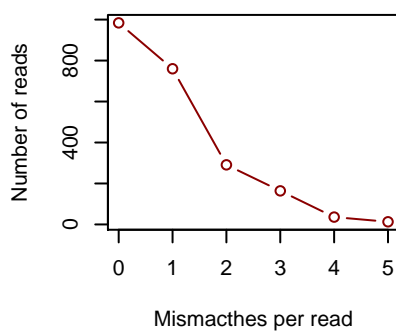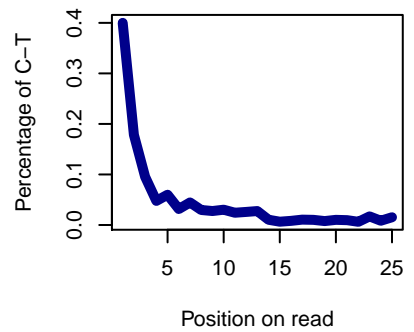

### UE1217 Falco

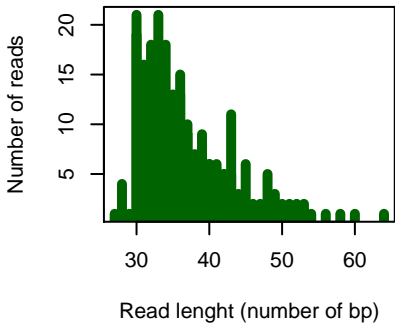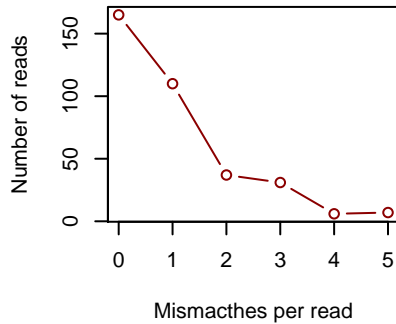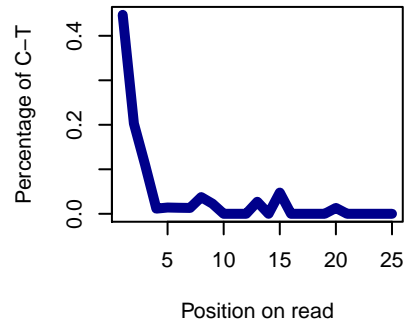

### UE1217 Ictidomys

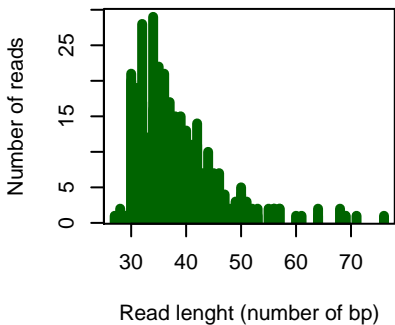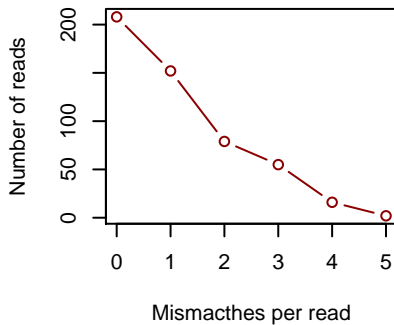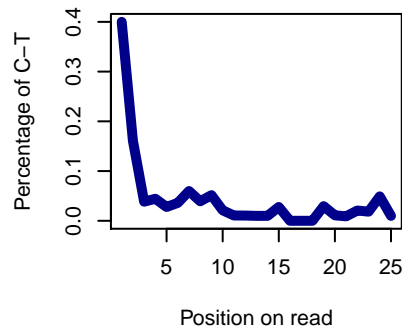

### UE1217 Microtus

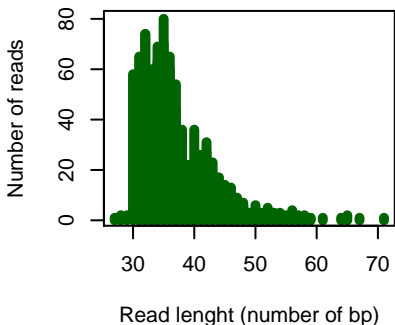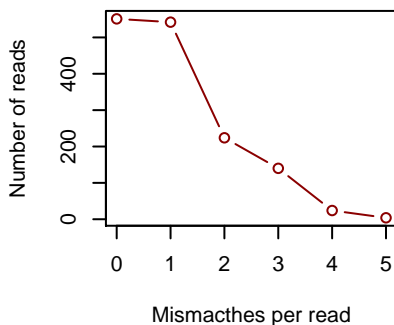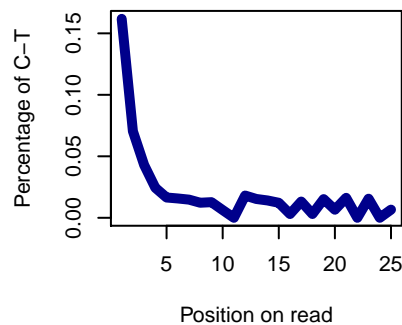

### UE1217 Myotis

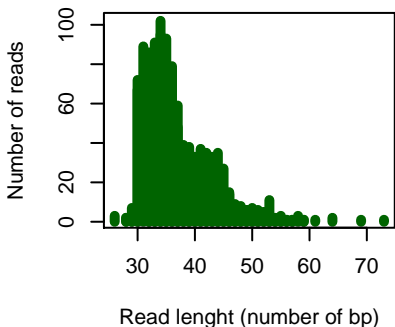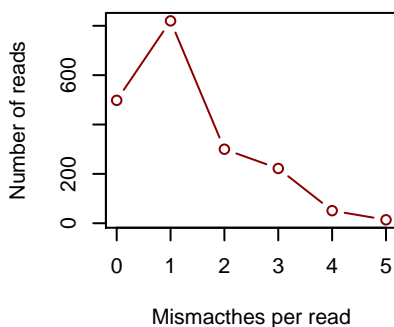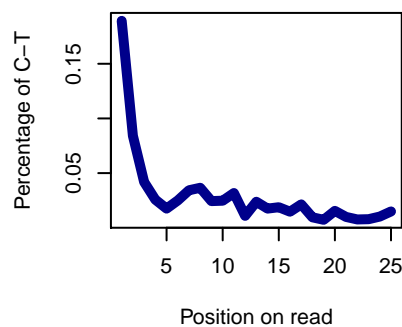

### UE1217 Peromyscus

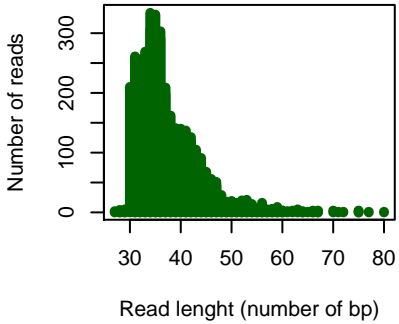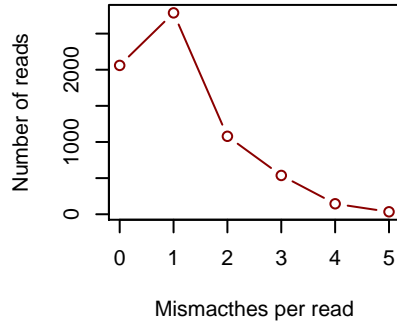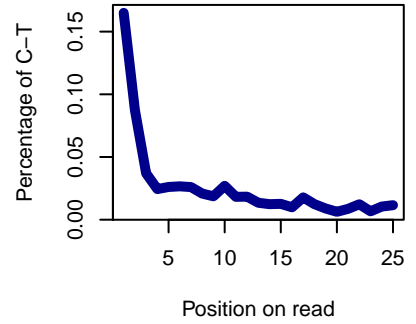

### UE1217 Urocitellus

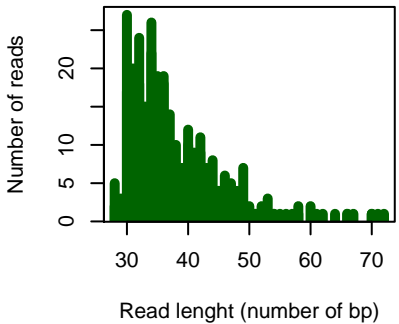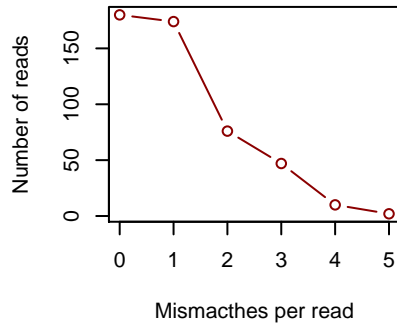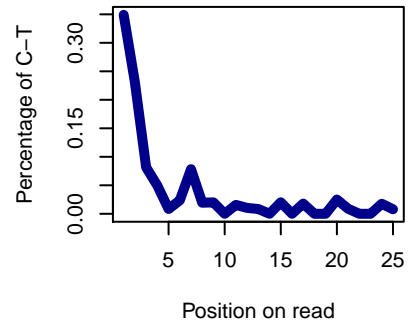

### UE1217 Ursus

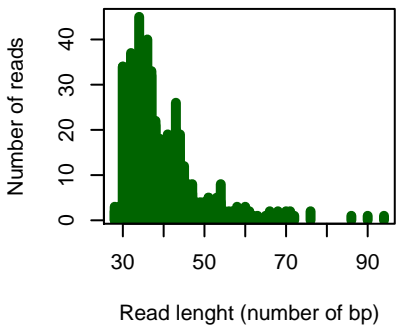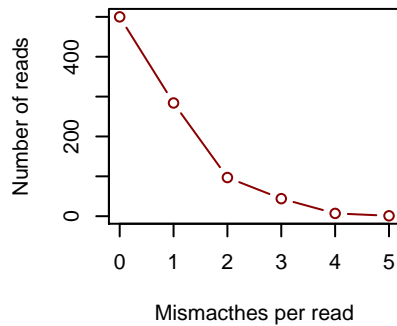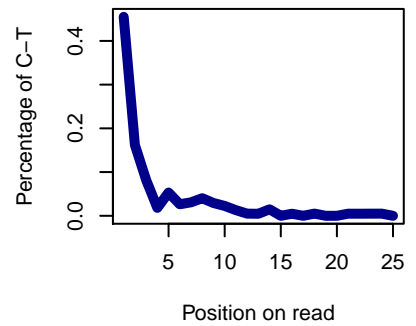

### UE1217 Zonotrichia

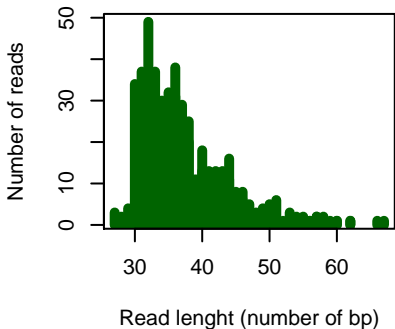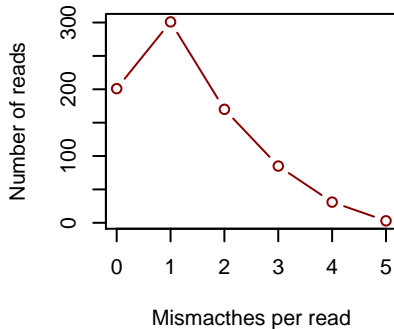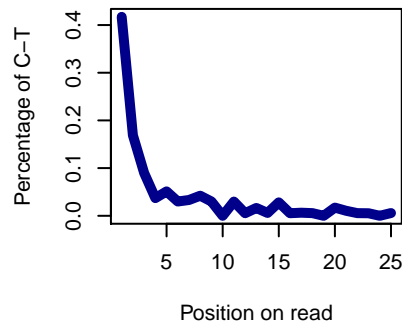

### UE1218 Eptesicus

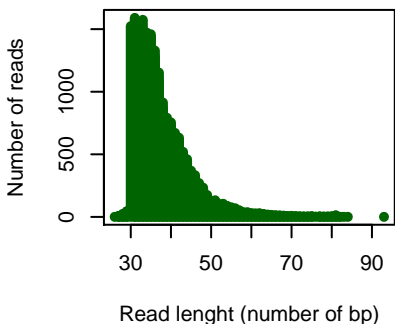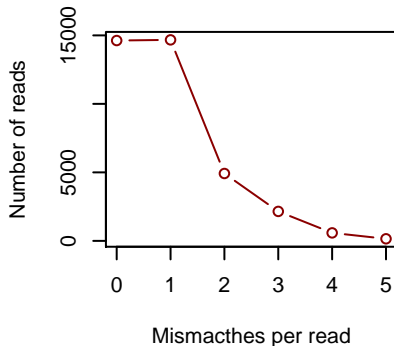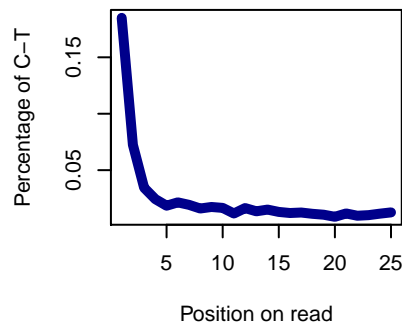

### UE1218 Equus[1]

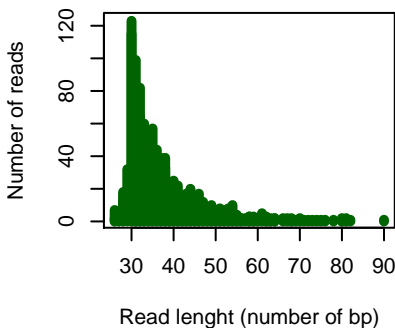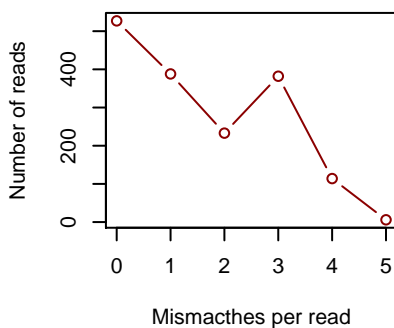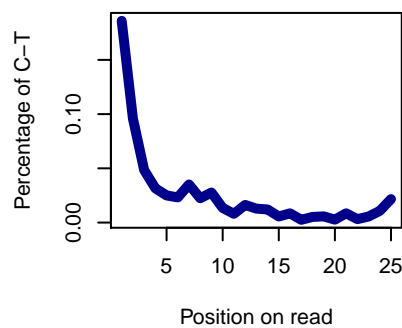

### UE1218 Equus[2]

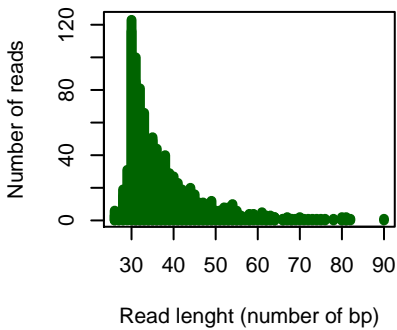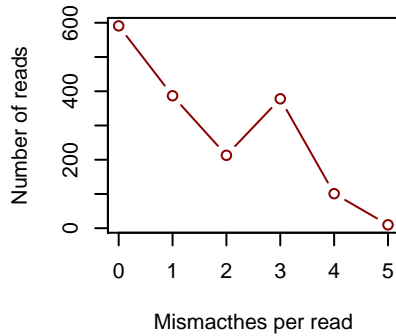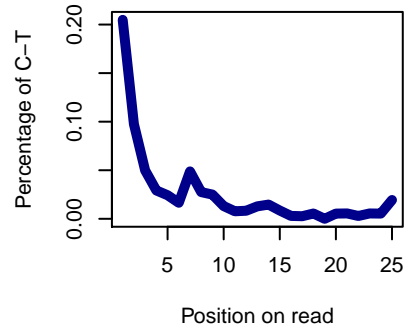

### UE1218 Ictidomys

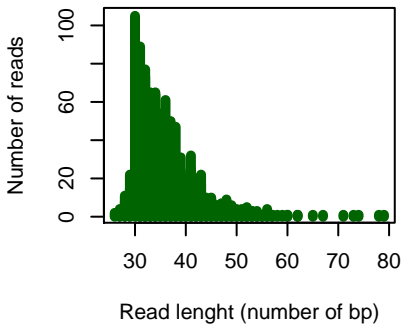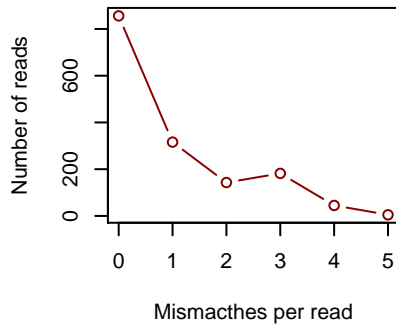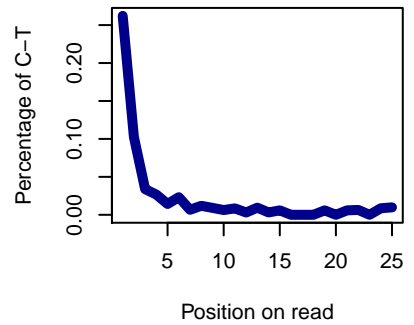

### UE1218 Marmota

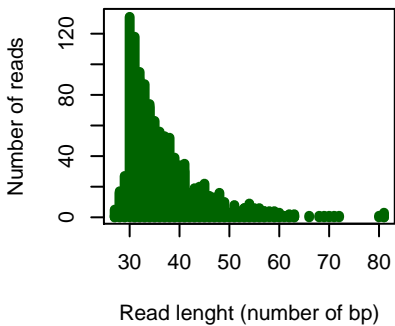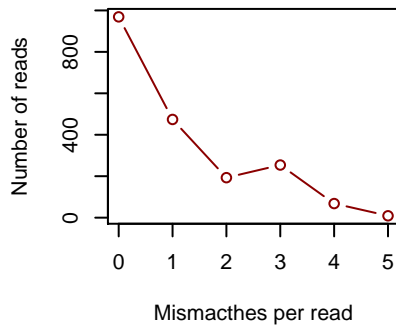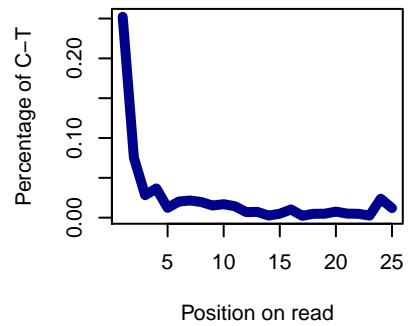

### UE1218 *Microtus*

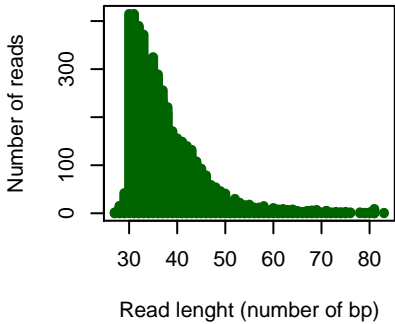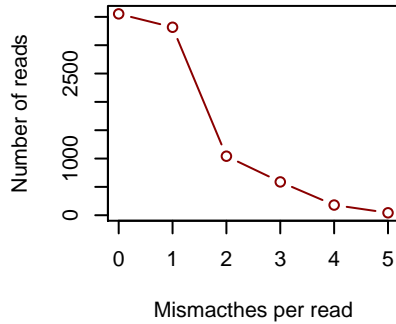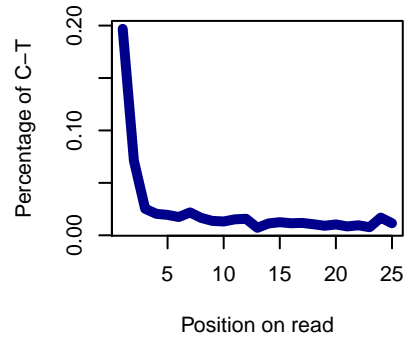

### UE1218 *Myotis*

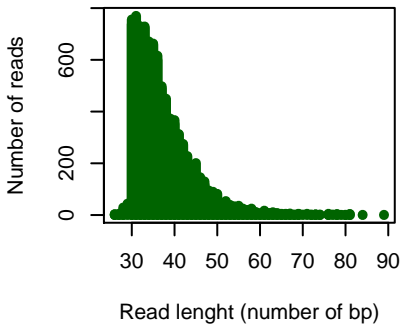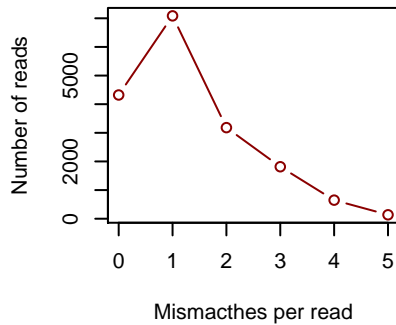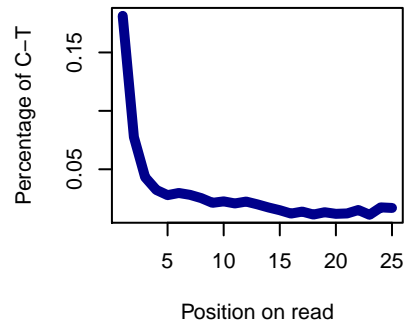

### UE1218 *Peromyscus*

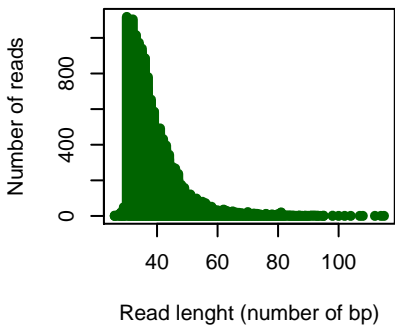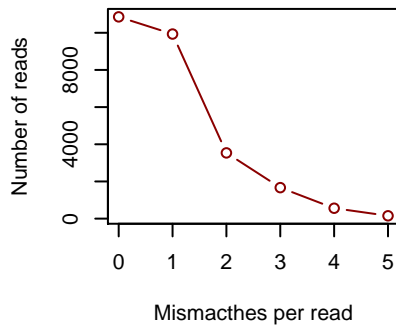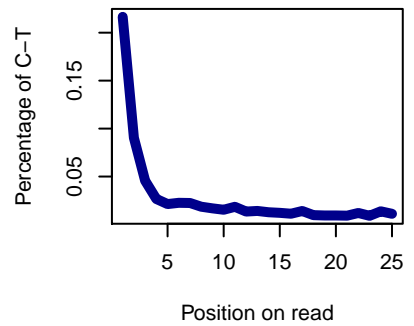

### UE1218 *Ursus*

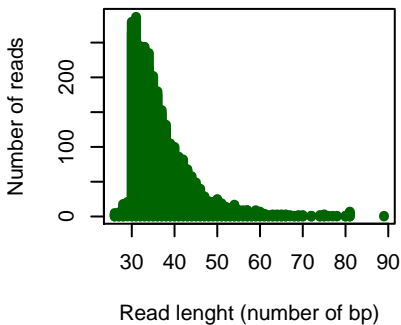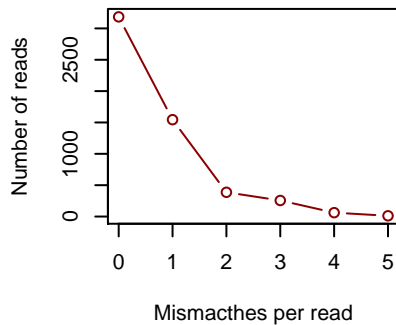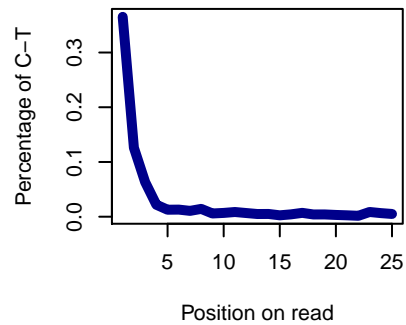

### UE1223 *Desmodus*

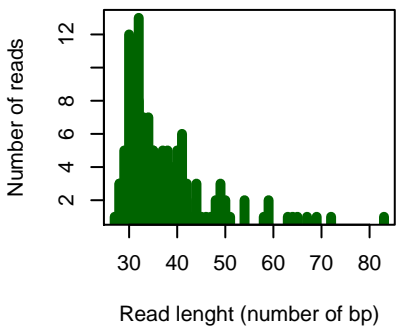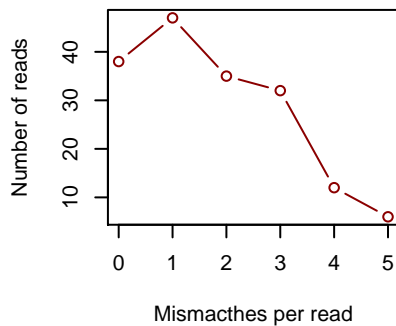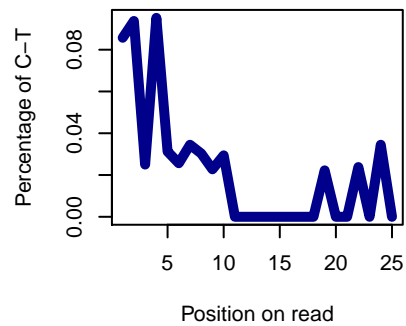

### UE1223 *Eptesicus*

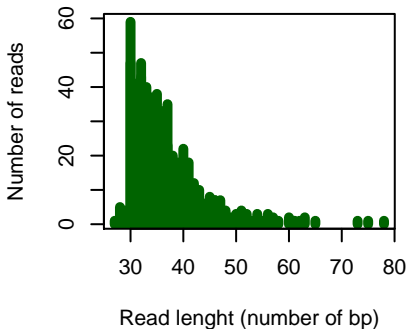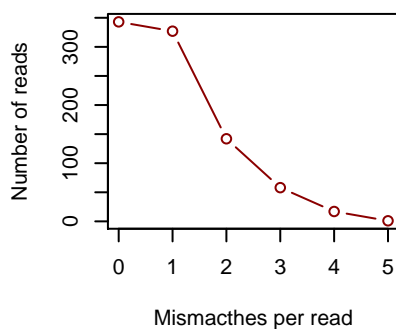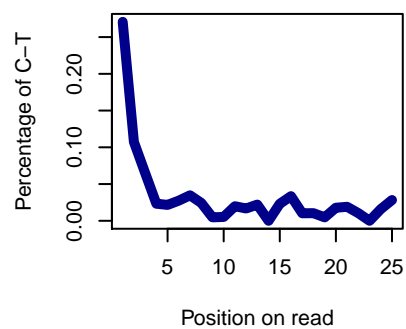

### UE1223 Equus[1]

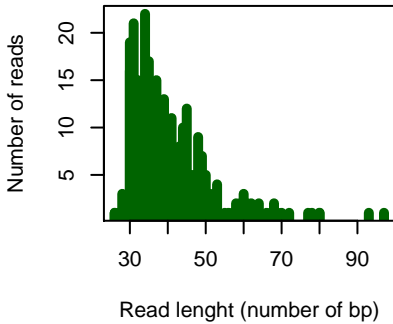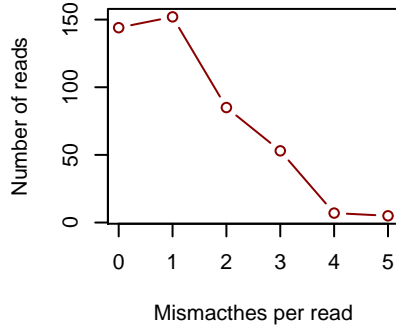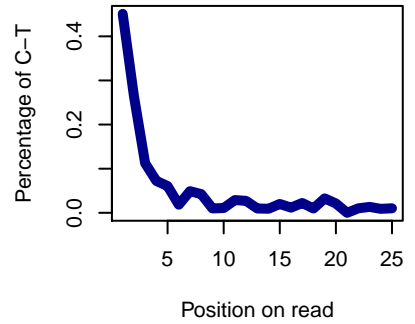

### UE1223 Equus[2]

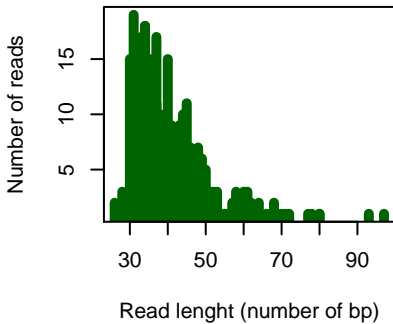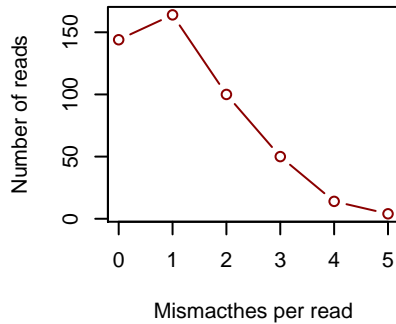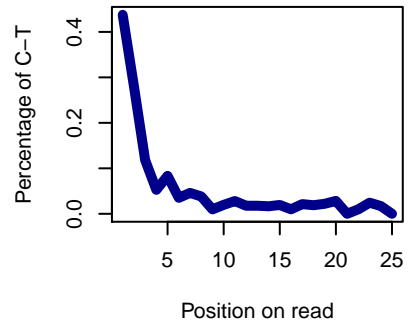

### UE1223 Ictidomys

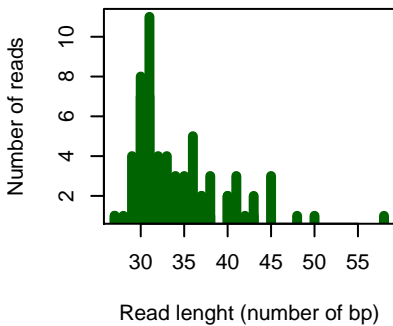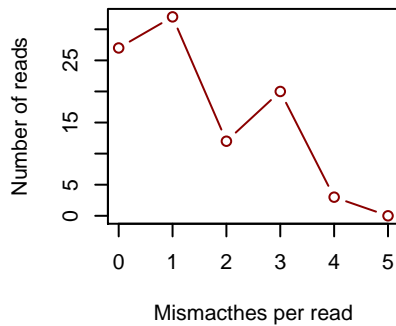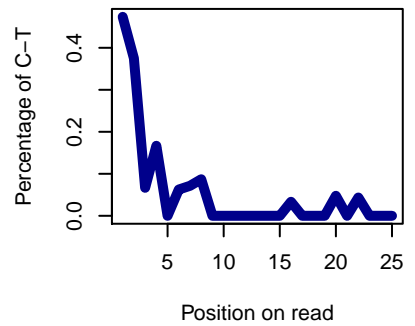



### UE1223 *Microtus*

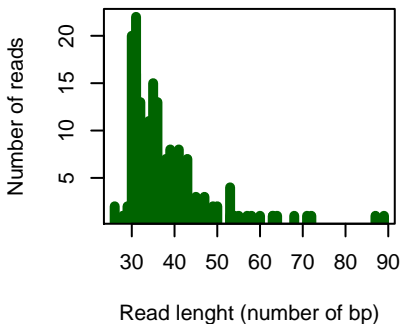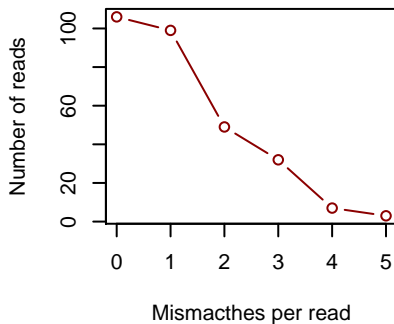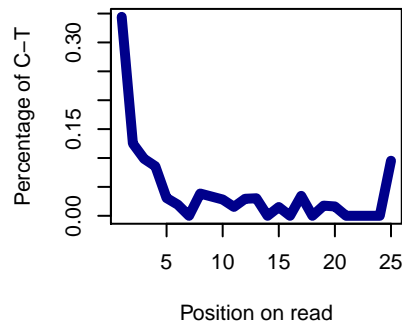

### UE1223 *Myotis*

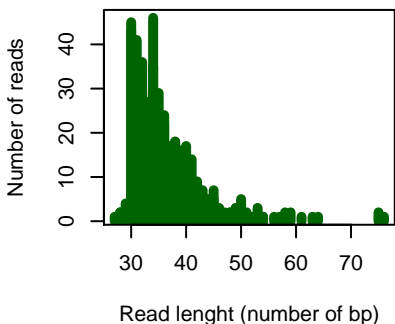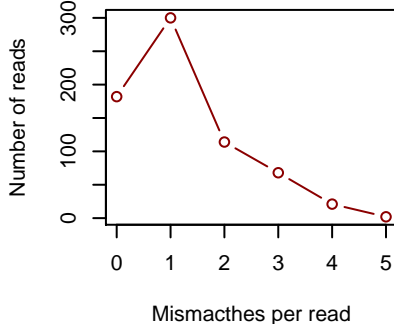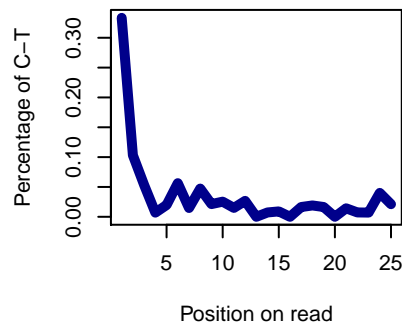

### UE1223 *Peromyscus*

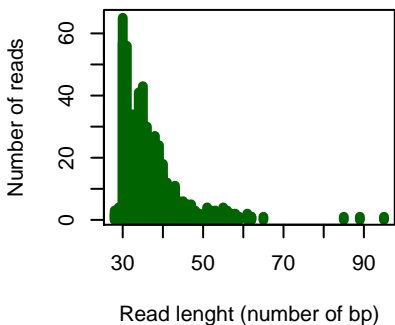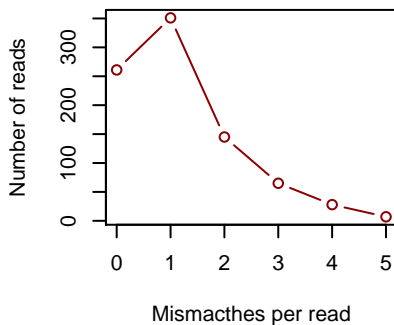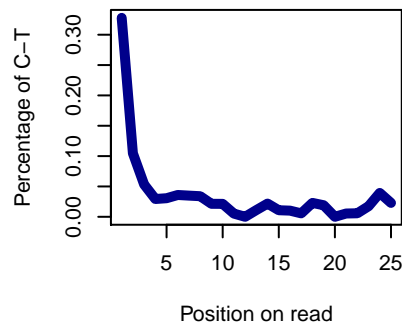

### UE1223 Urocitellus

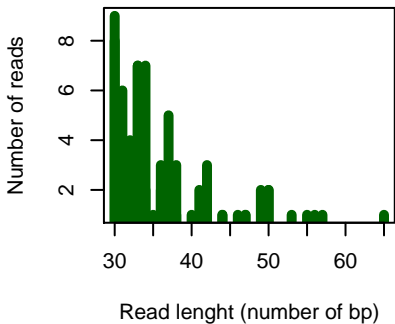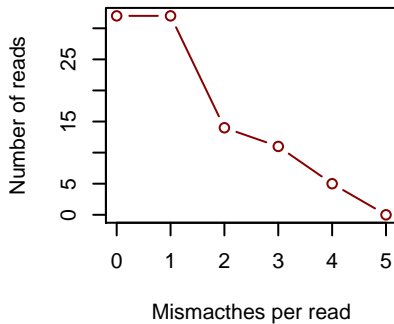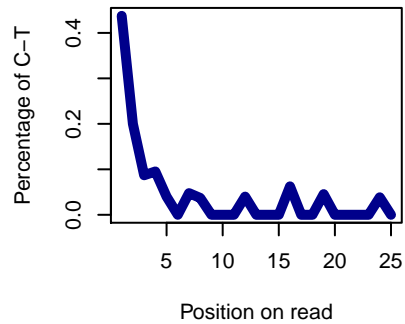

### UE1223 Ursus

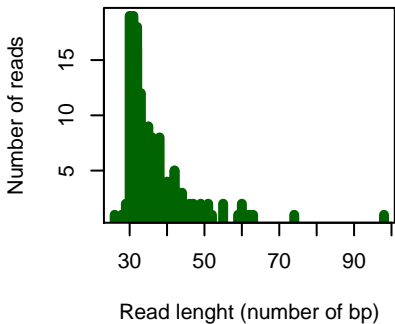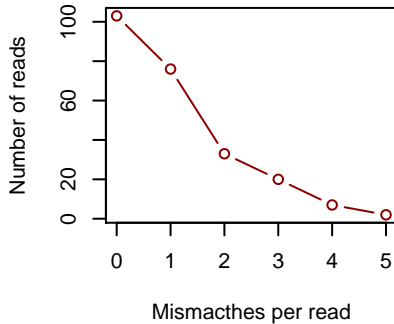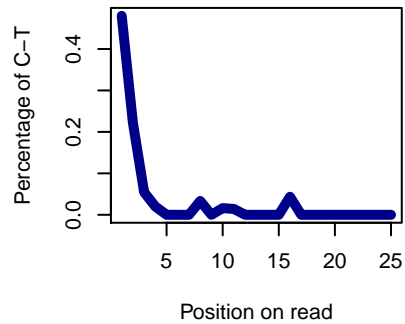

Supplement: 41586_2020_2509_MOESM3_ESM.pdf [file 41586_2020_2509_MOESM3_ESM.pdf]
