# Supplementary material for: Evidence of human occupation in Mexico around the Last Glacial Maximum
Source: Springer Nature journal article supplement (doi:10.1038/s41586-020-2509-0), 2020-07-22

**Supplementary file 3. This file contains plots used in the assessment of ancient DNA authentication for the plant taxa found.** The first column contains the read length distribution (in Bp) of the reads aligning to the reference (see supplementary metadata file), the second columns plots the number of mismatches (edit distance) of each read to the same reference. In the third column, the fraction of C-T transitions due to DNA damage, as calculated by mapDamage2.0, is plotted. Each new row contains a new species from a specific layer.

### UE1204 Asparagus

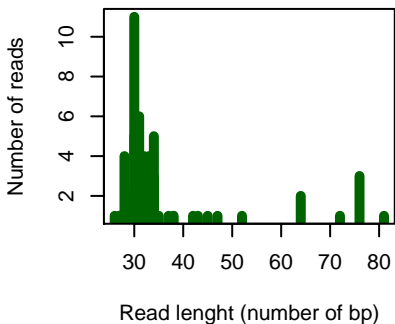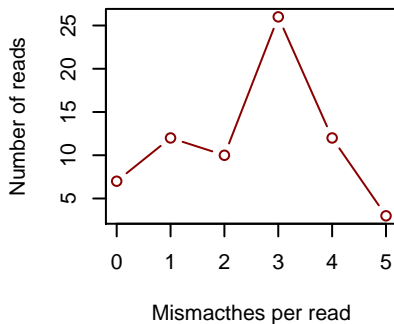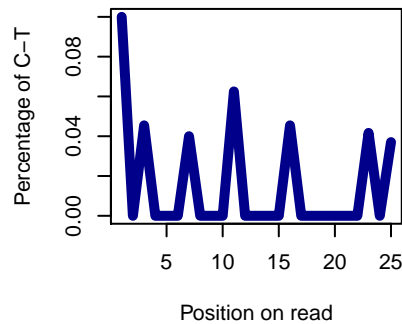

### UE1204C Abies

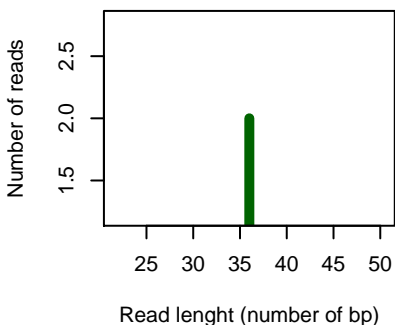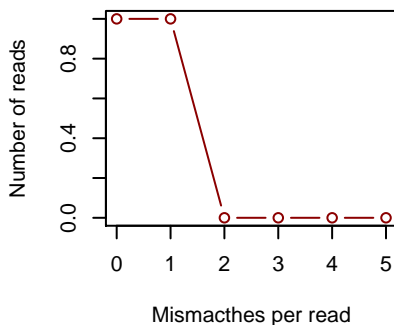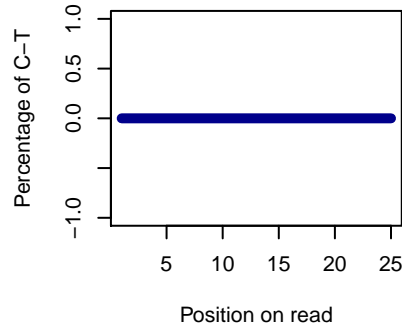

### UE1204C Asparagus

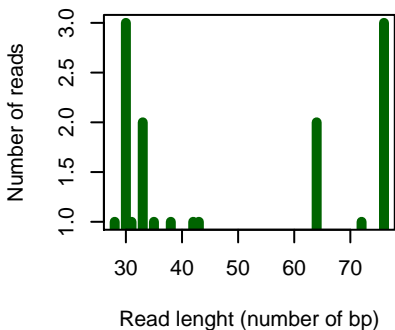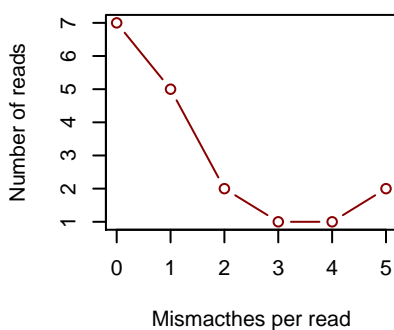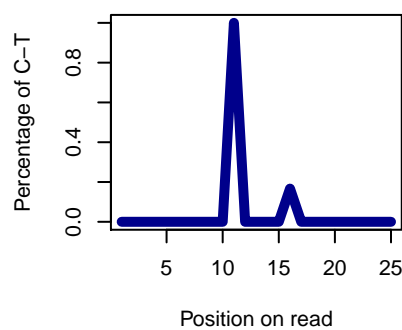

### UE1204C *Helianthus*

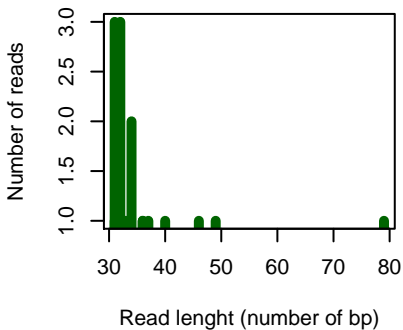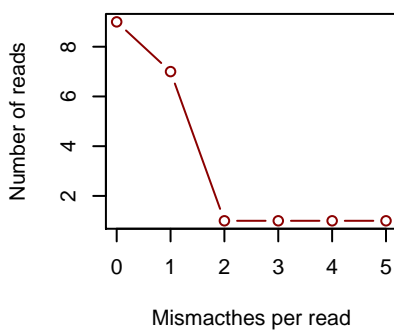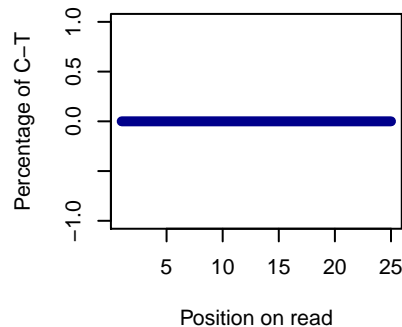

### UE1204 *Chlamydomonas*

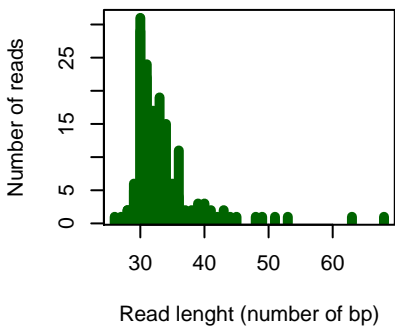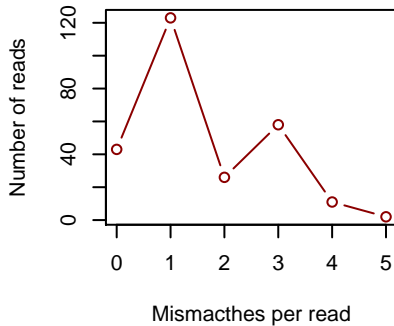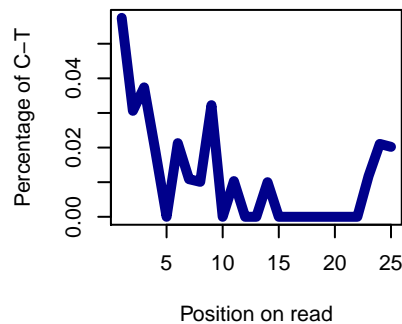

### UE1204C *Lolium*

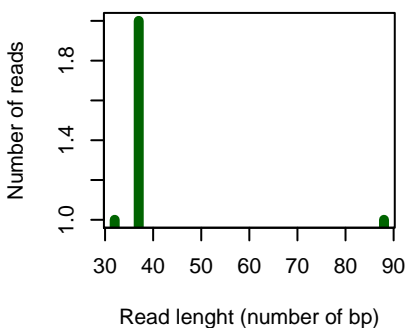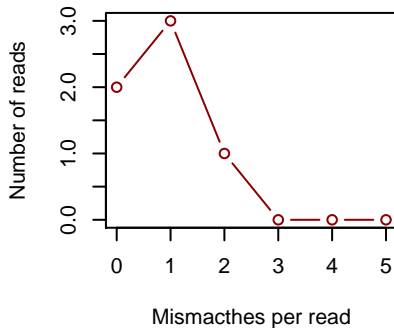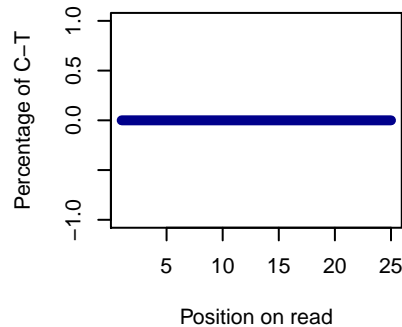

### UE1204C Medicago

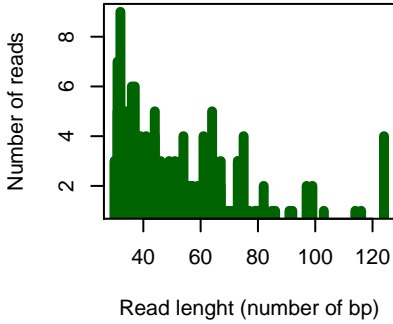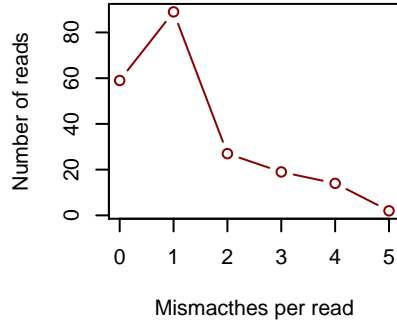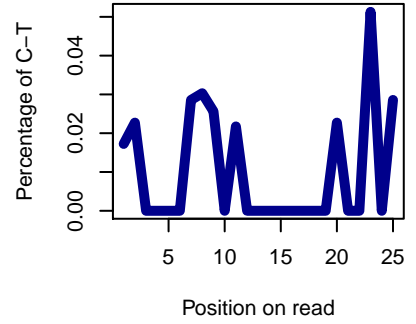

### UE1204C Phaseolus

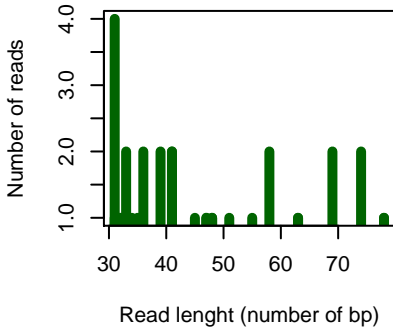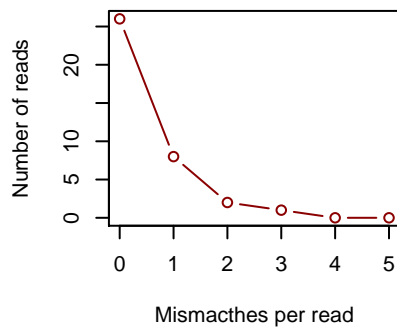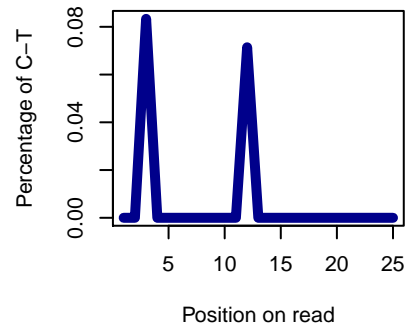

### UE1204C Pinus

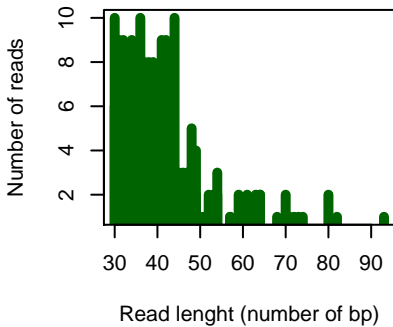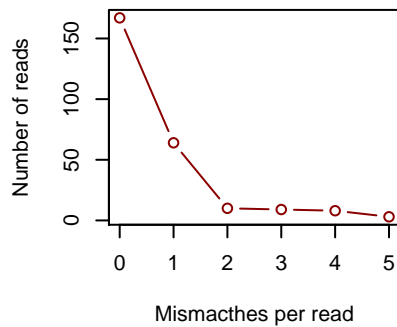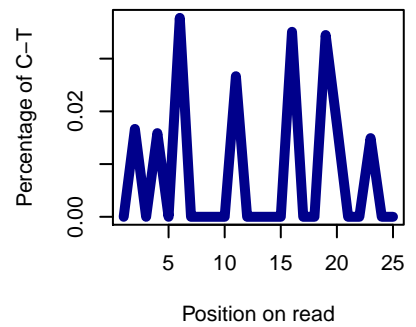

### UE1204C Sorghum

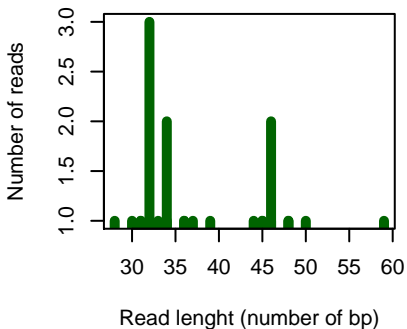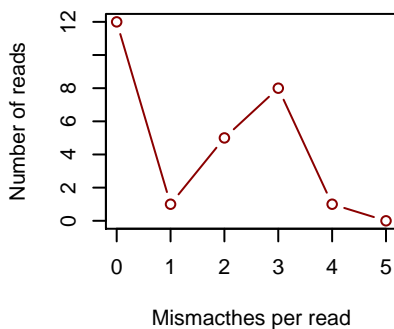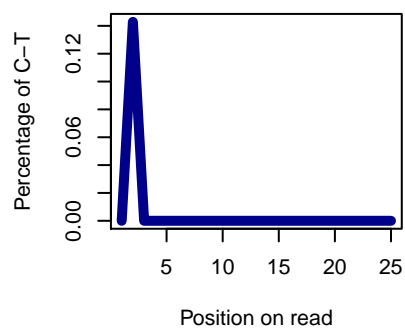

### UE1204C Strobilus

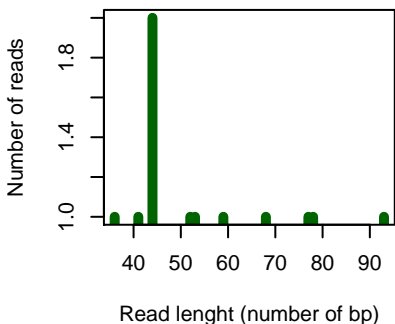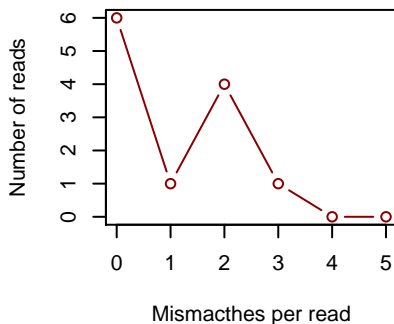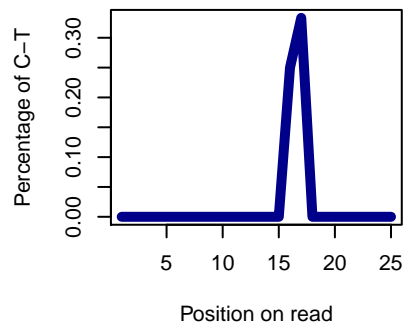

### UE1204 Helianthus

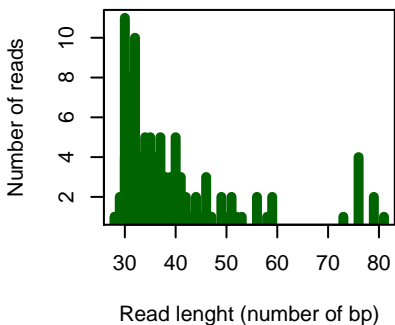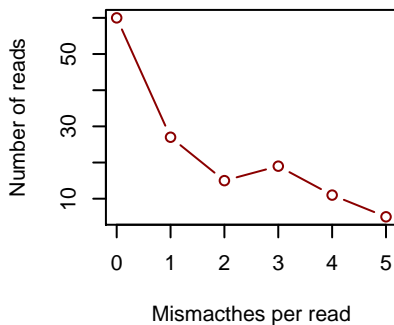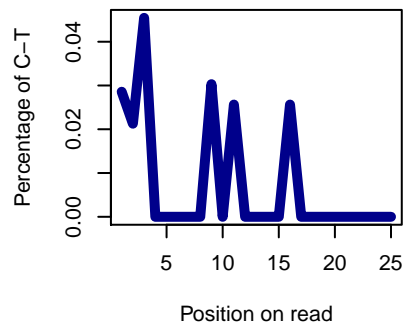

### UE1204 Hordeum

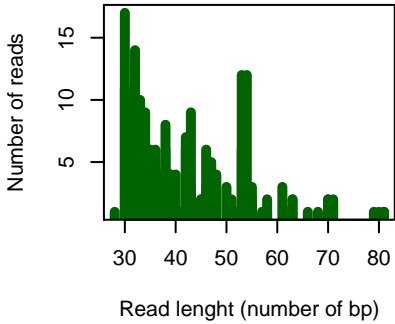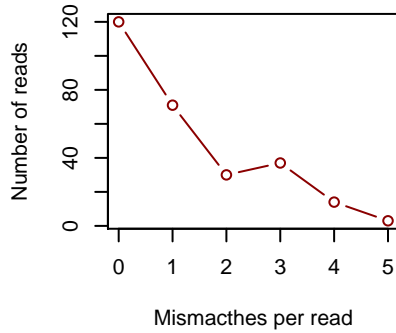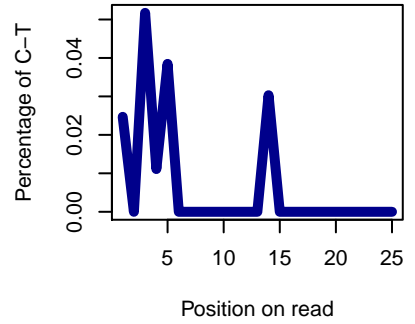

### UE1204 Medicago

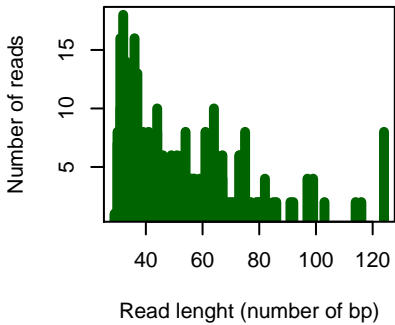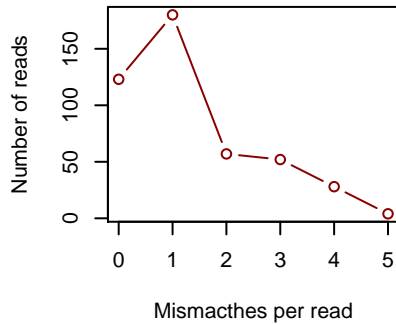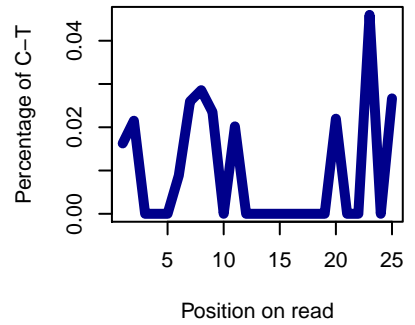

### UE1204 Pinus

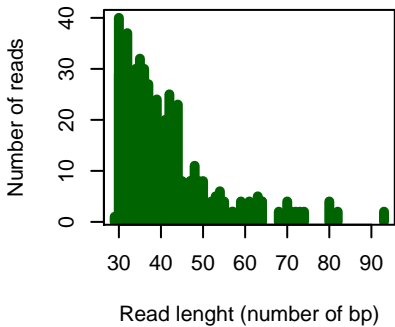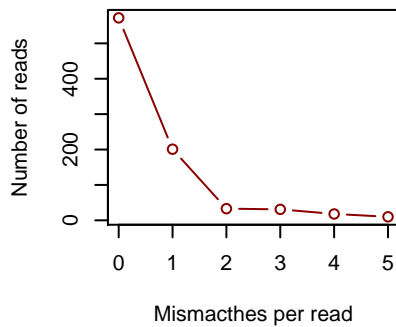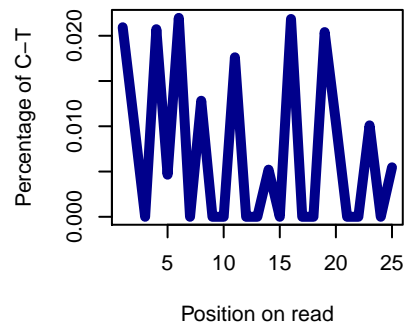

### UE1204 Sorghum

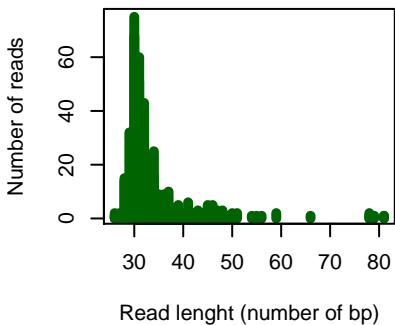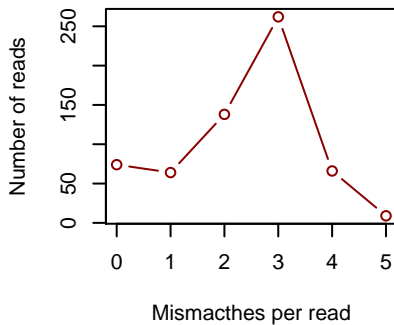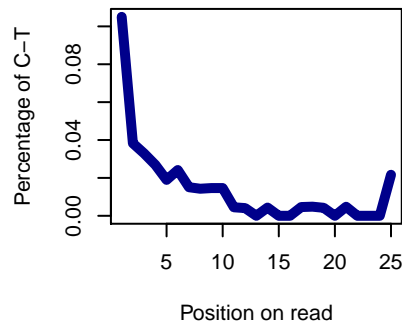

### UE1204 Zea

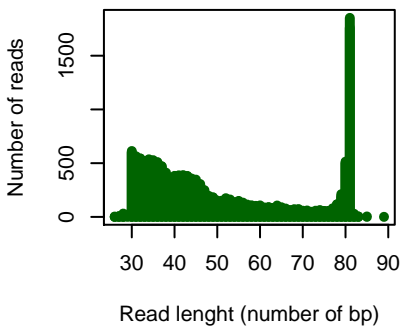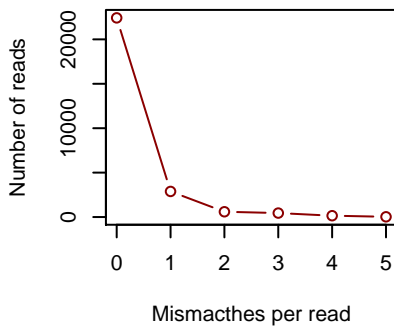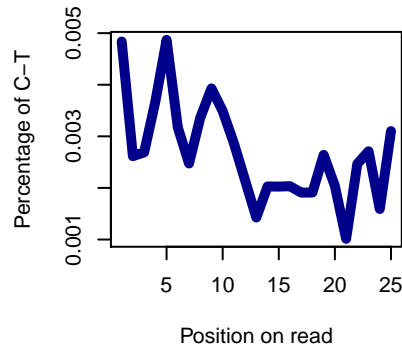

### UE1207A Abies

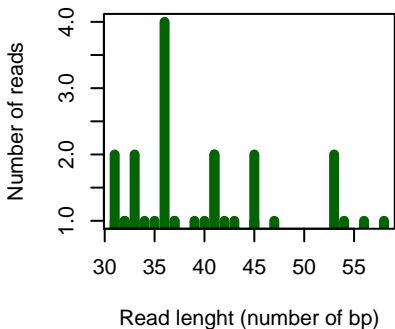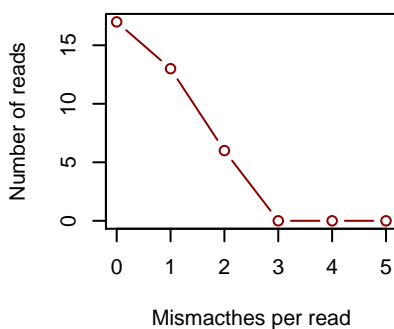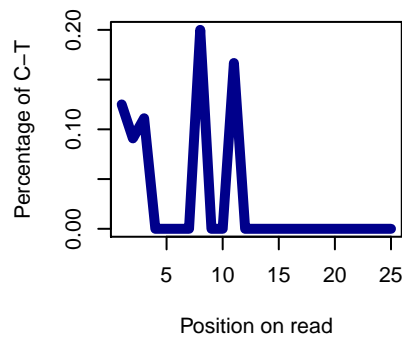

### UE1207A *Castilleja*

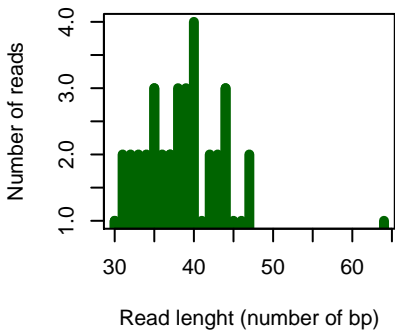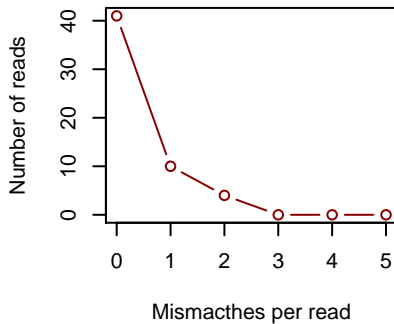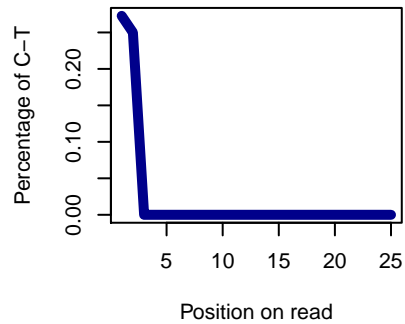

### UE1207A *Hordeum*

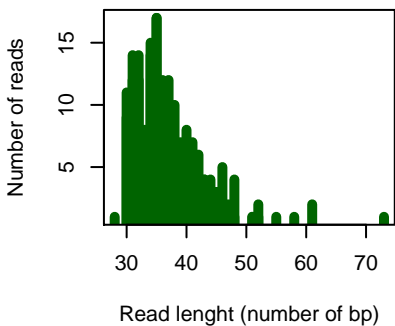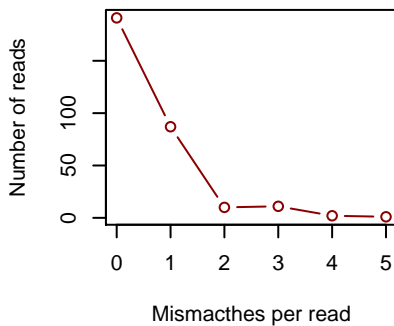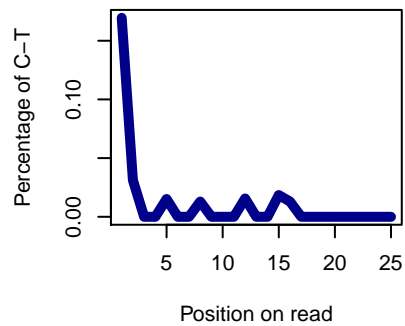

### UE1207A *Lolium*

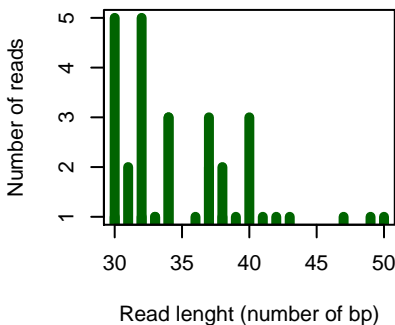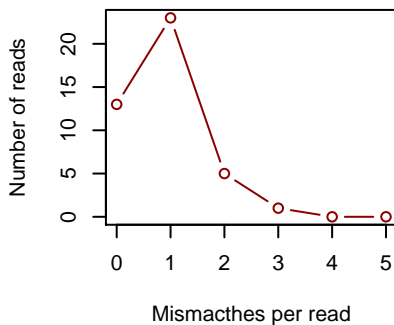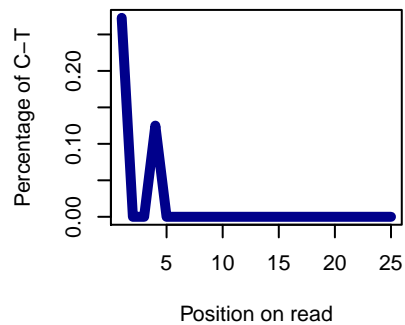



### UE1207A Pinus

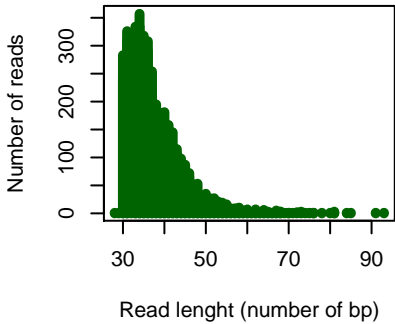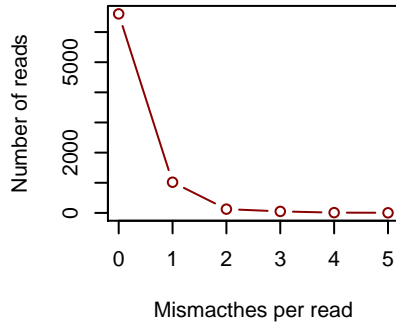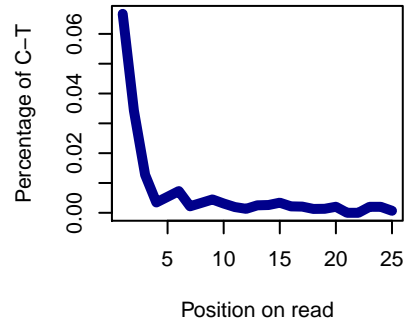

### UE1207A Solanum

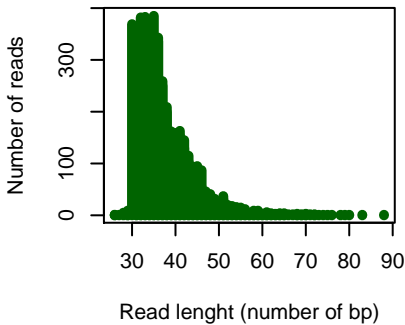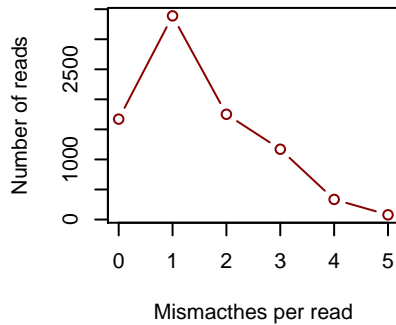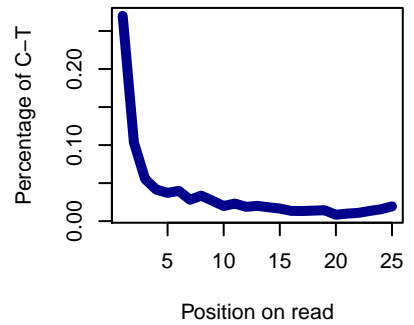

### UE1207C Abies

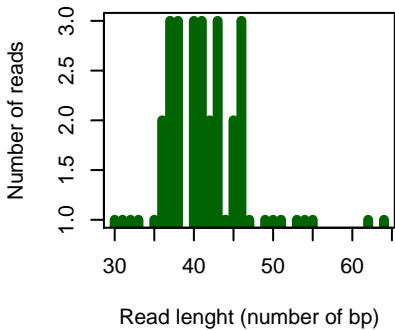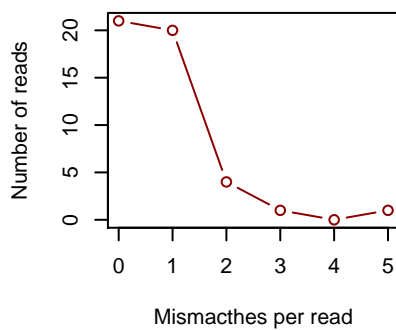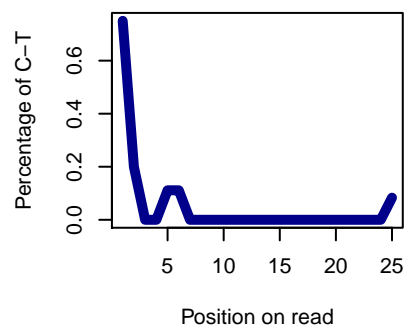

### UE1207C Brachypodium

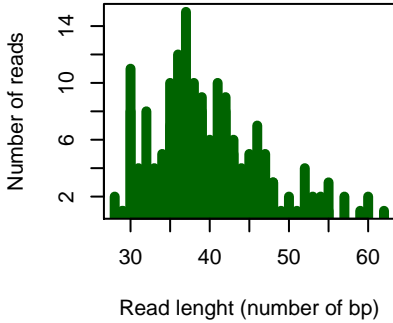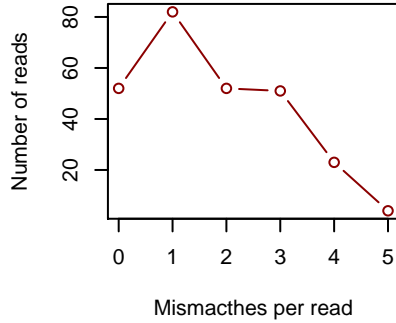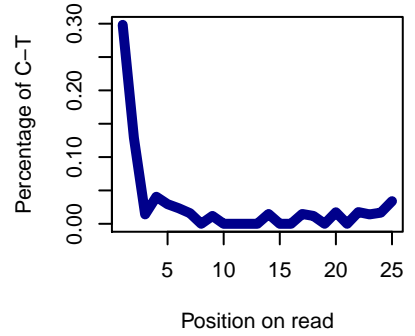

### UE1207C Hordeum

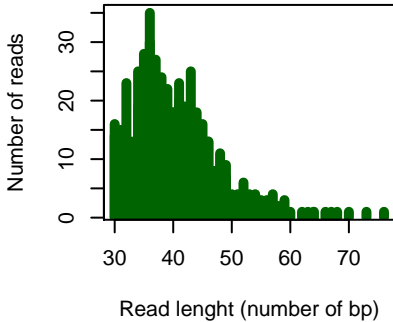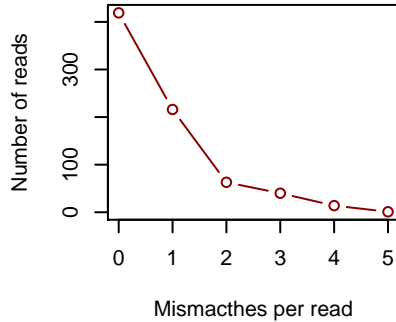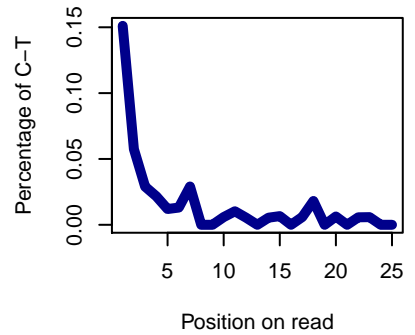

### UE1207C Lolium

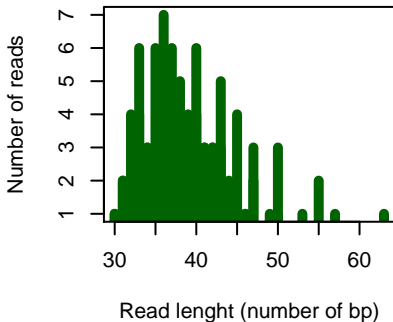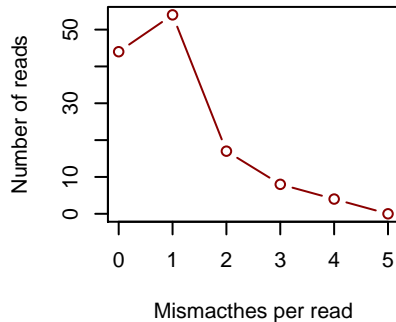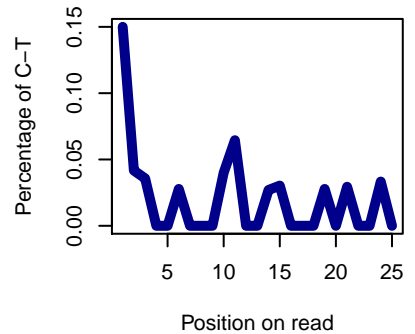

### UE1207C Pinus

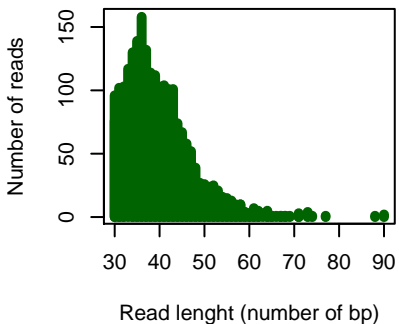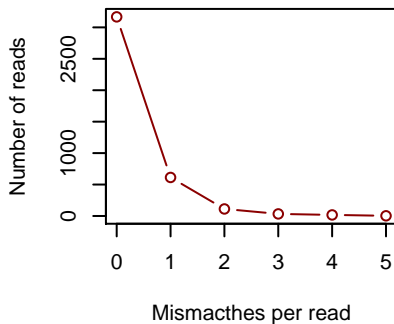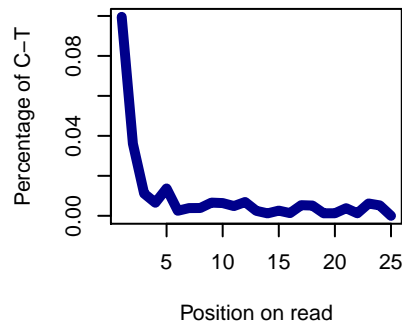

### UE1207C Solanum

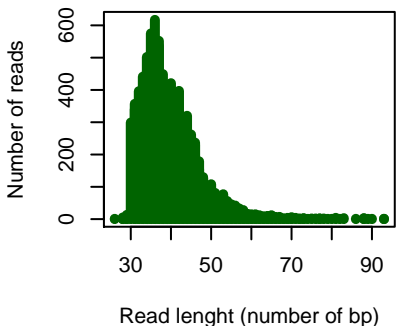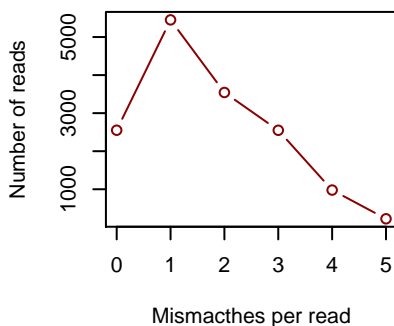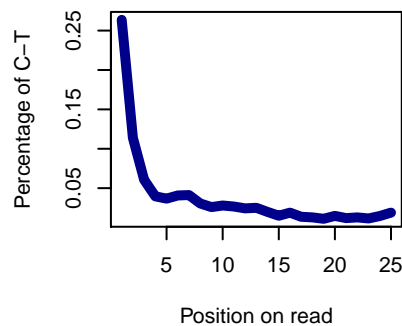

### UE1208 Abies

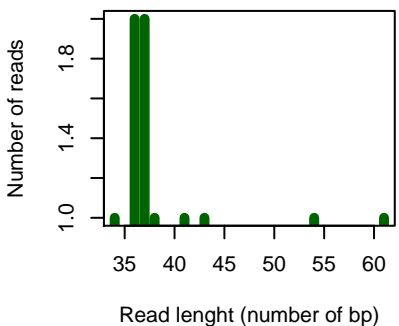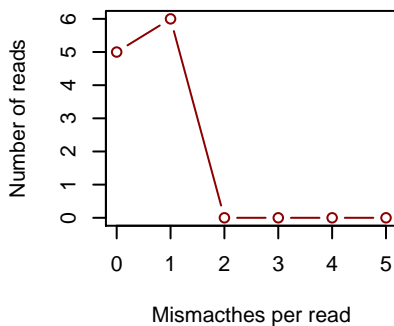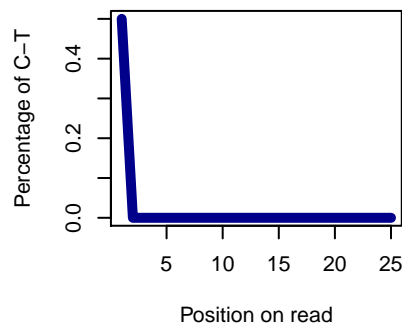

### UE1208 Brachypodium

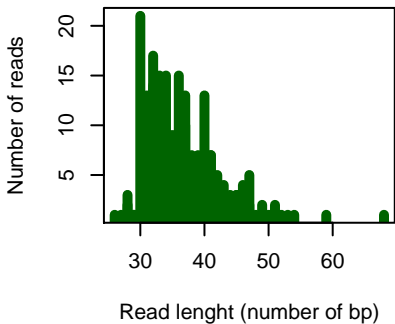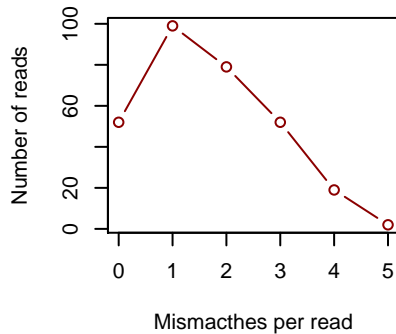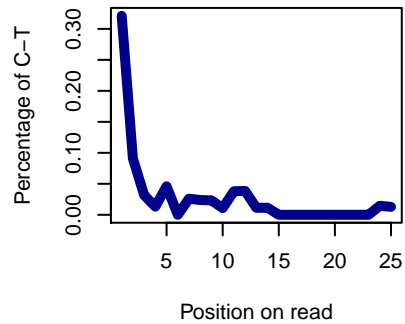

### UE1208 Hordeum

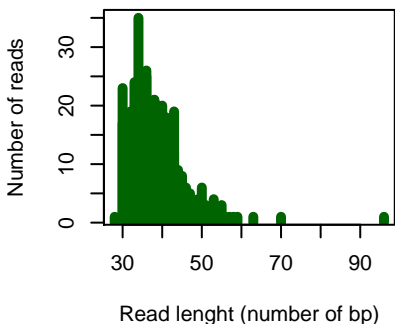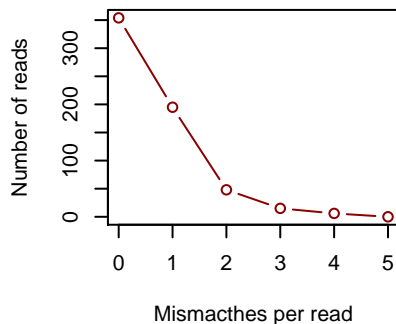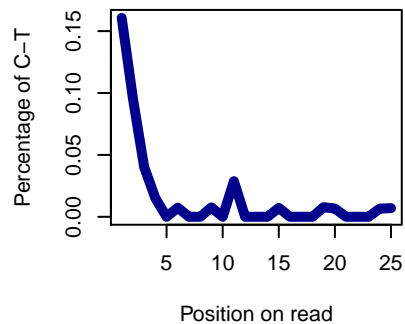

### UE1208 Lolium

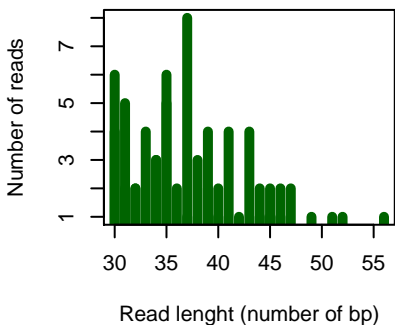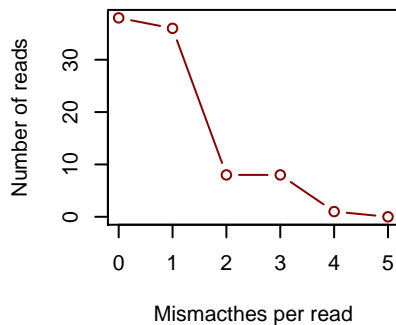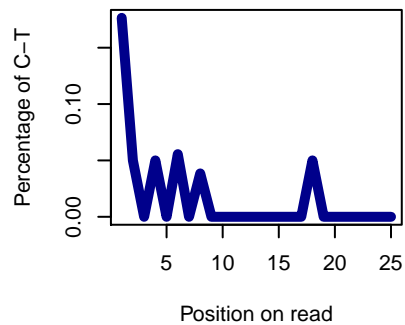

### UE1208 Pinus

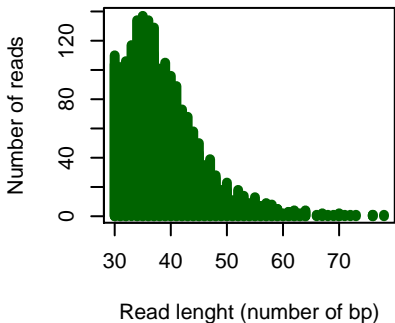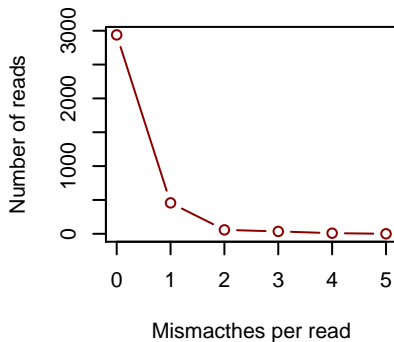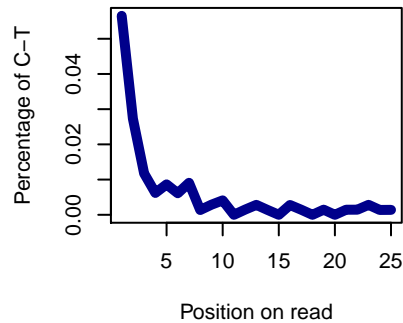

### UE1208 Solanum

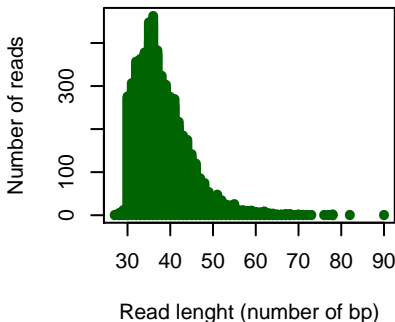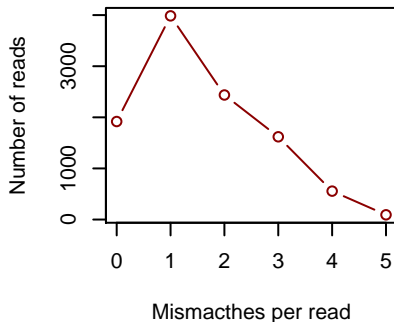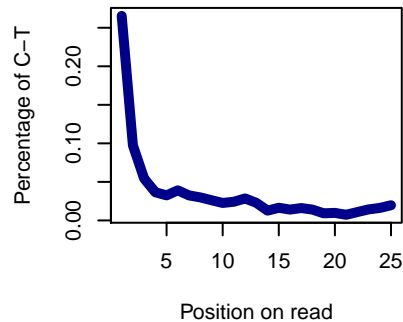

### UE1210 Abies

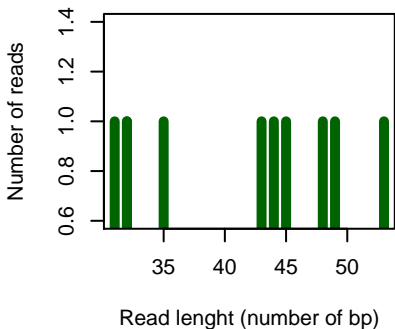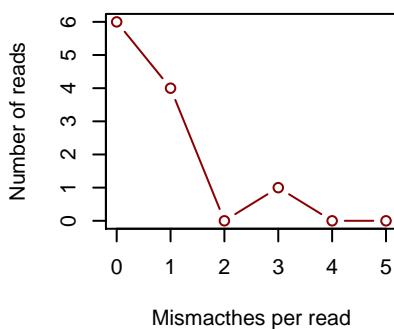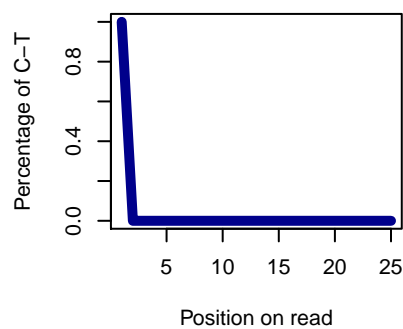

### UE1210 Auxenochlorella

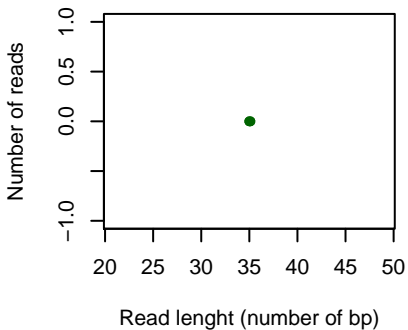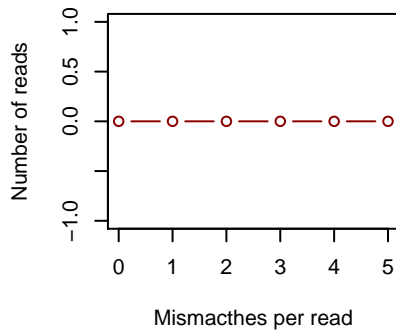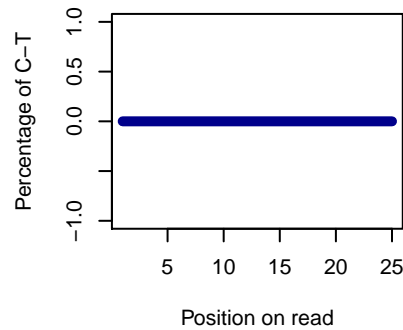

### UE1210 Chlamydomonas

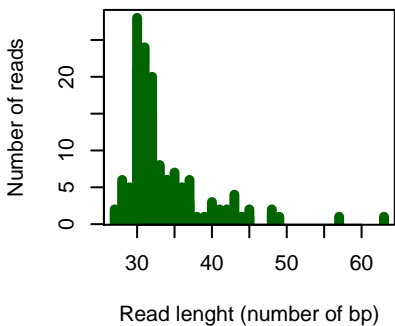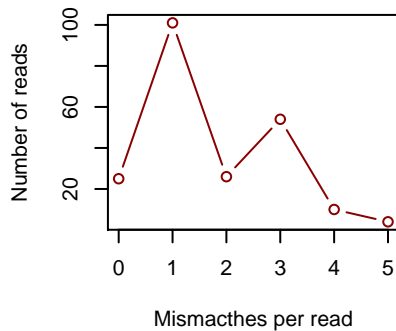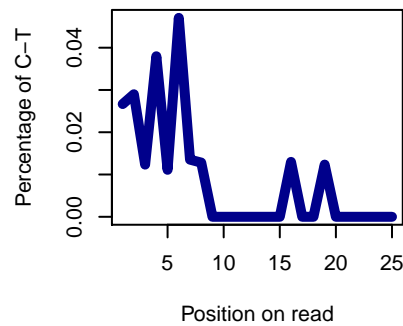

### UE1210 Chlorella

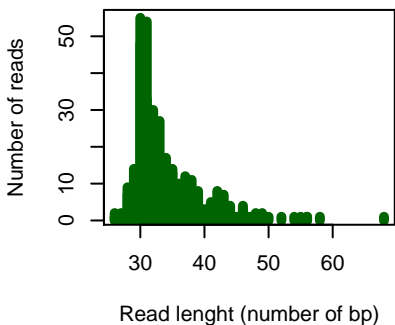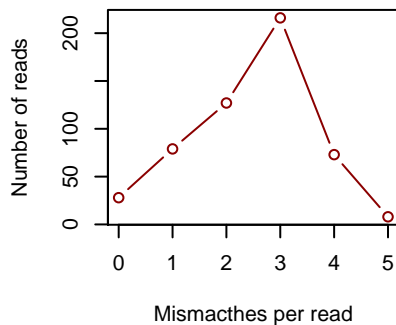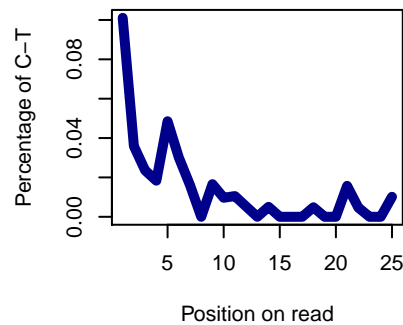

### UE1210 Hordeum

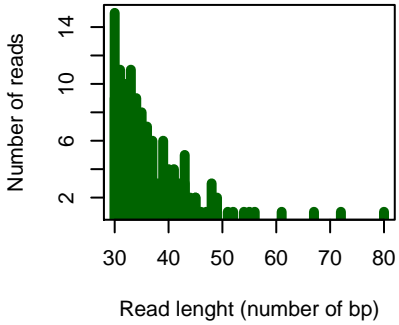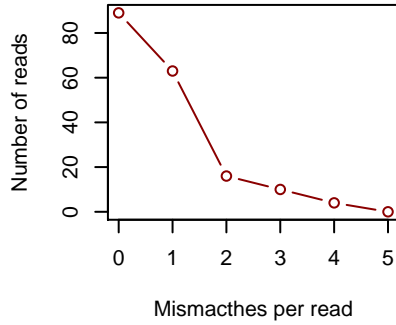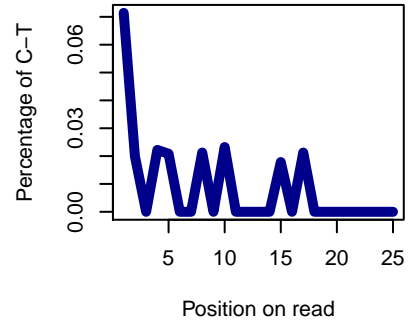

### UE1210 Lolium

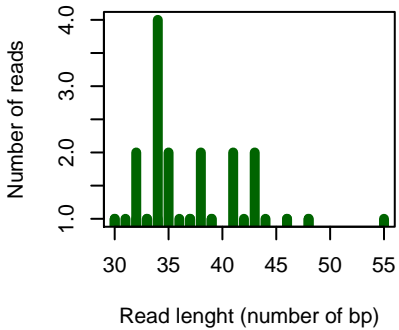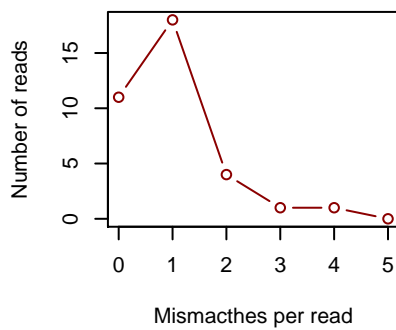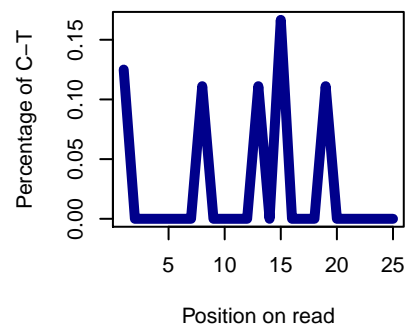

### UE1210 Micromonas

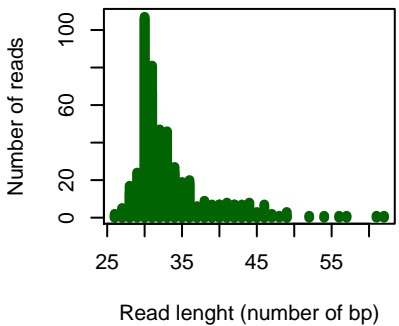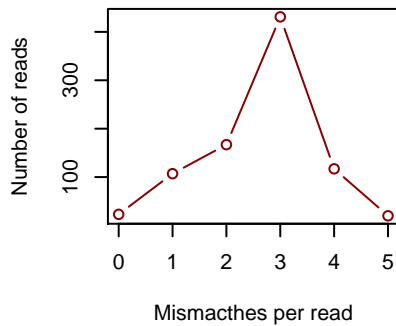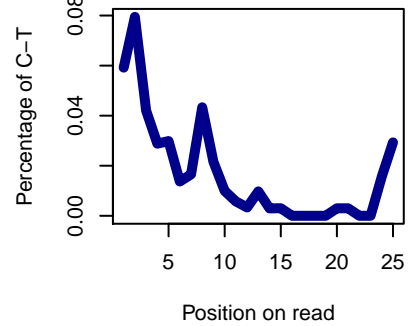

### UE1210 Monoraphidium

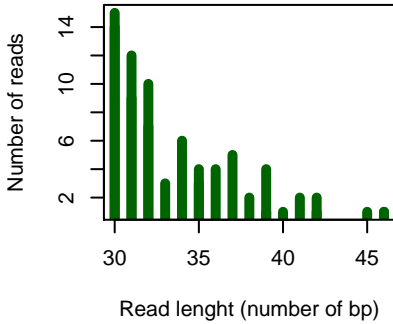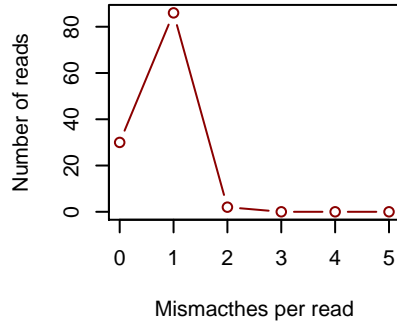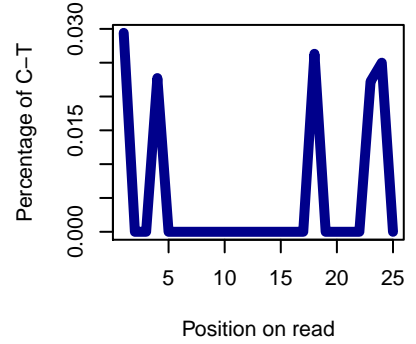

### UE1210 Pinus

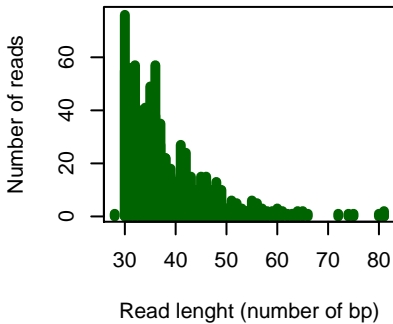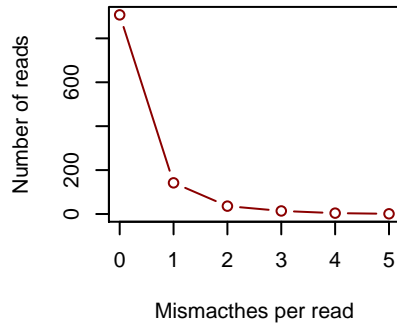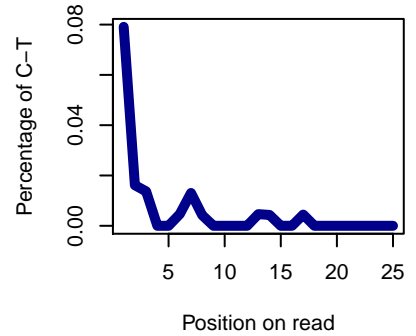

### UE1210 Prasiola

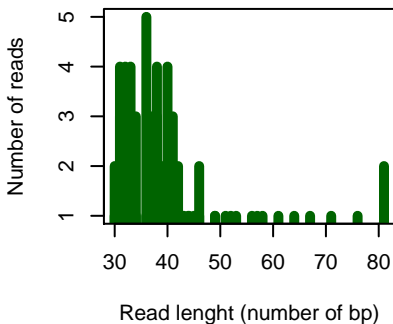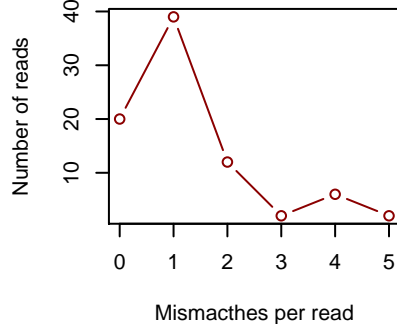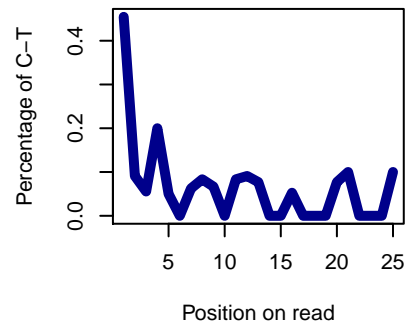



### UE1210 Solanum

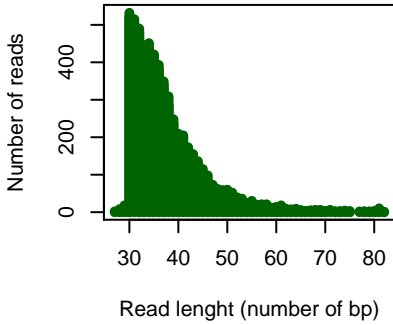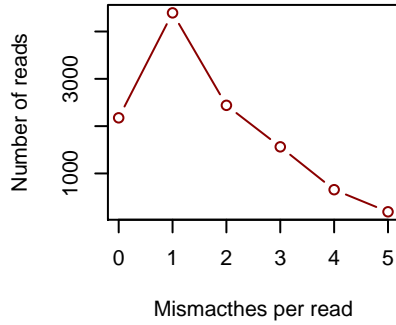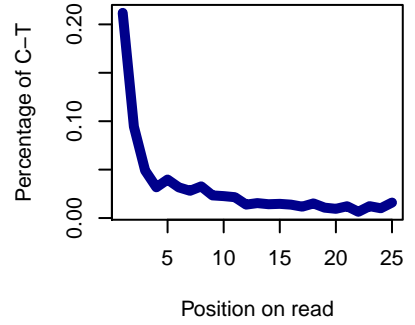

### UE1210 Trebouxia

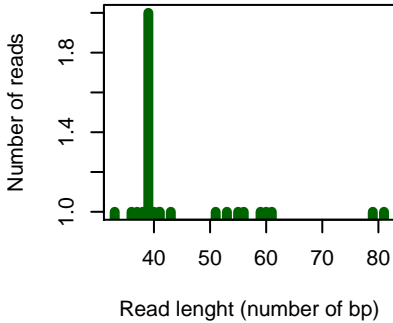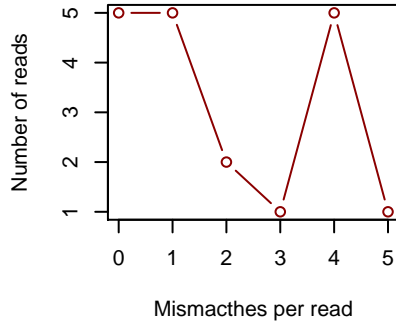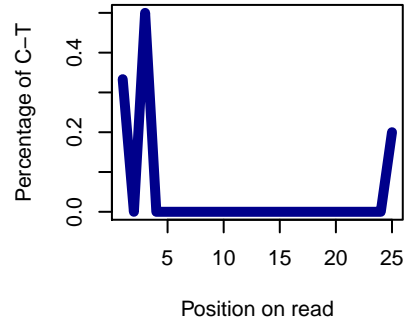

### UE1212 Abies

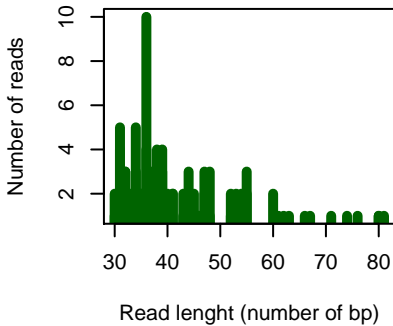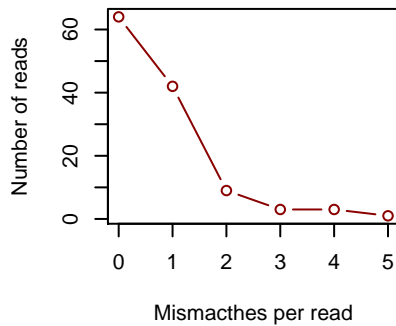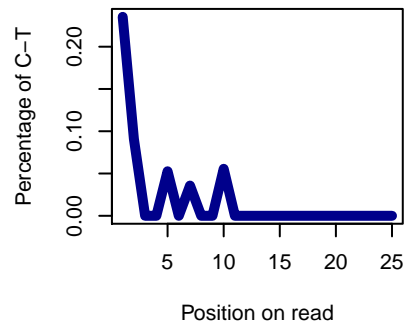

### UE1212 Chlamydomonas

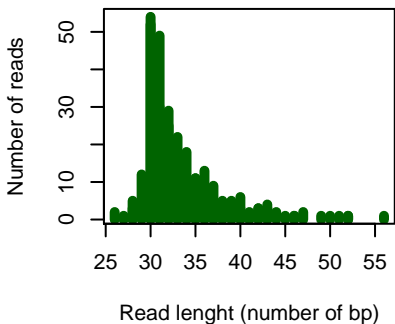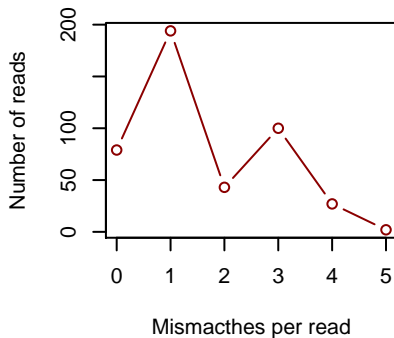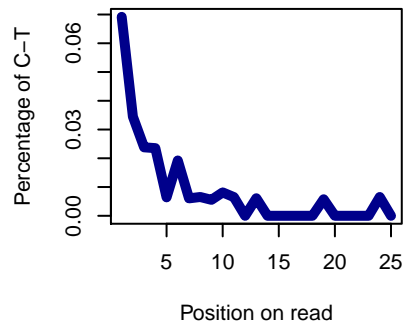

### UE1212 Hordeum

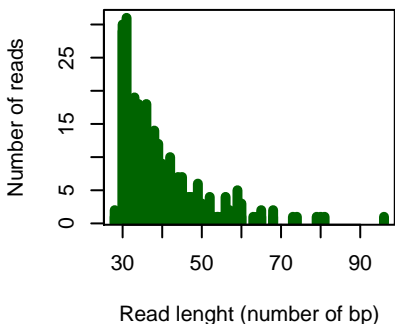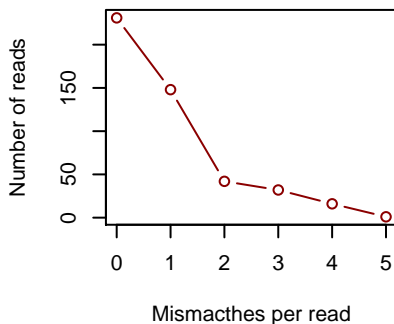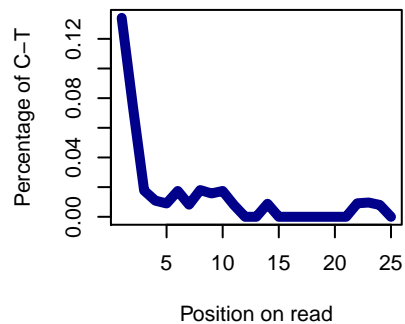

### UE1212 Juniperus

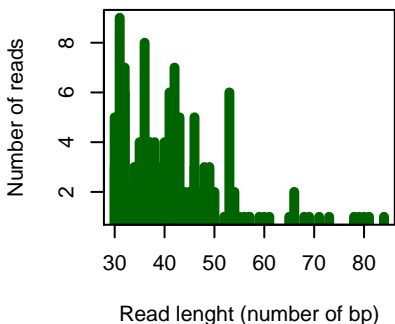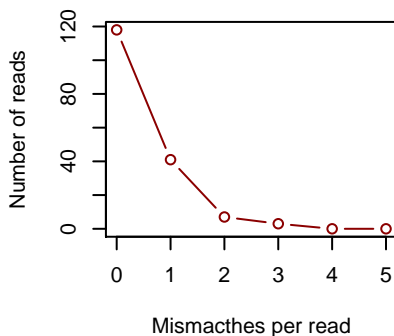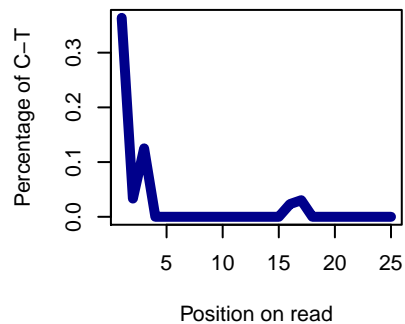

### UE1212 Lolium

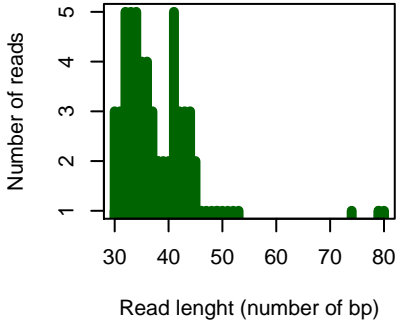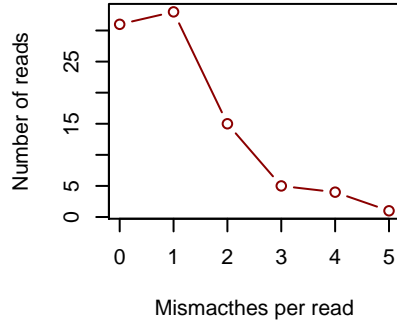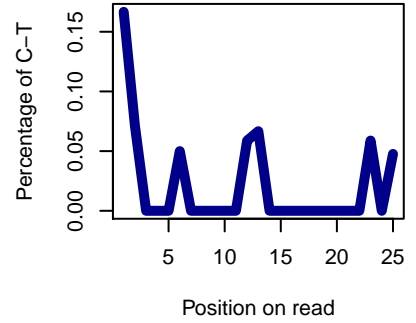

### UE1212 Pinus

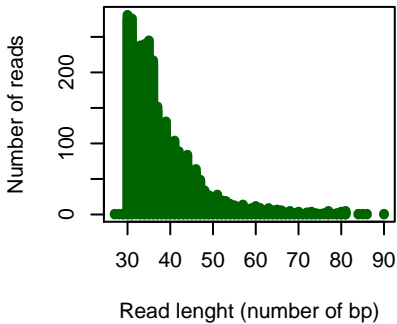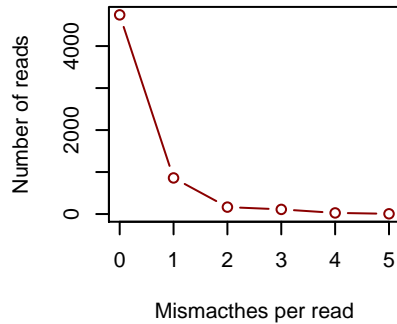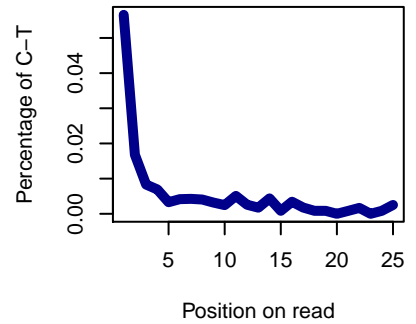

### UE1212 Prasiola

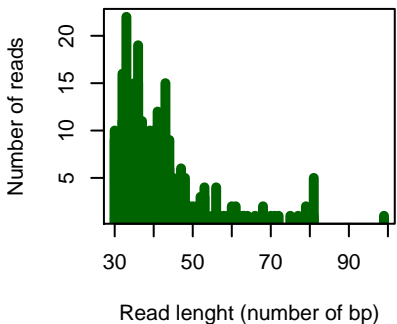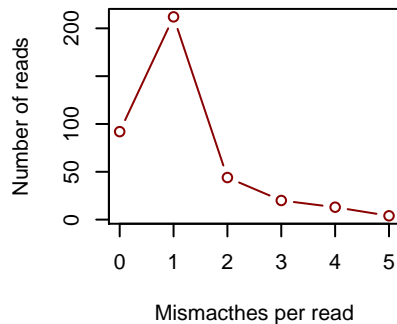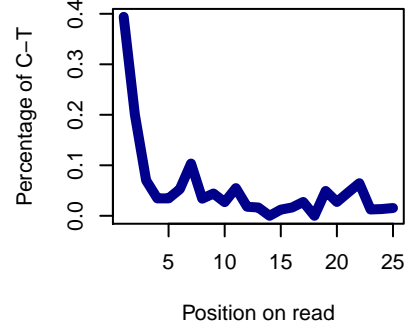

### UE1212 Solanum

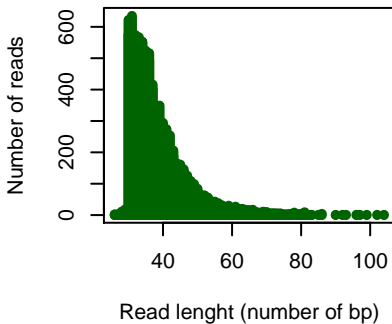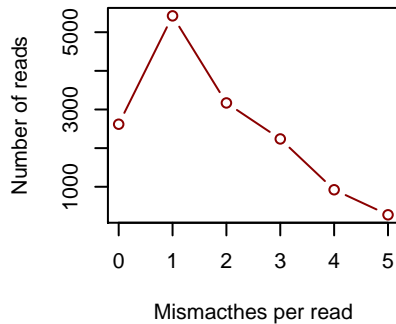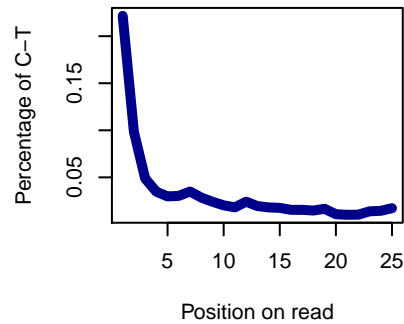

### UE1212 Strobus

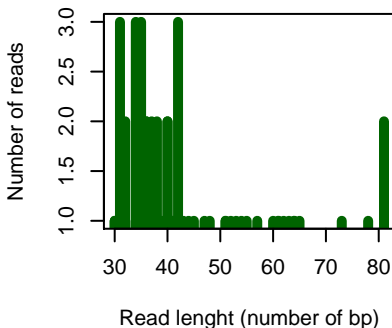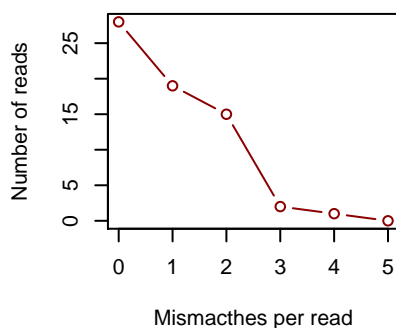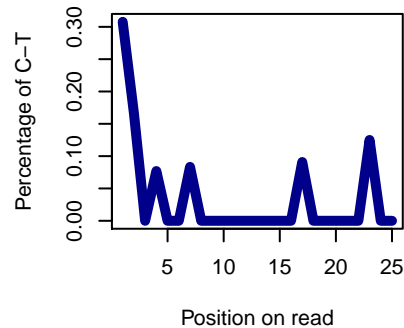

### UE1212 Trebouxia

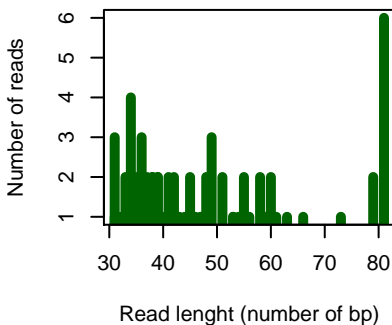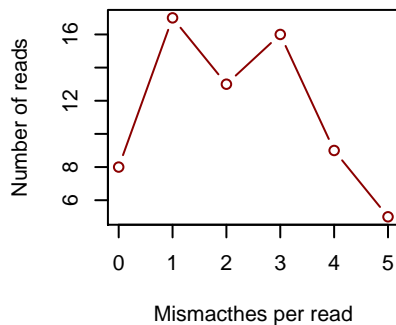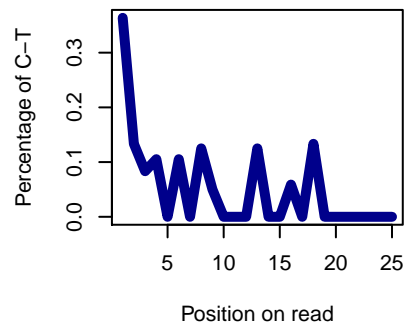

### UE1215 Abies

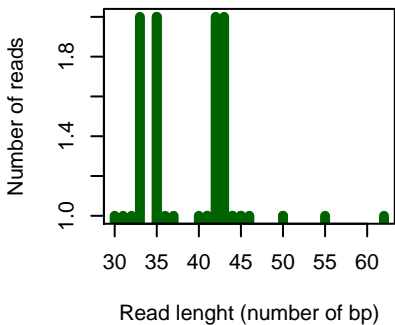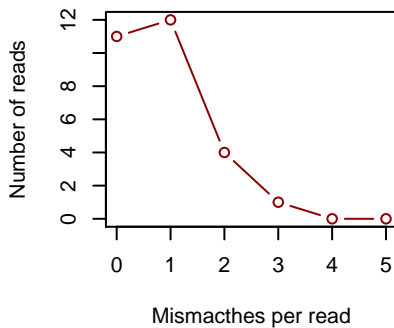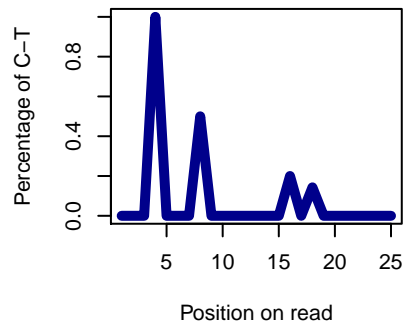

### UE1215 Brachypodium

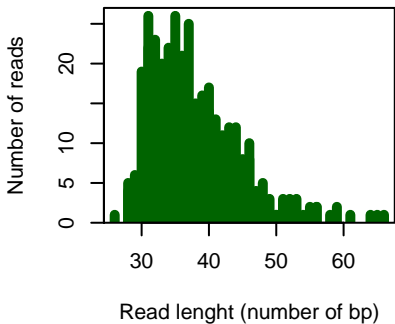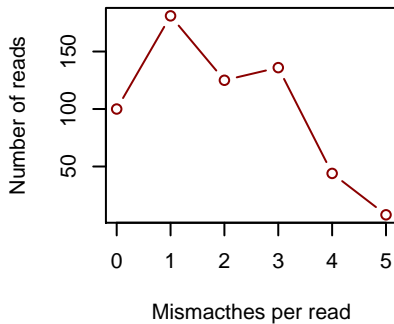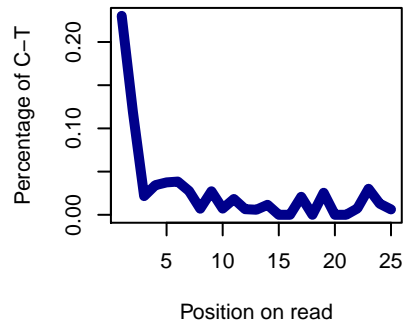

### UE1215 Castilleja

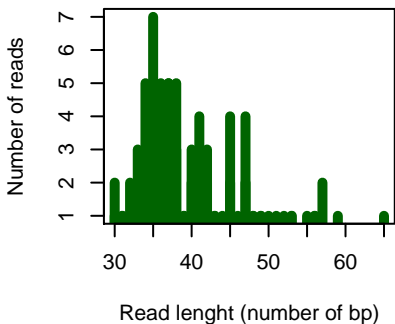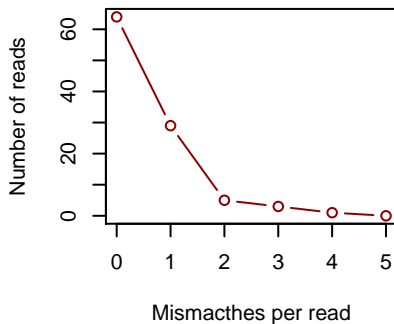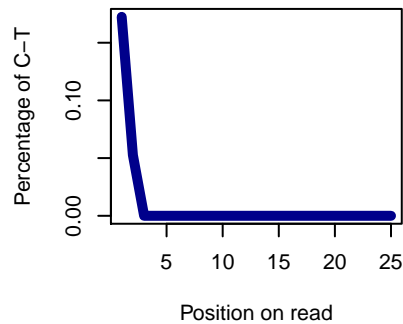

### UE1215 Hordeum

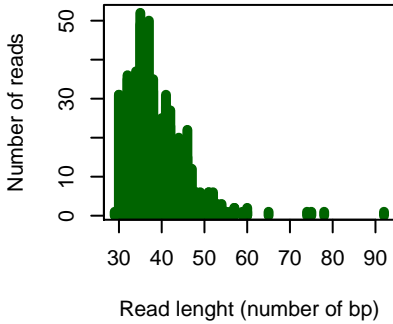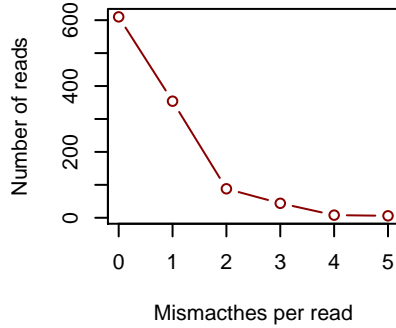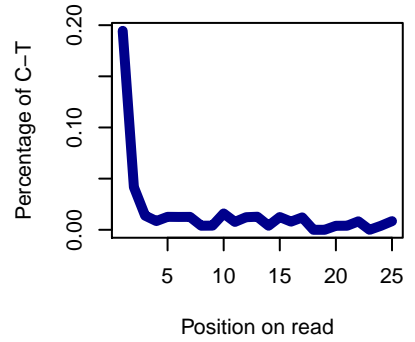

### UE1215 Juniperus

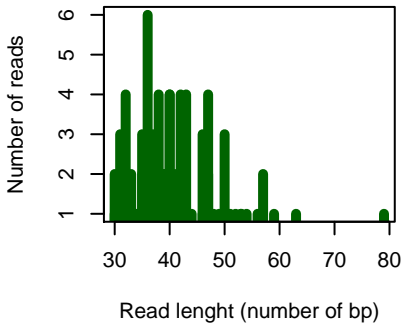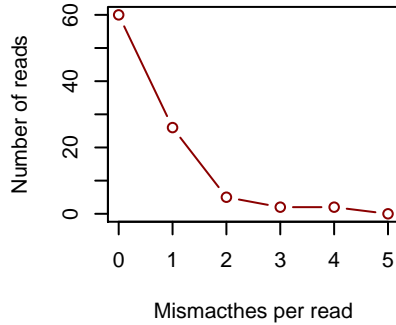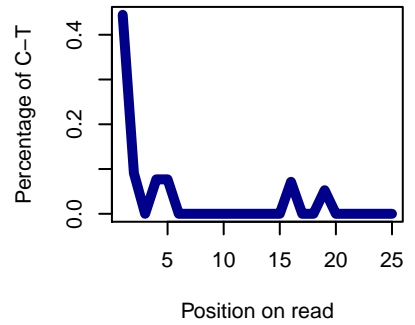

### UE1215 Lolium

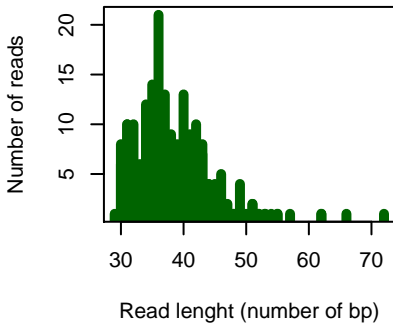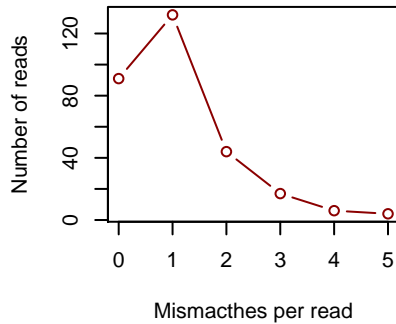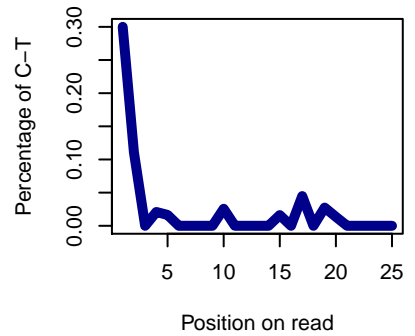

### UE1215 Pinus

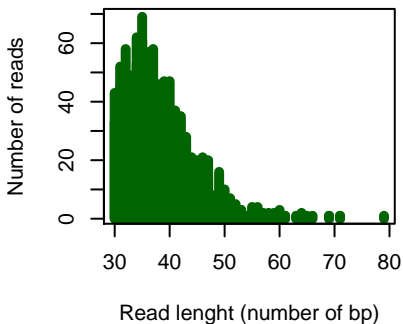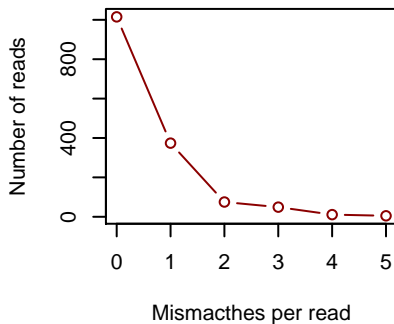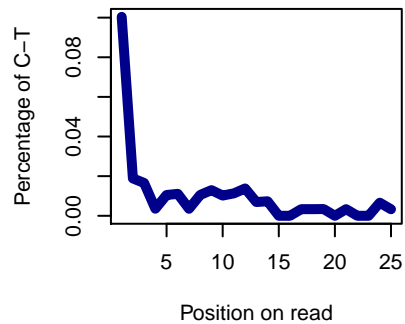

### UE1217 Abies

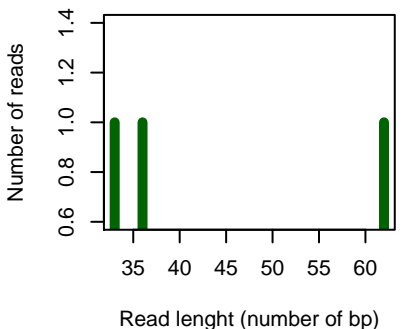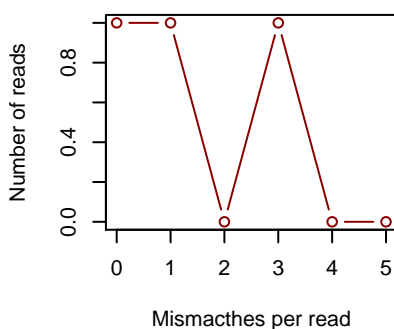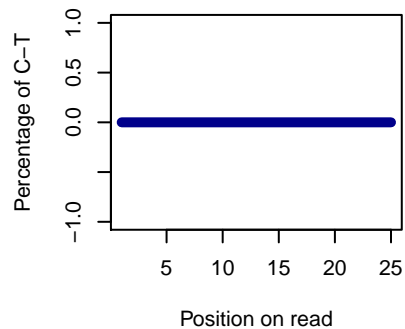

### UE1217 Brachypodium

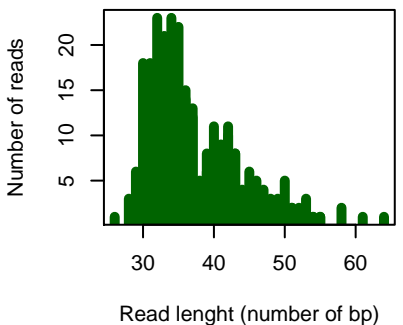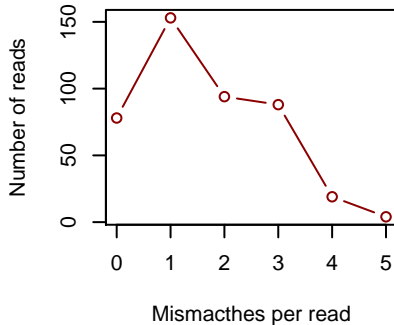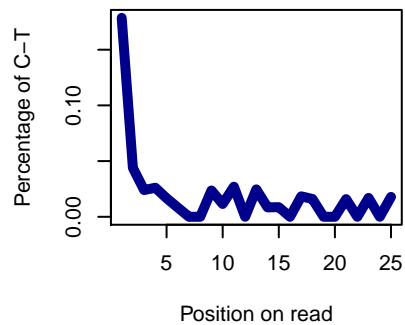

### UE1217 *Castilleja*

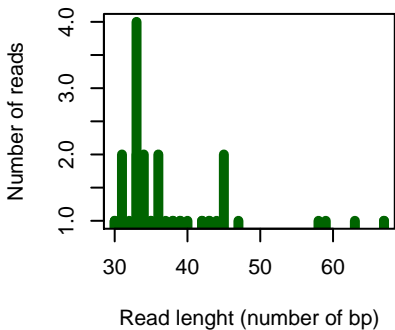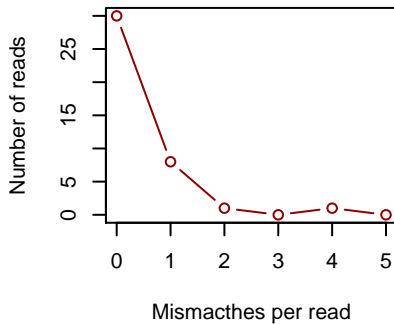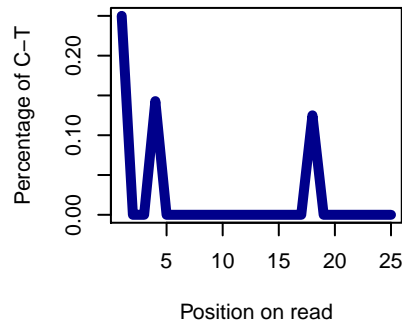

### UE1217 *Hordeum*

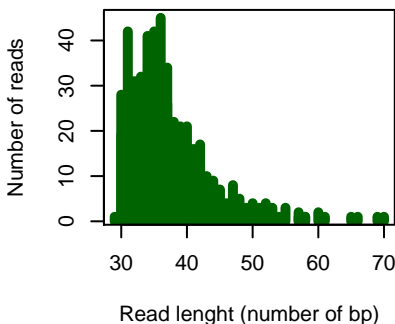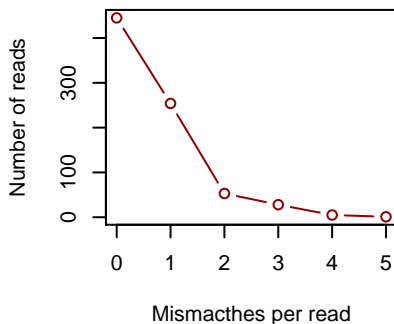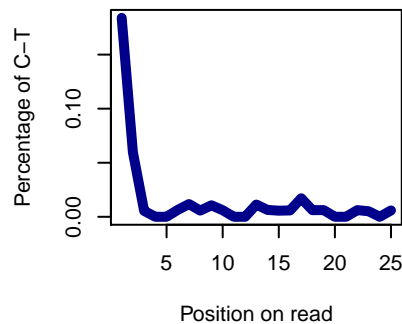

### UE1217 *Juniperus*

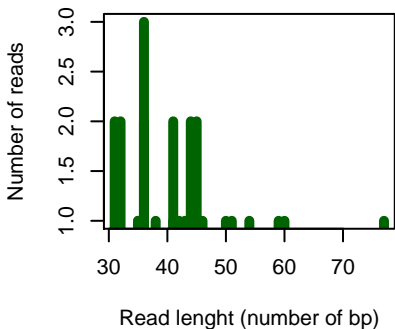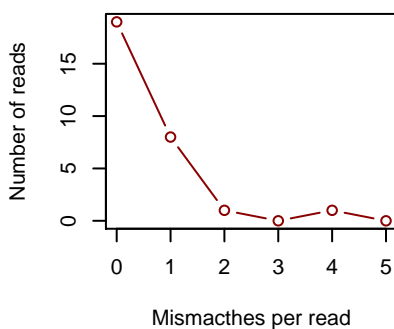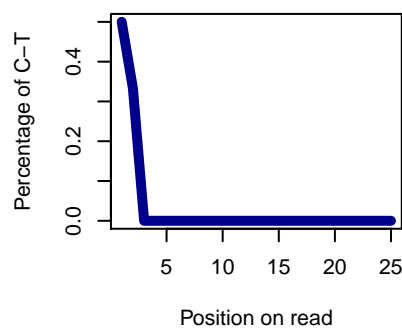



### UE1217 *Lolium*

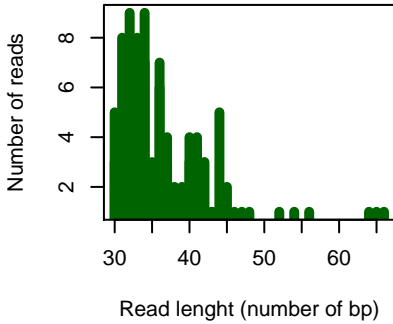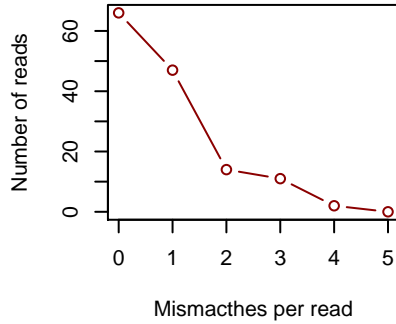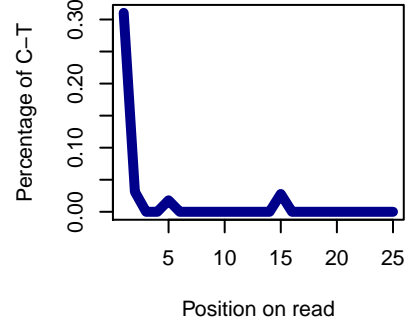

### UE1217 *Pinus*

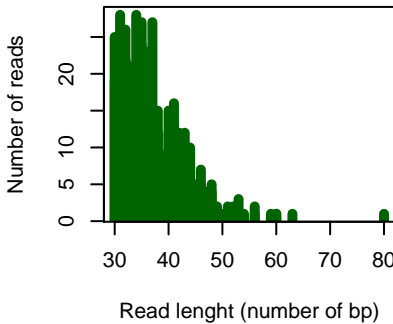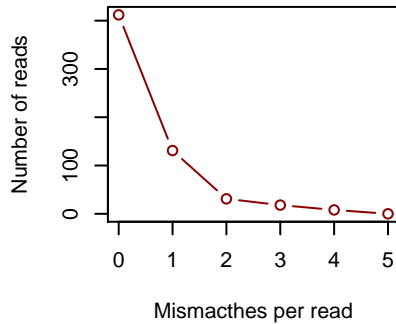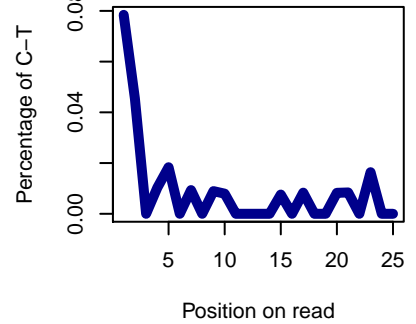

### UE1218 *Abies*

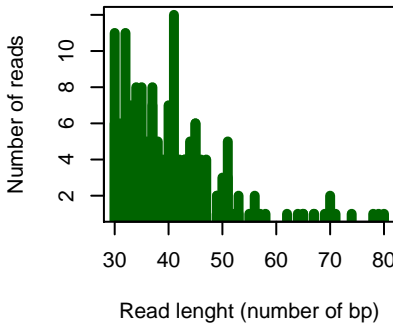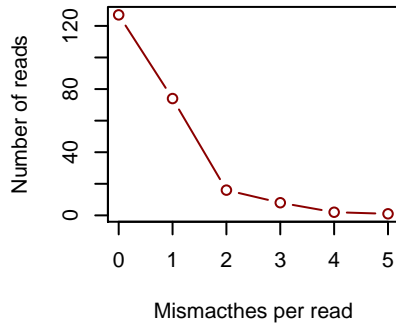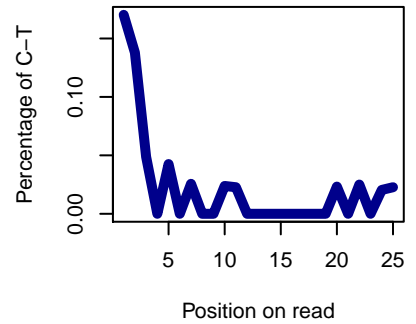

### UE1218 Hordeum

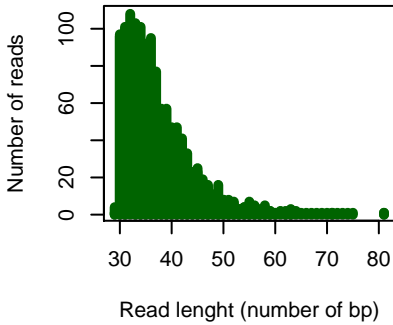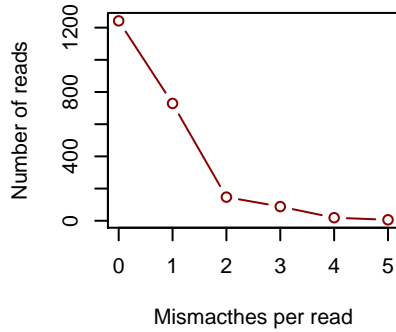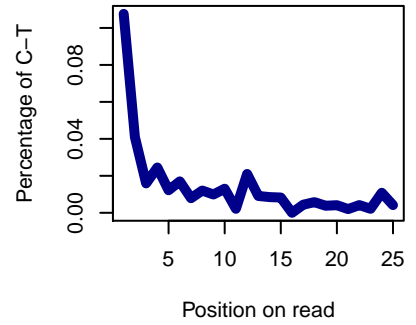

### UE1218 Juniperus

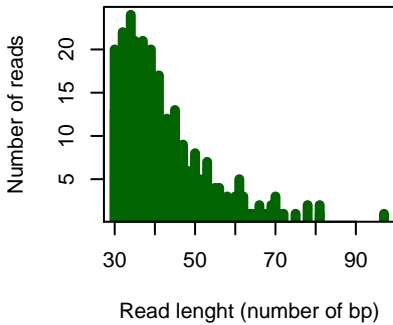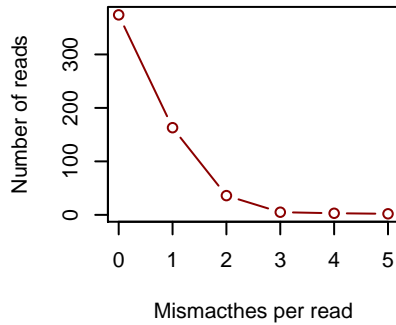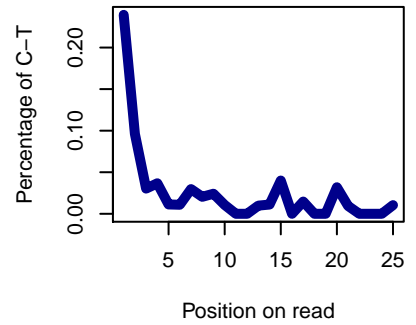

### UE1218 Lolium

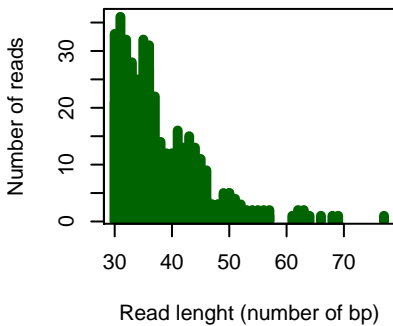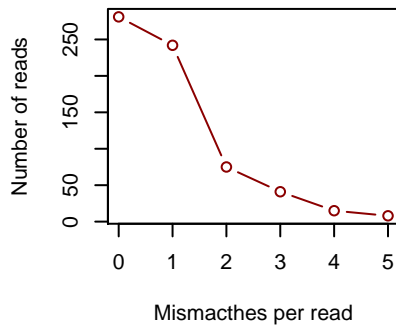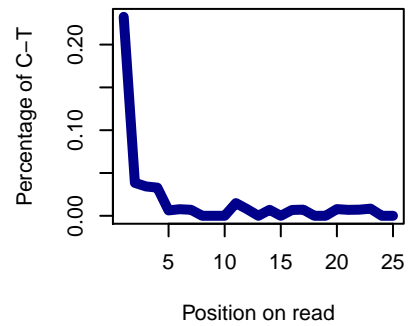

### UE1218 Picea

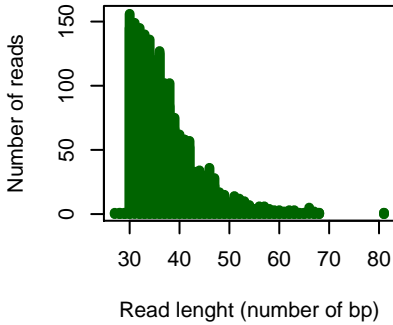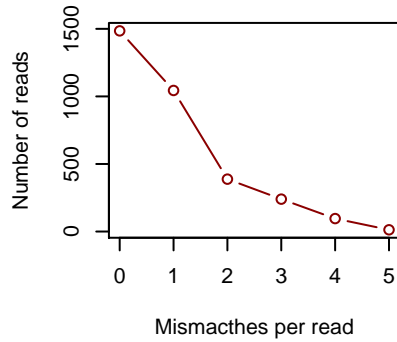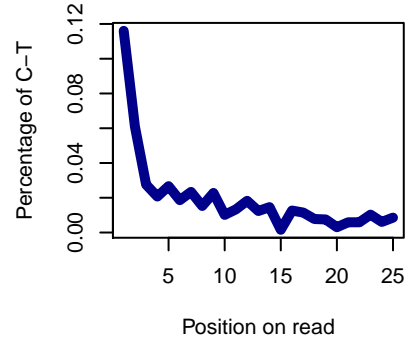

### UE1218 Pinus

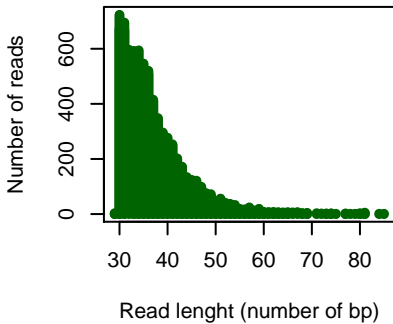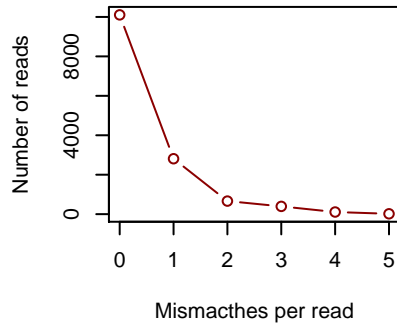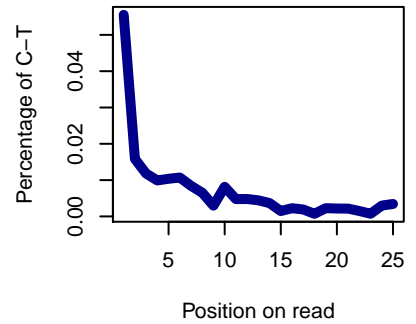

### UE1218 Strobus

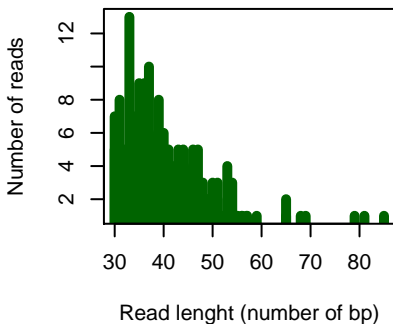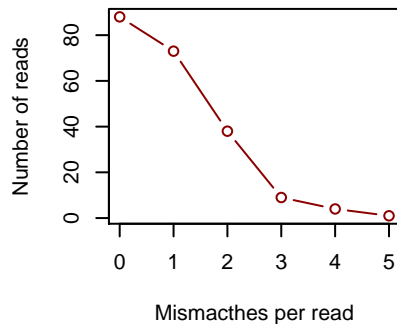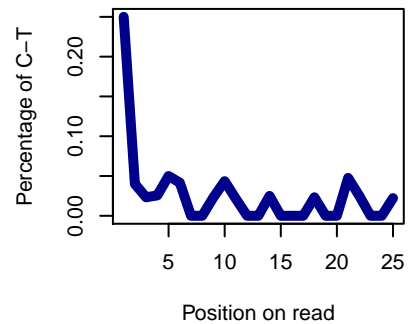

### UE1218 *Trebouxia*

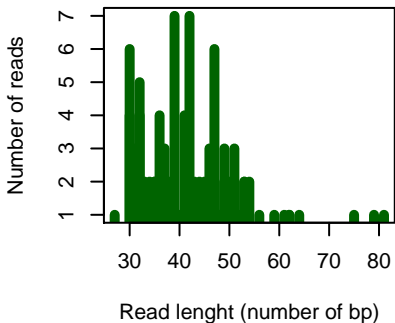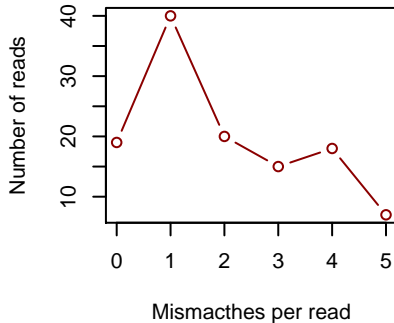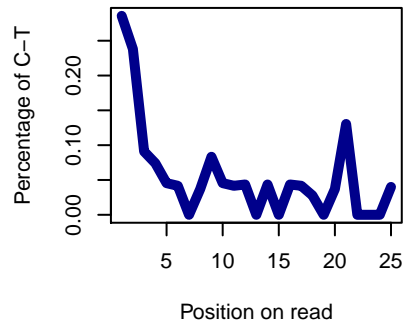

### UE1223 *Abies*

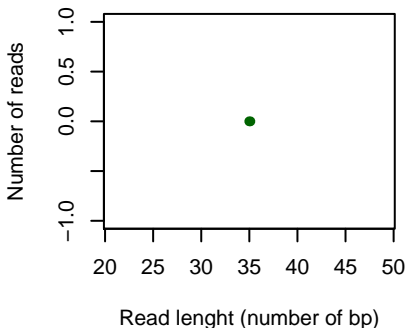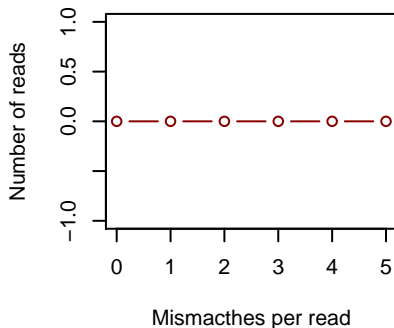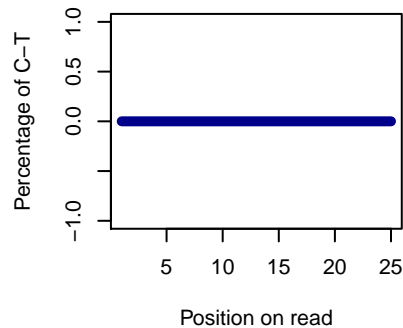

### UE1223 *Auxenochlorella*

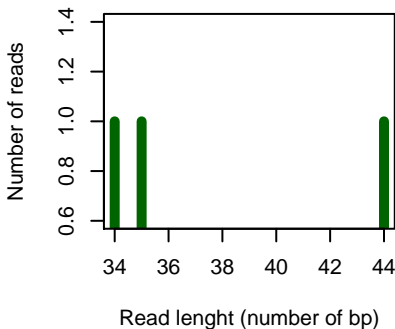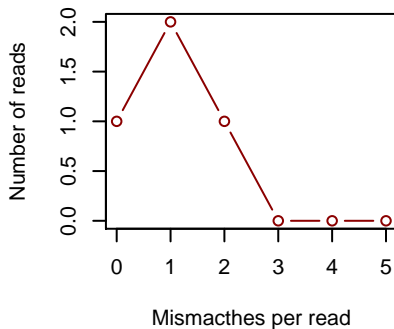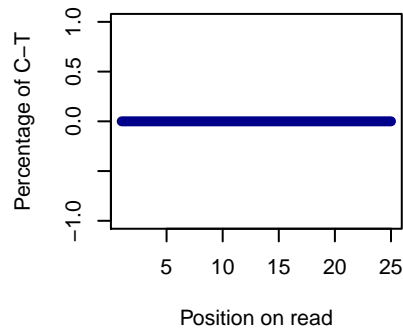

### UE1223 *Brachypodium*

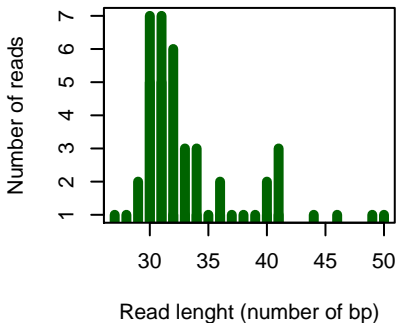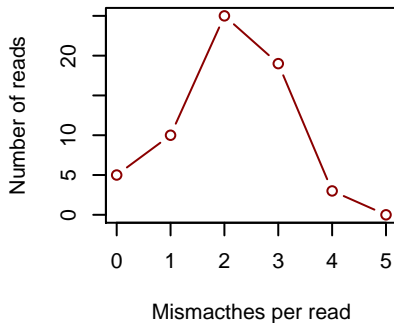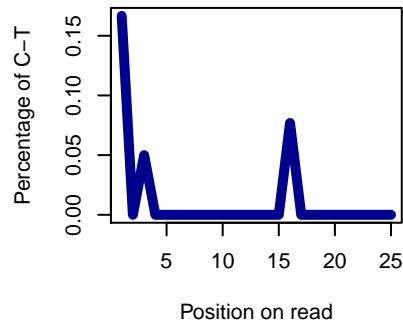

### UE1223 *Chlamydomonas*

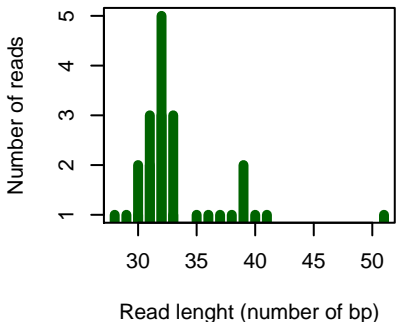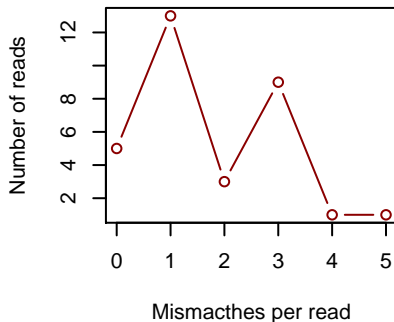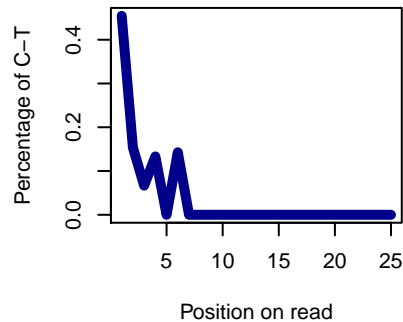

### UE1223 *Hordeum*

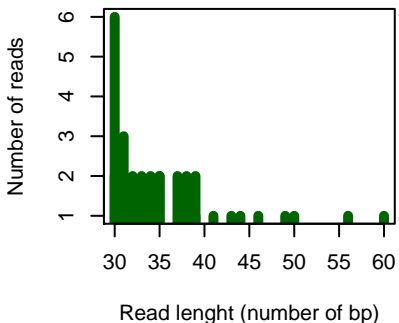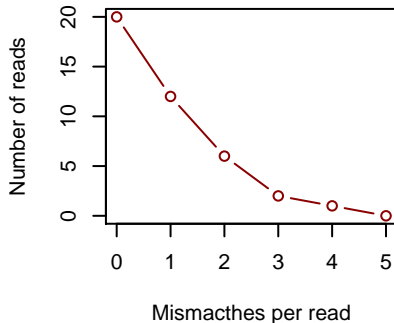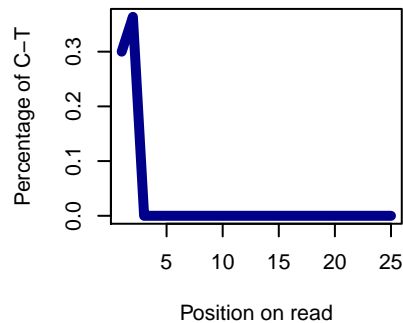

### UE1223 *Jenufa*

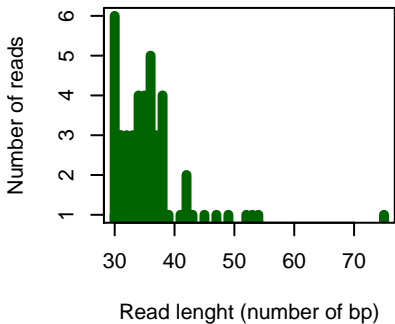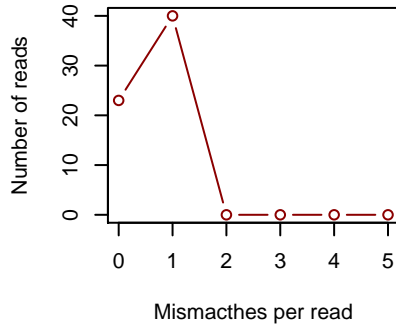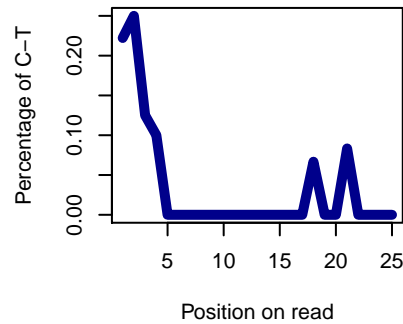

### UE1223 *Juniperus*

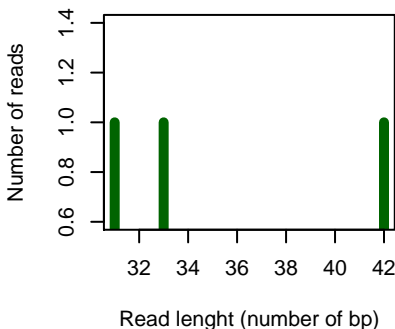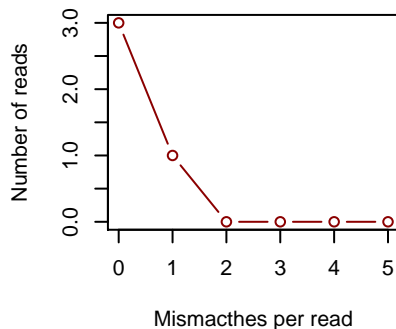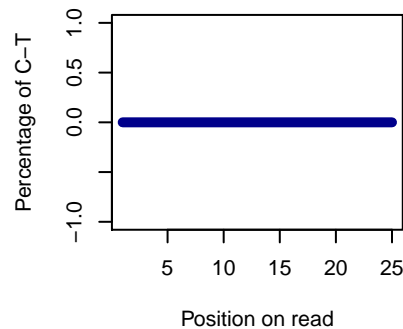

### UE1223 *Lolium*

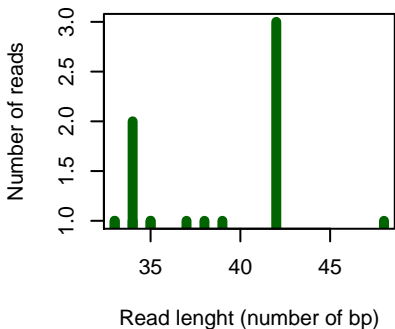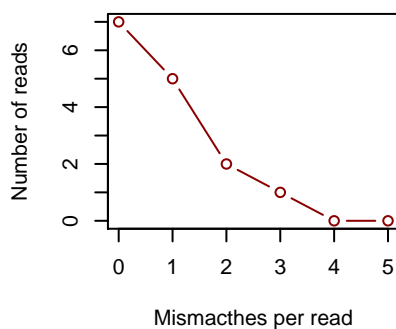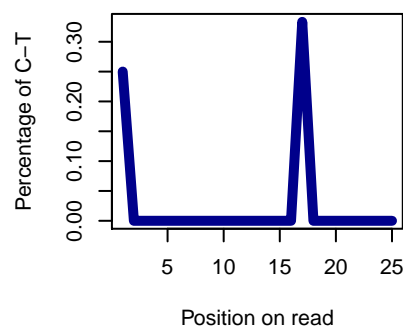

### UE1223 Pinus

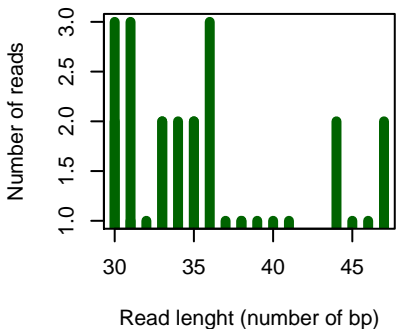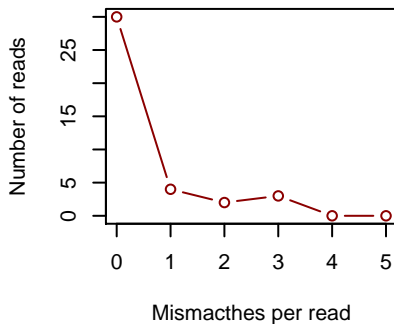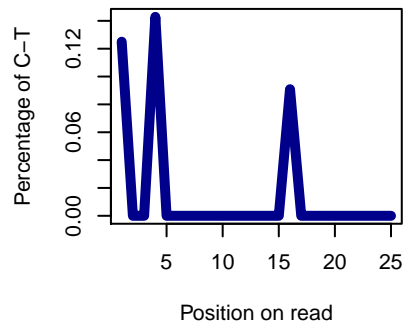

### UE1223 Prasiola

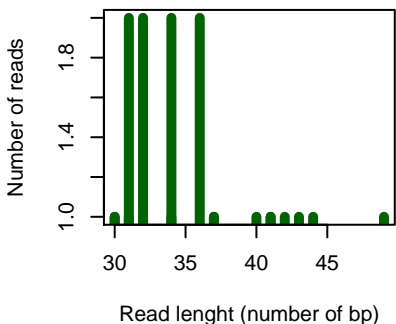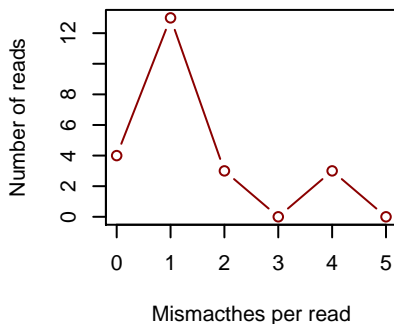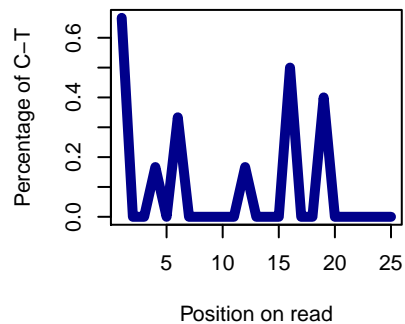

### UE1223 Solanum

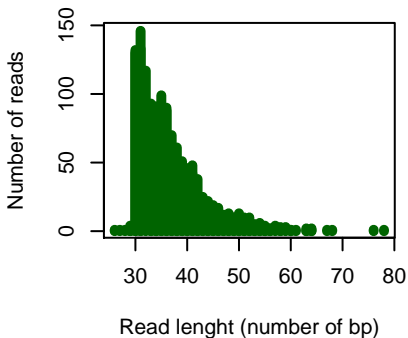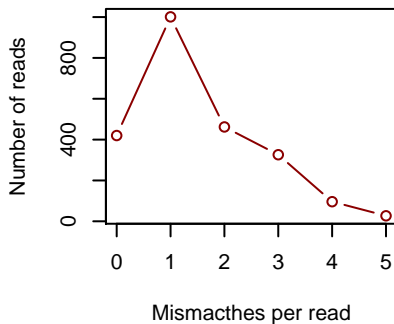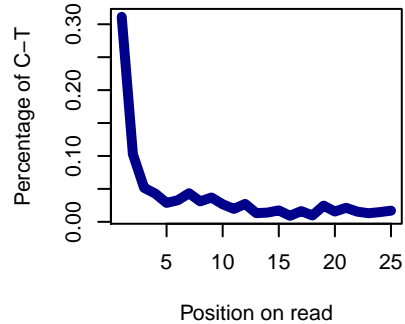

# UE1223 Trebouxia

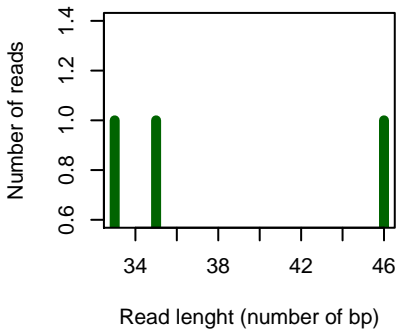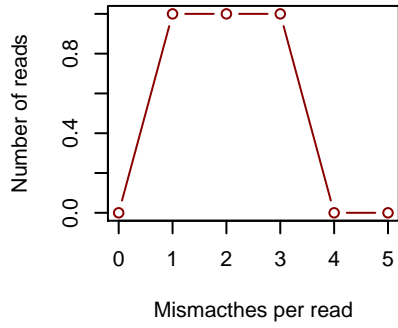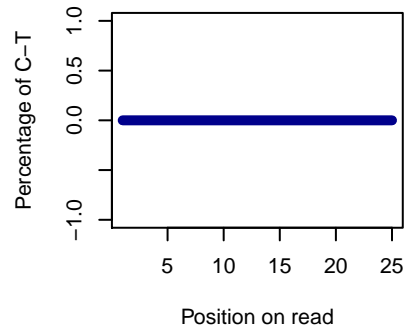

Supplement: 41586_2020_2509_MOESM4_ESM.pdf [file 41586_2020_2509_MOESM4_ESM.pdf]
