# Supplementary material for: Evidence of human occupation in Mexico around the Last Glacial Maximum
Source: Springer Nature journal article supplement (doi:10.1038/s41586-020-2509-0), 2020-07-22
Supplement: 41586_2020_2509_MOESM5_ESM.pdf [file 41586_2020_2509_MOESM5_ESM.pdf]

SUPPLEMENTARY INFORMATION FILE SI4  
Link to the 3D digital photogrammetric model of X-12\*

\*This is an on-line model that shows the tridimensional photographic model of the excavation, including the display of the entire spectrum of eDNA samples extracted in 2019 for aDNA reassessment, as well as the northern wall of the cave.

— Click on the link or copy it: —

<https://sketchfab.com/3d-models/2caa3caeb04d4170a02a42ae685d9d54>
